# Supplementary material for: Transcriptome-wide study of TNF-inhibitor therapy in rheumatoid arthritis reveals early signature of successful treatment
Source: PubMed Central journal article supplement (PMC7948368; doi:10.1186/s13075-021-02451-9), 2021-03-10

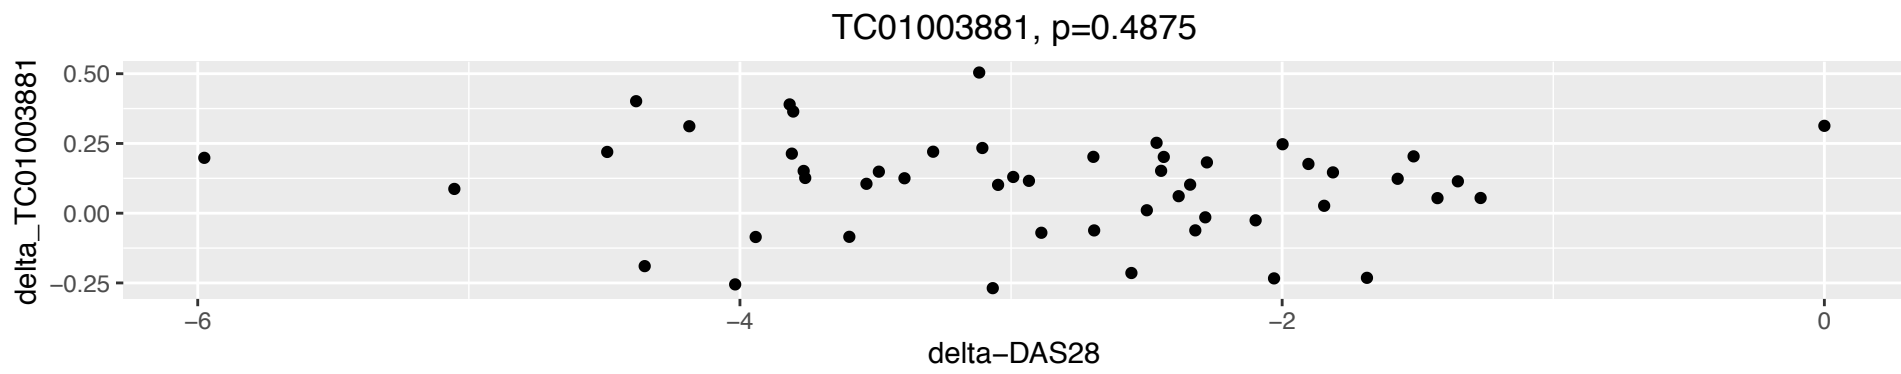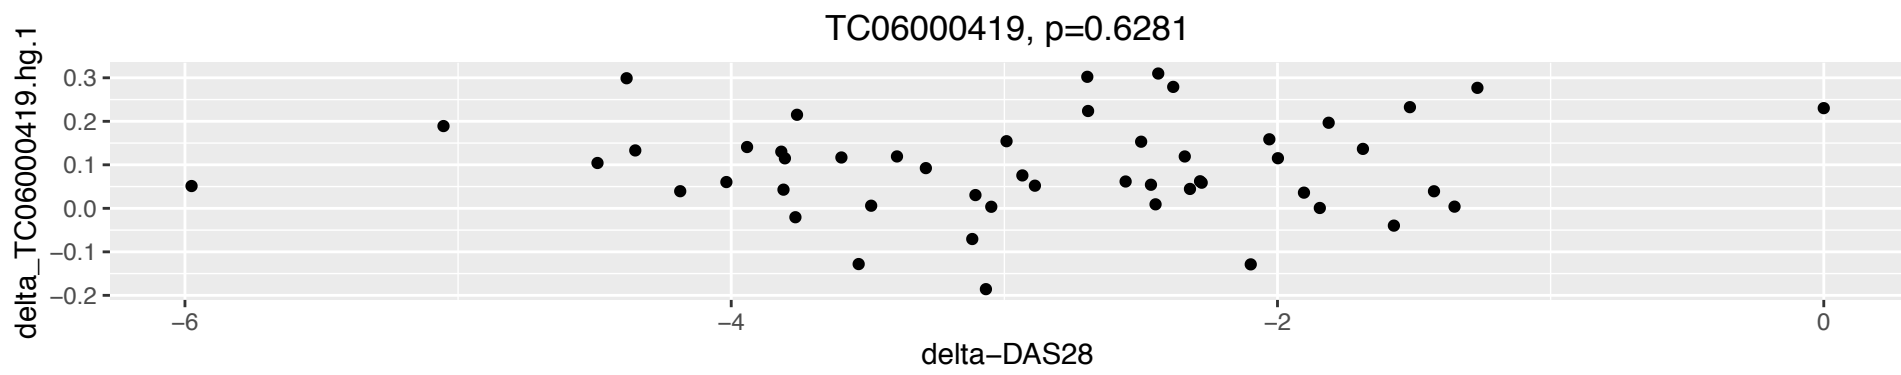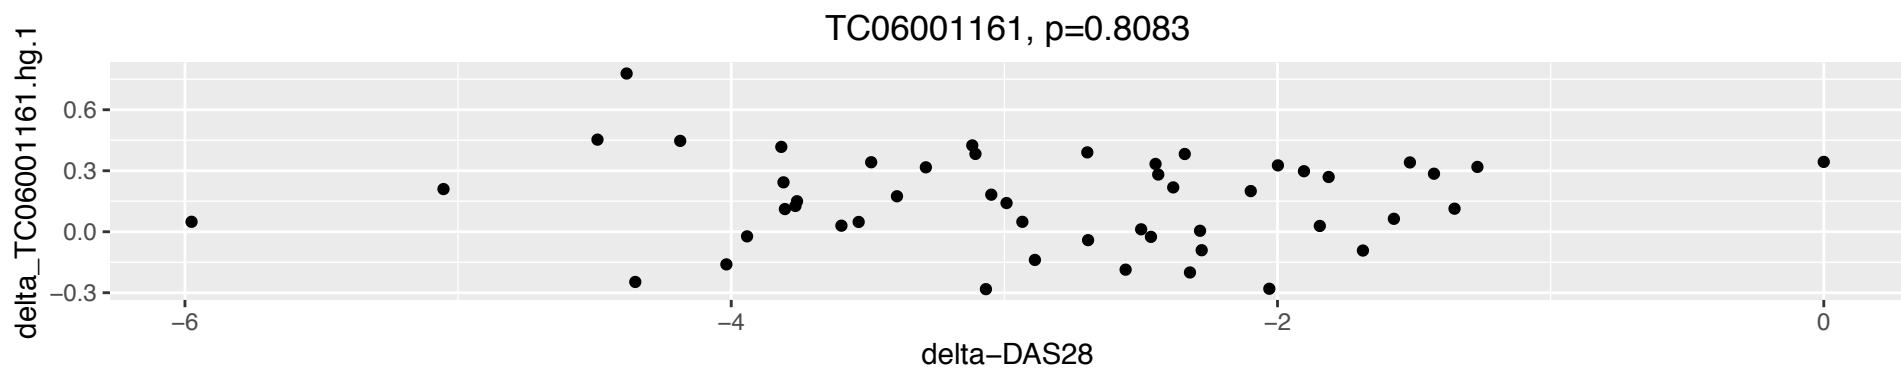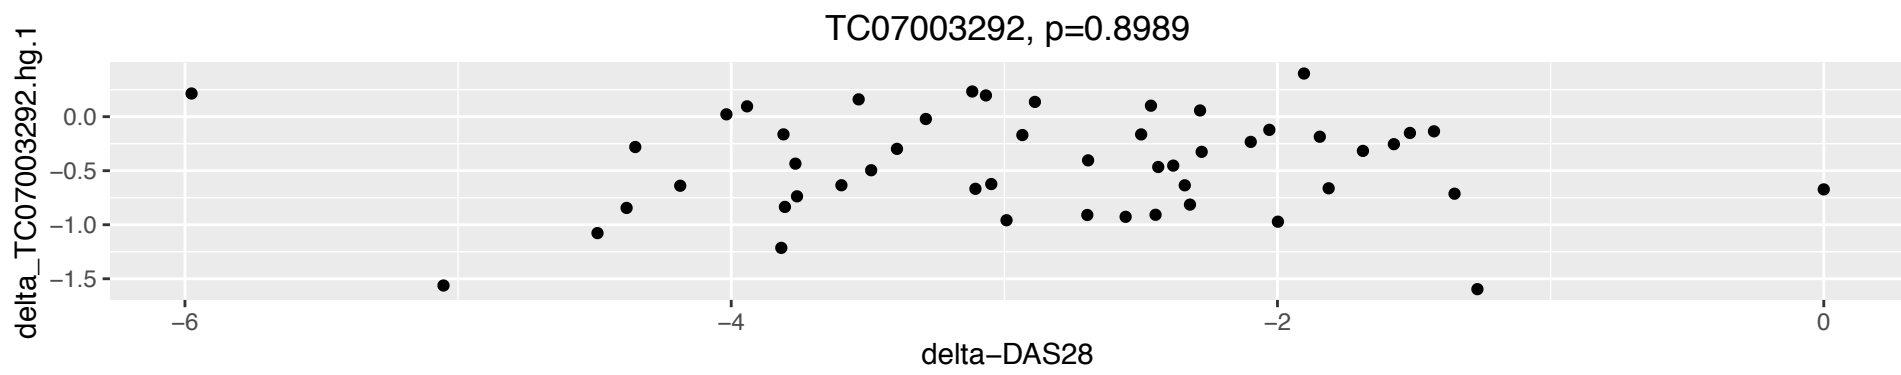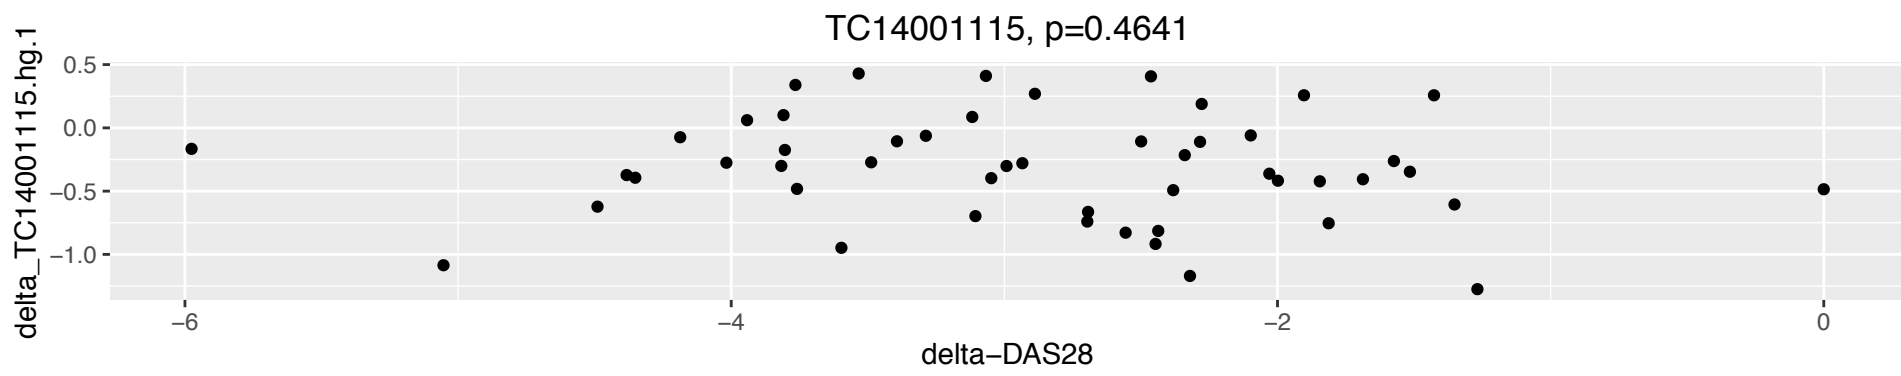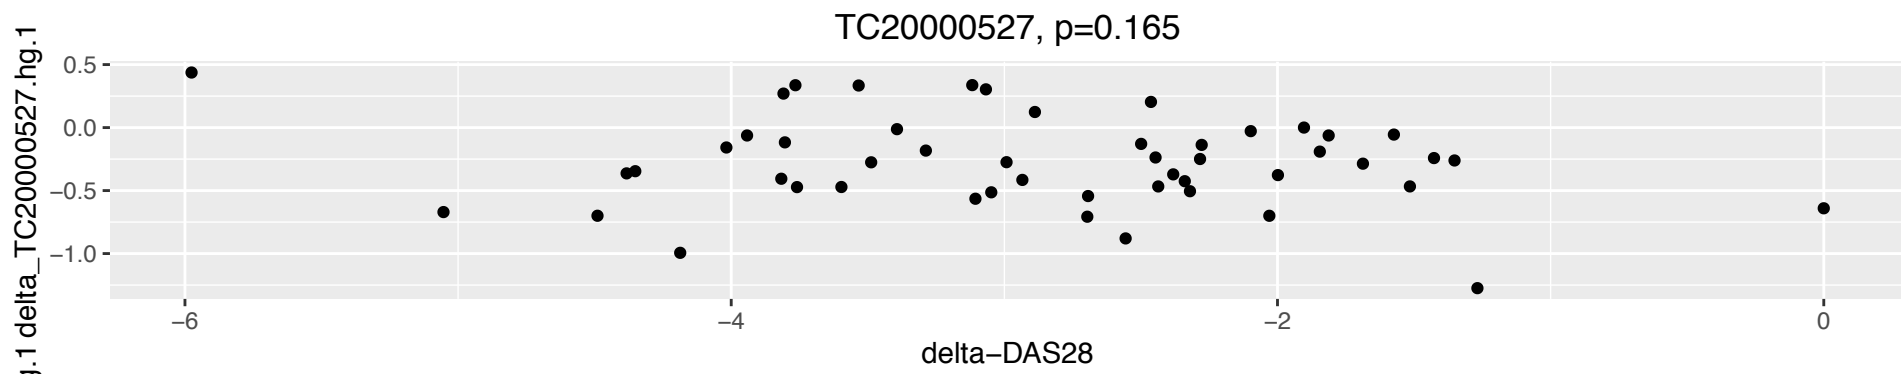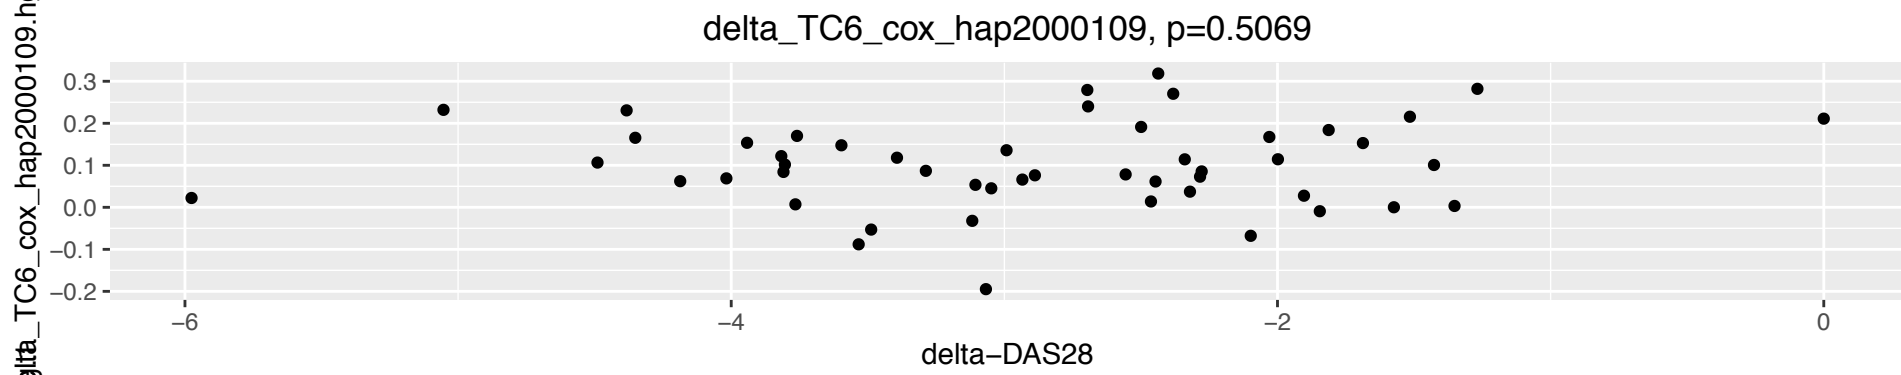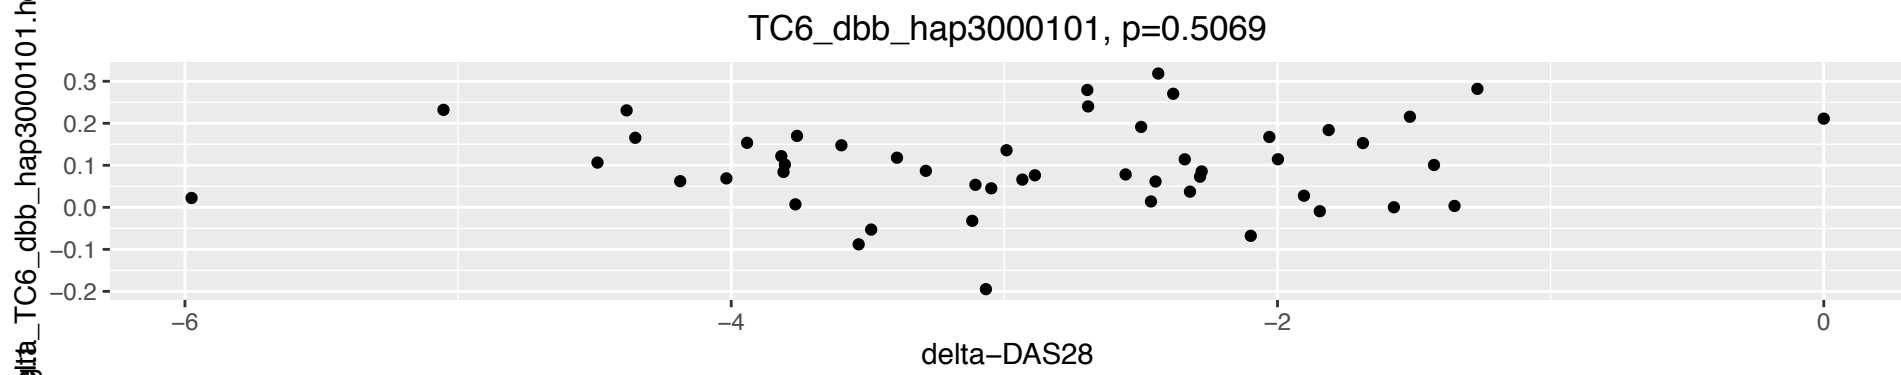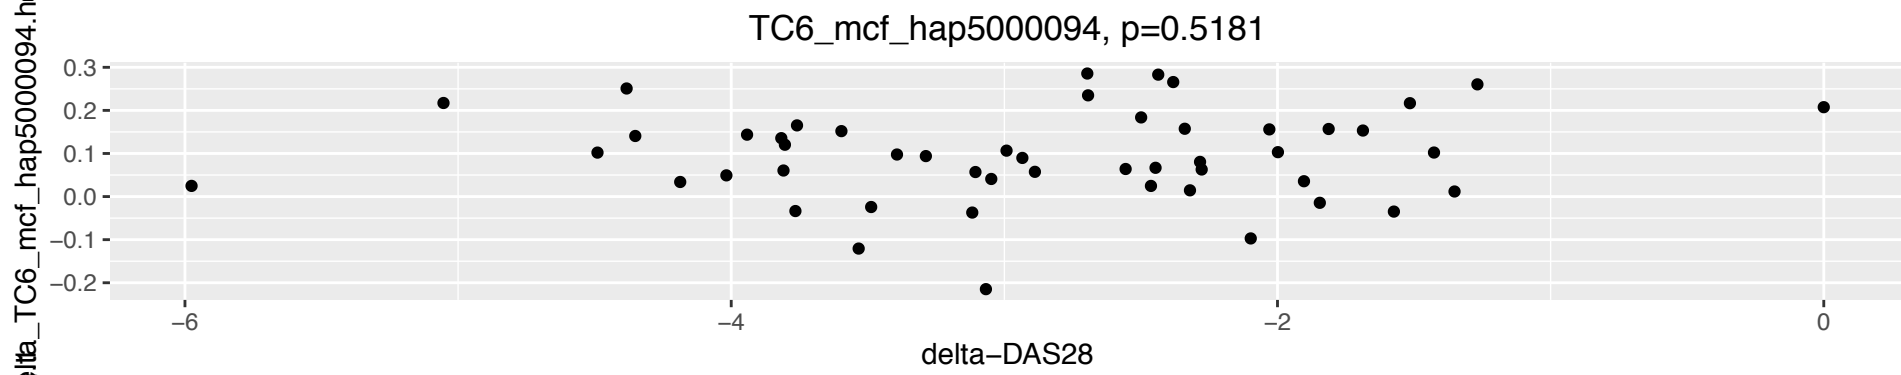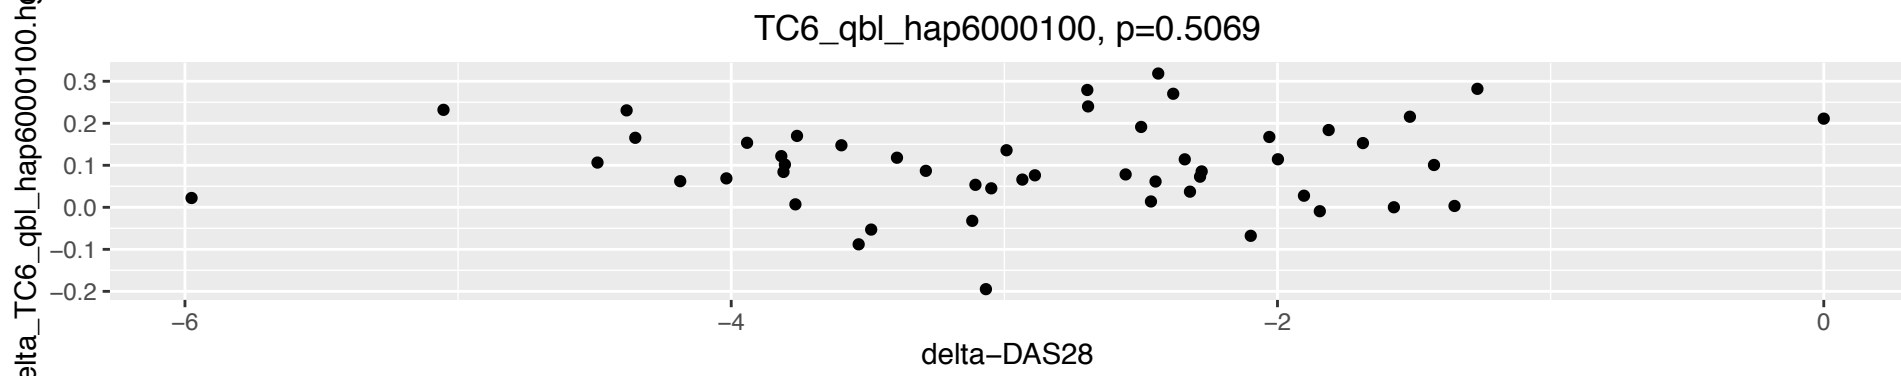

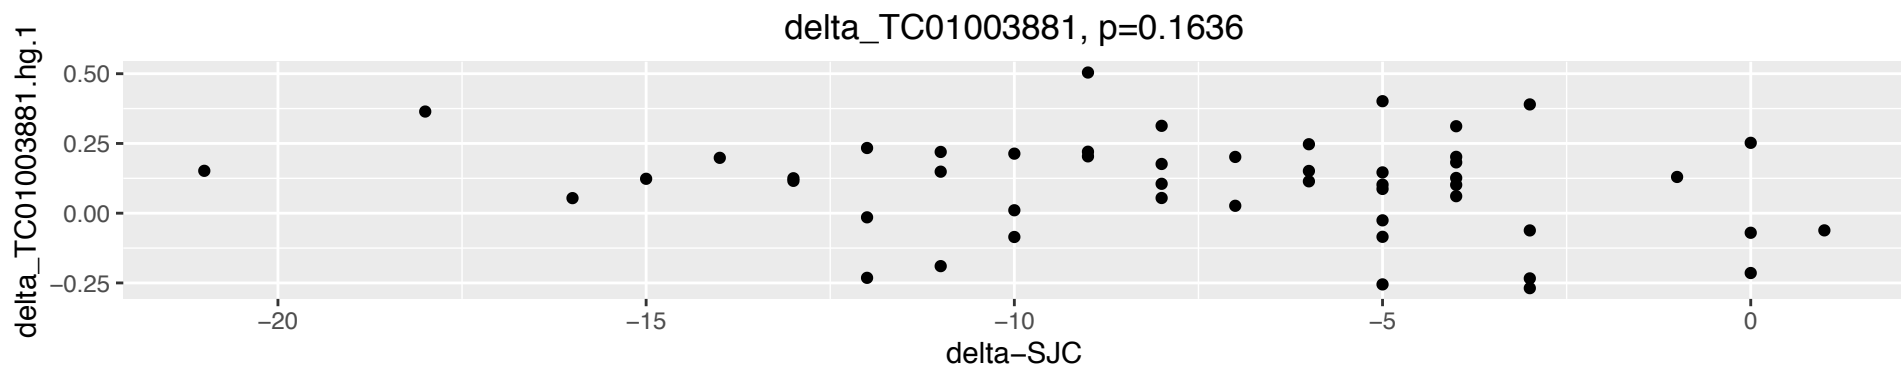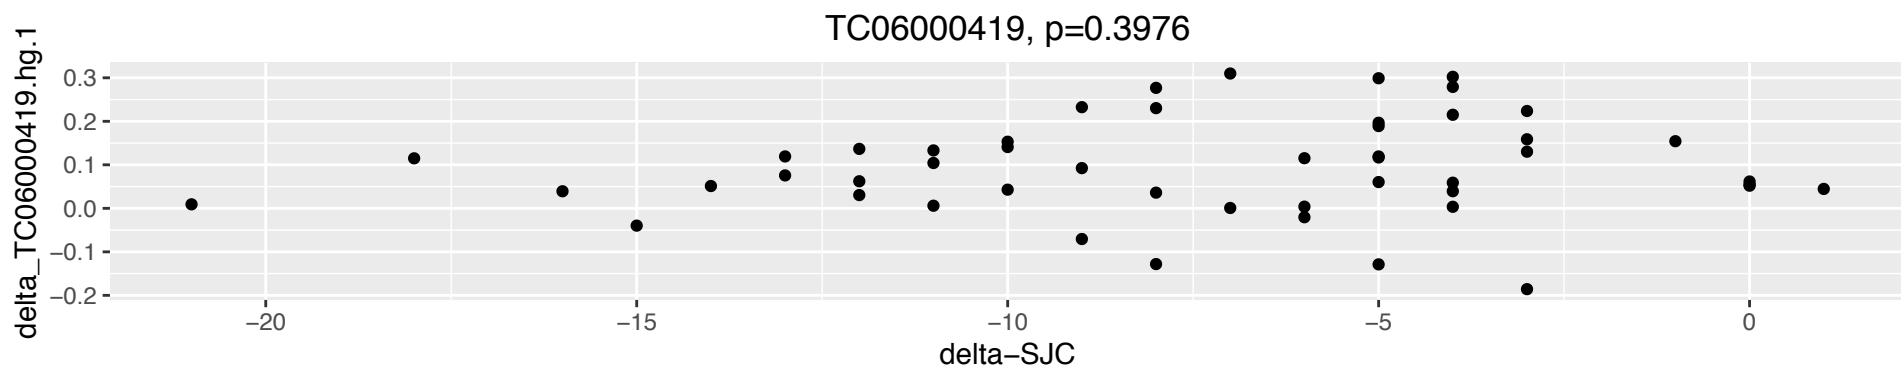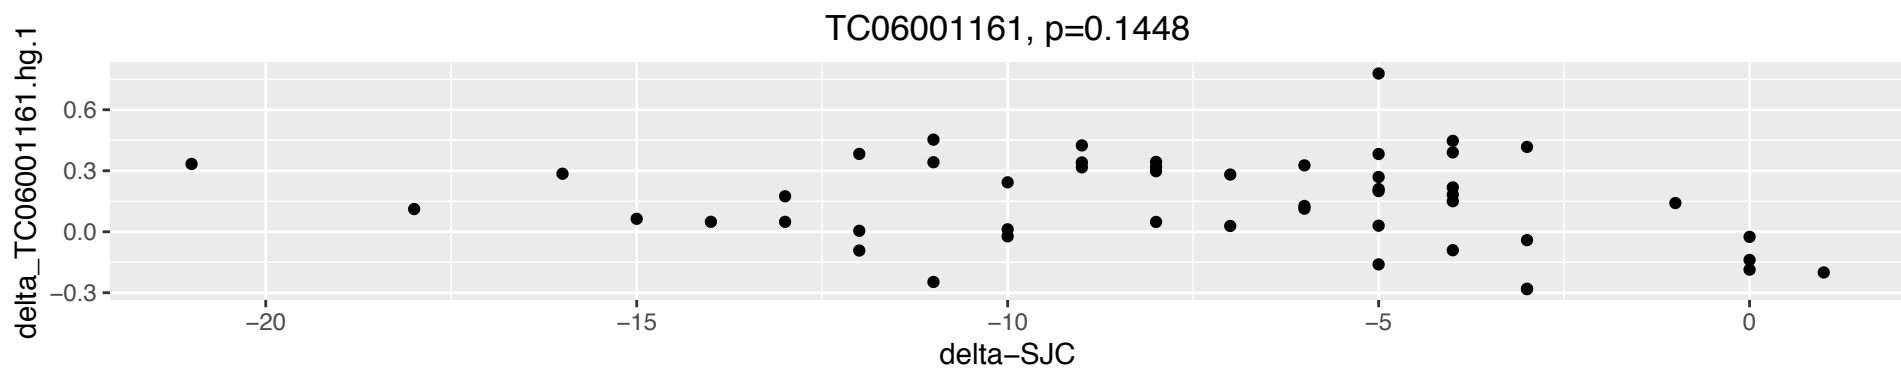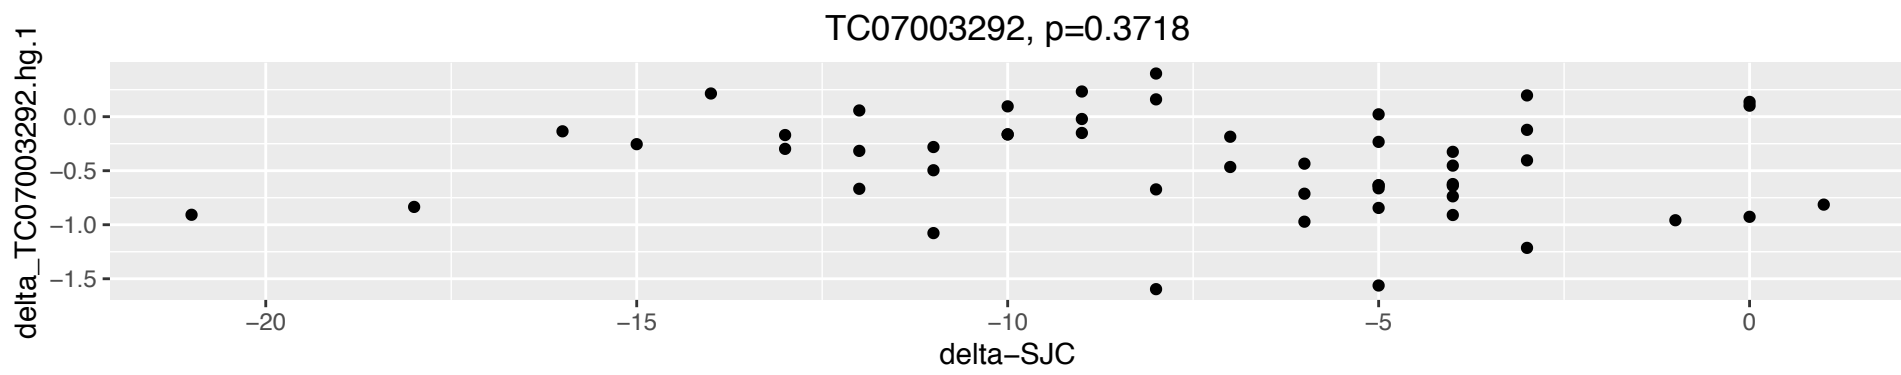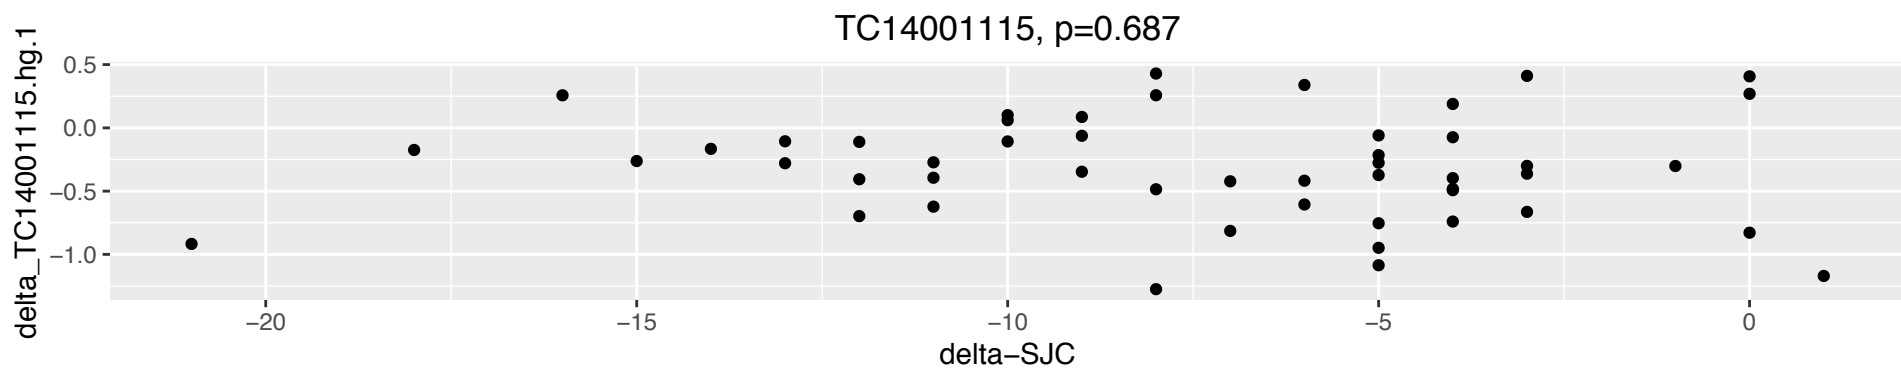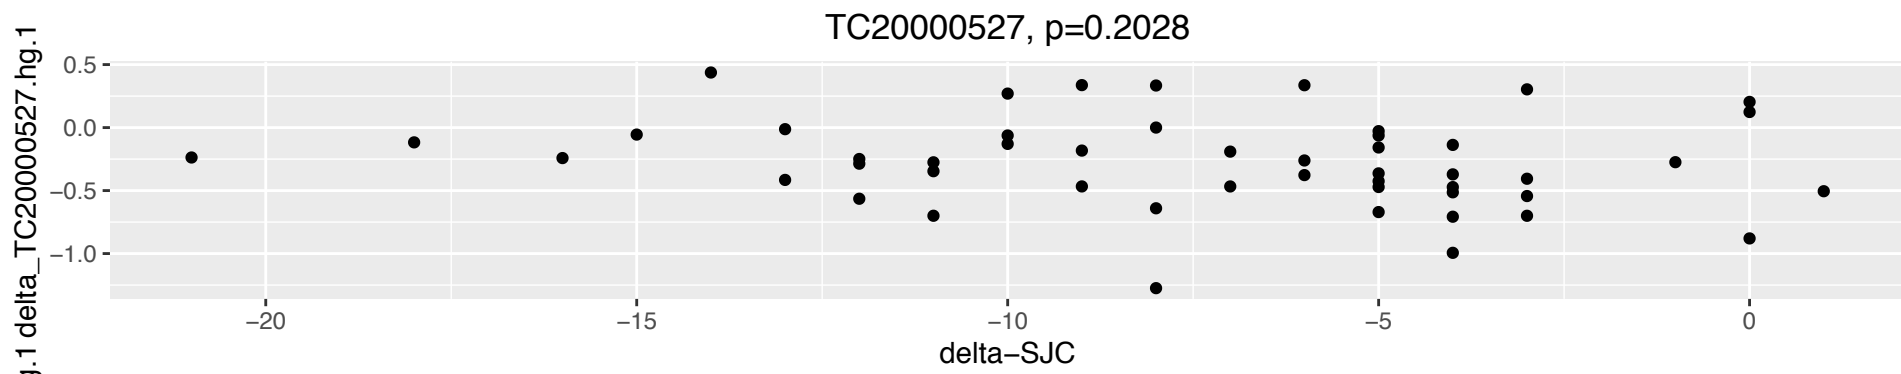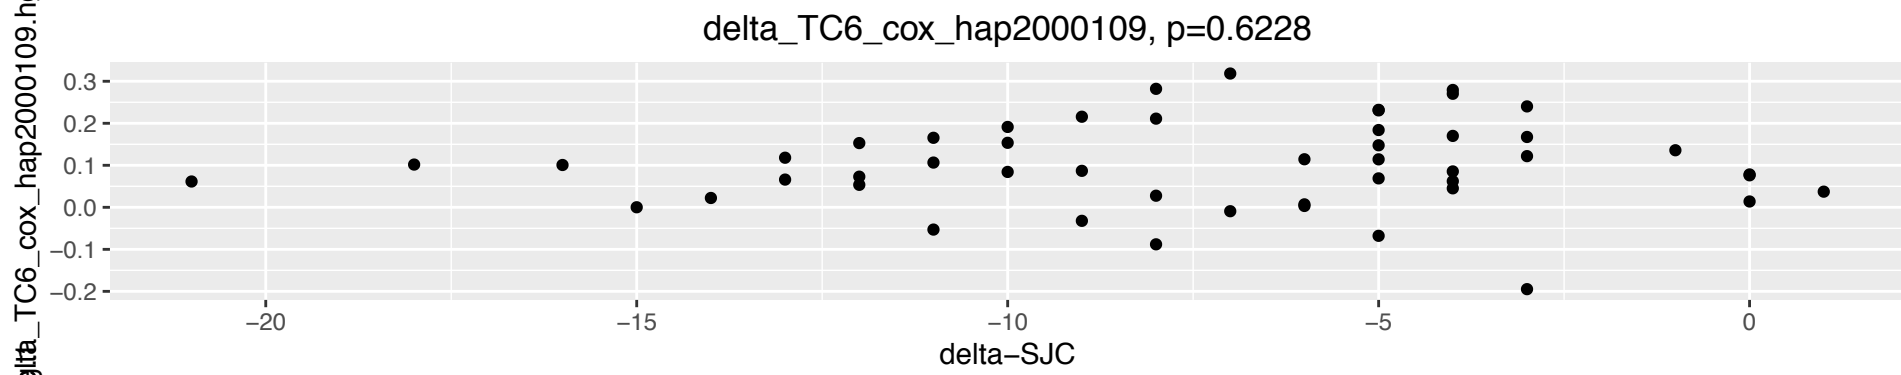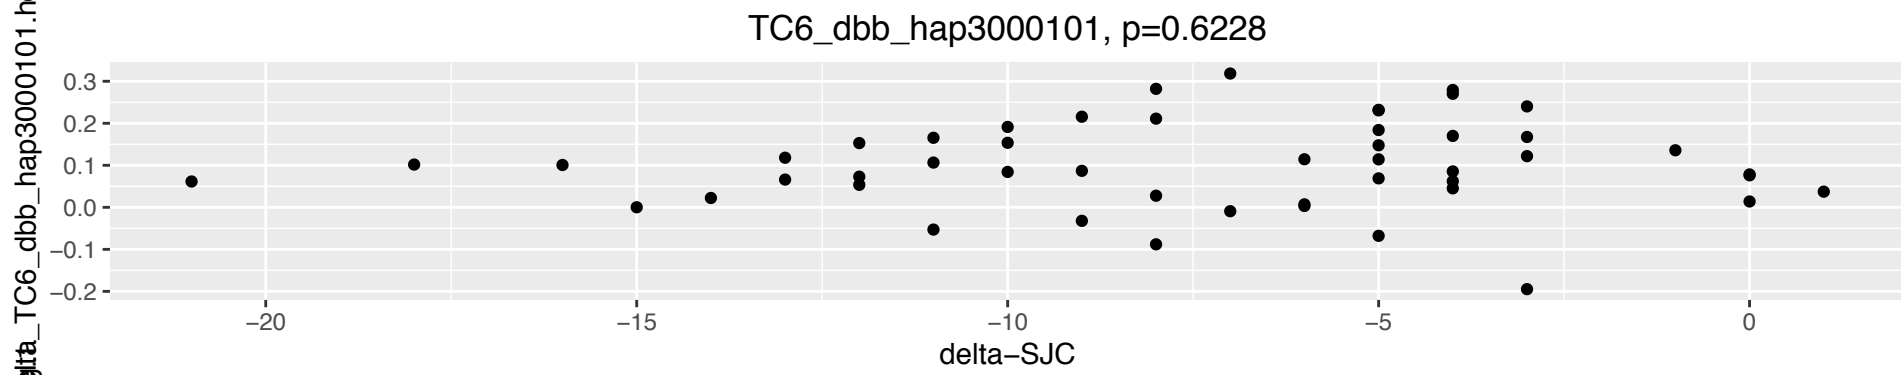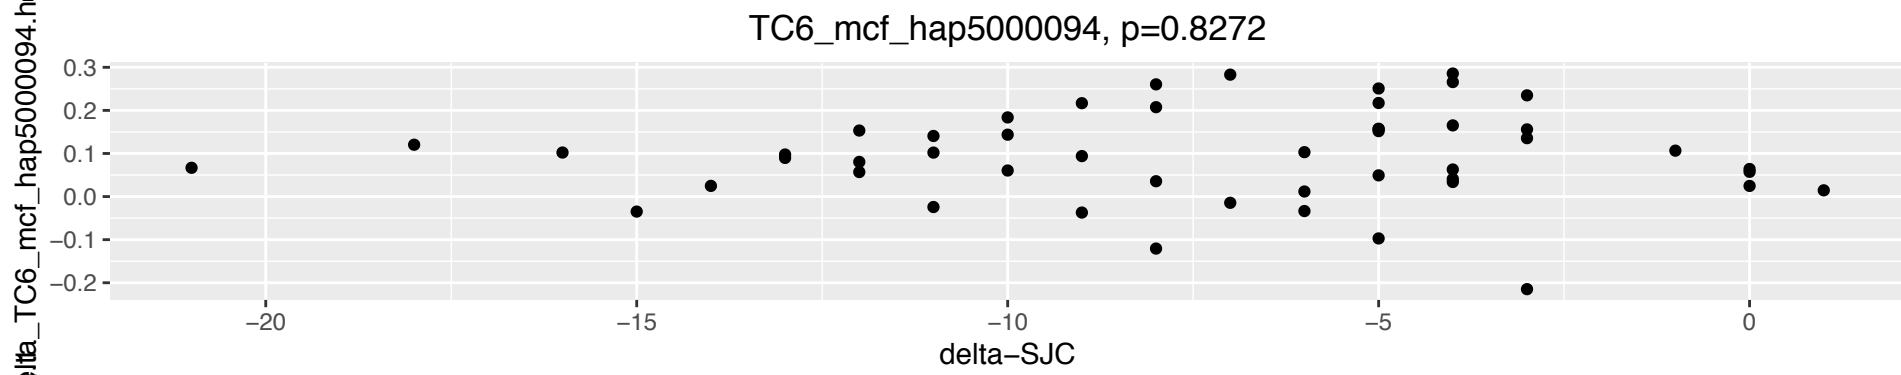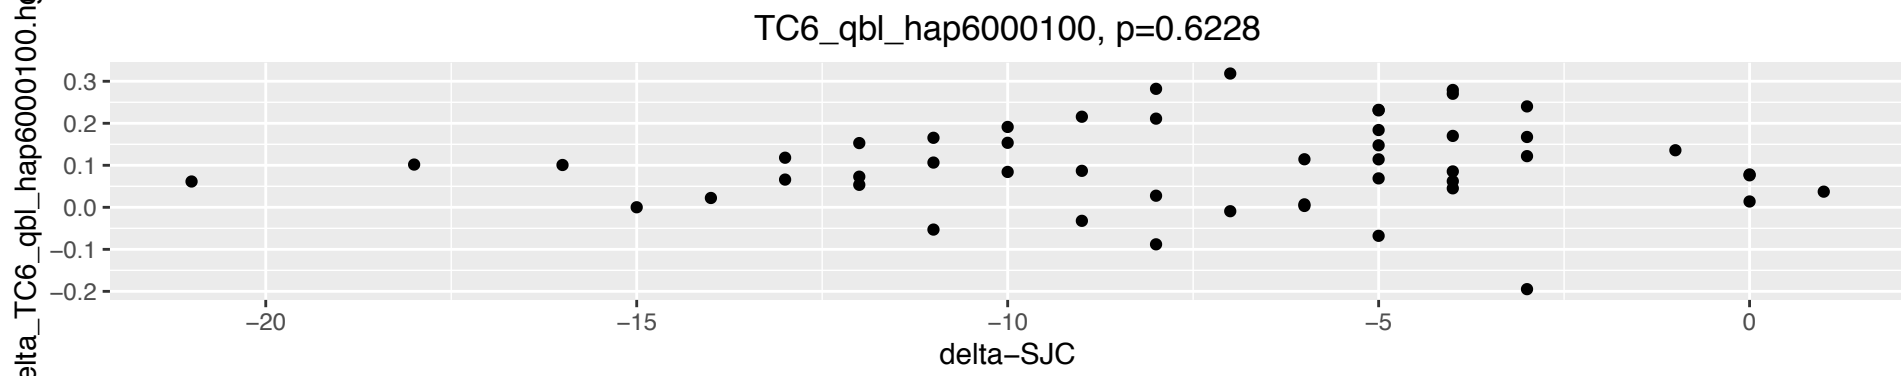

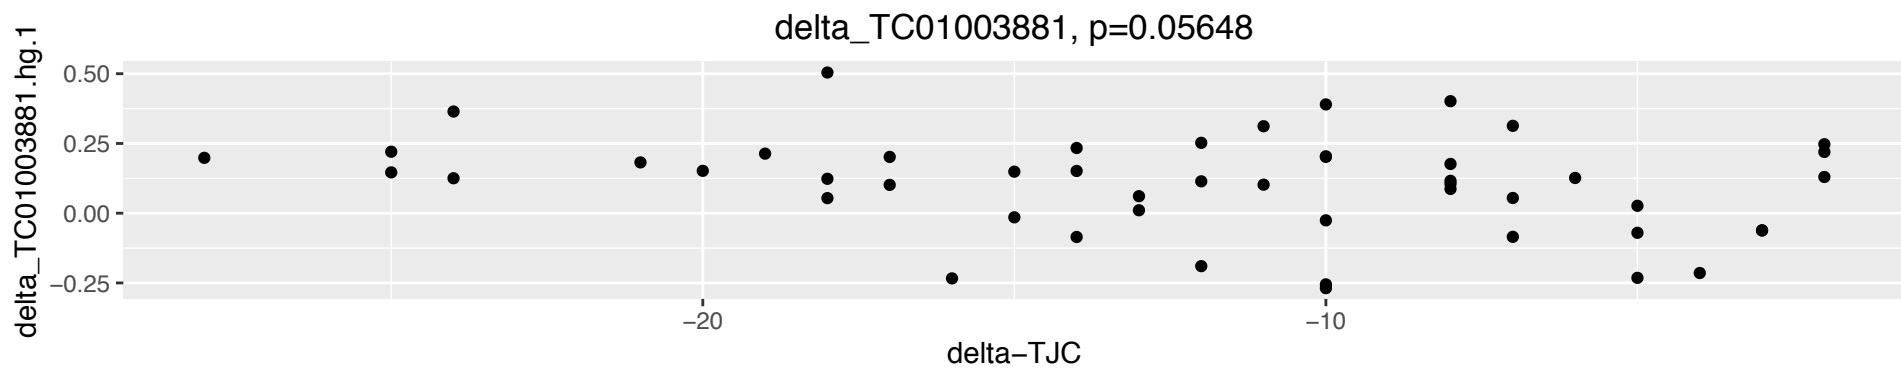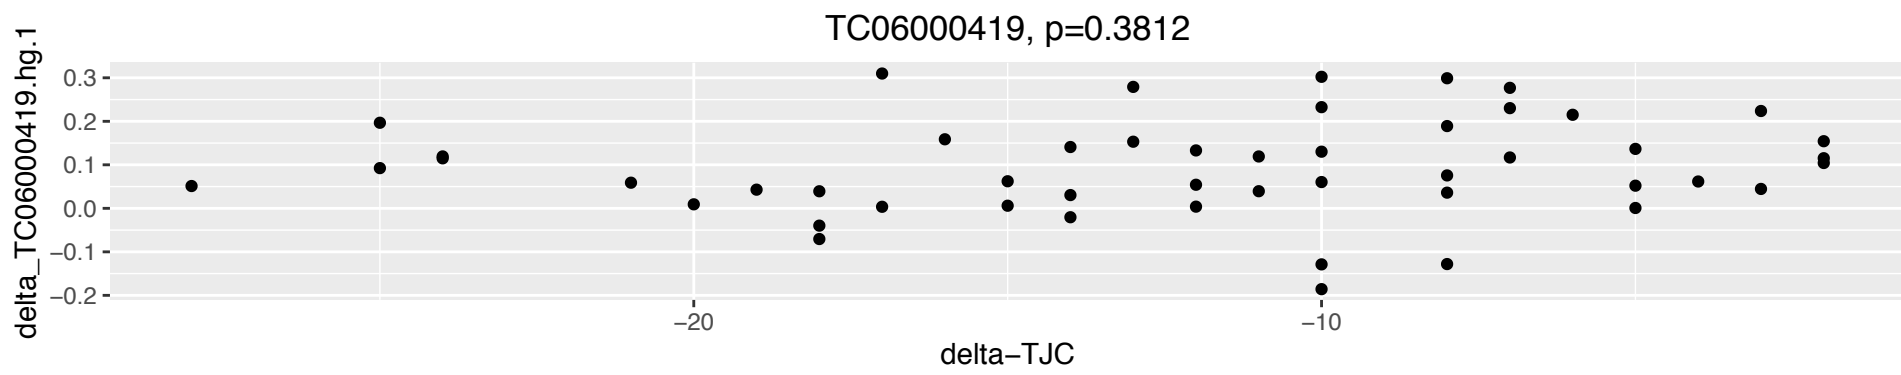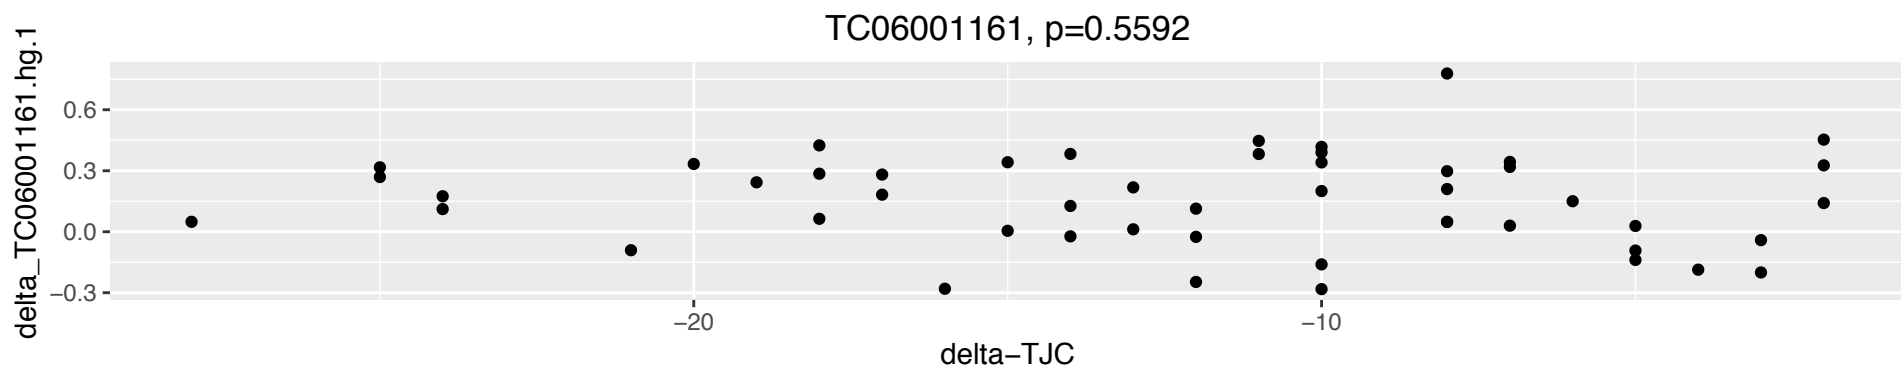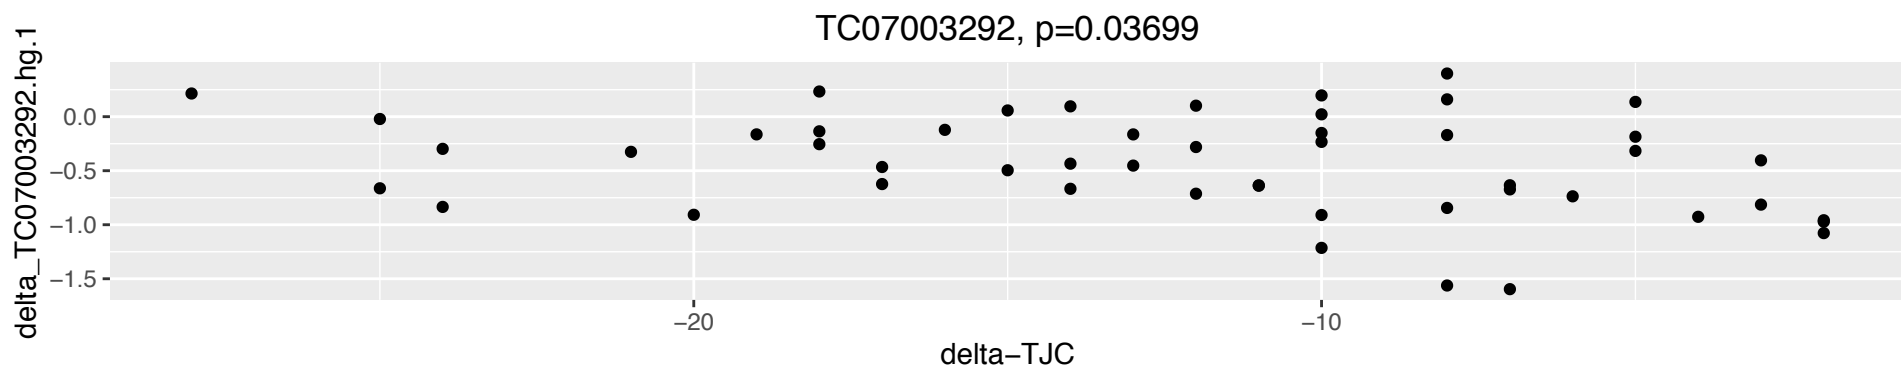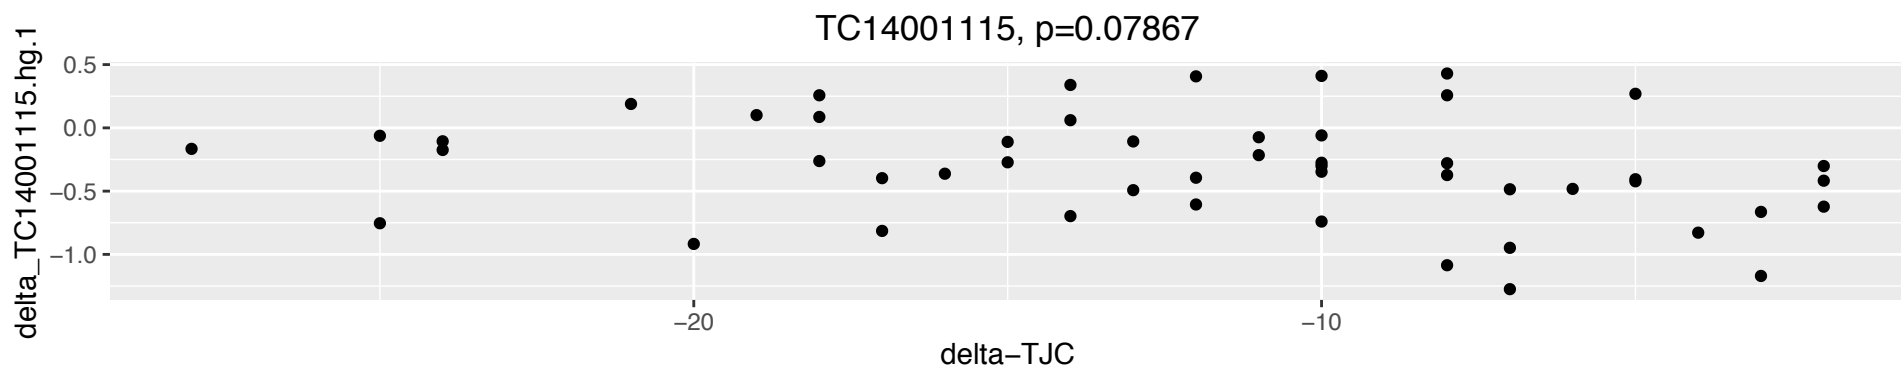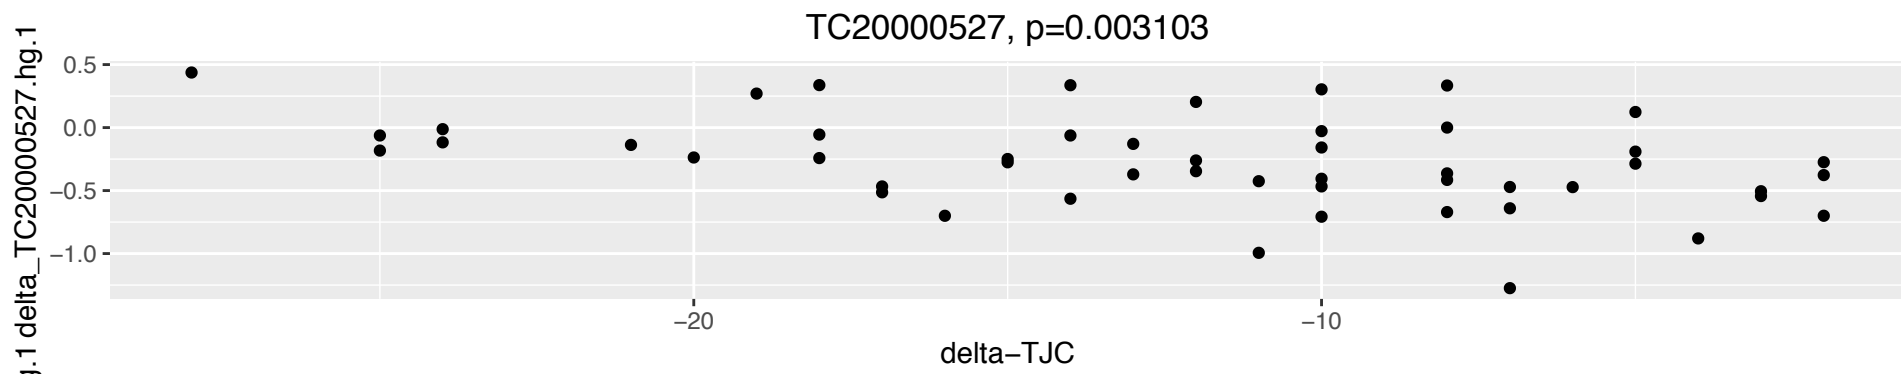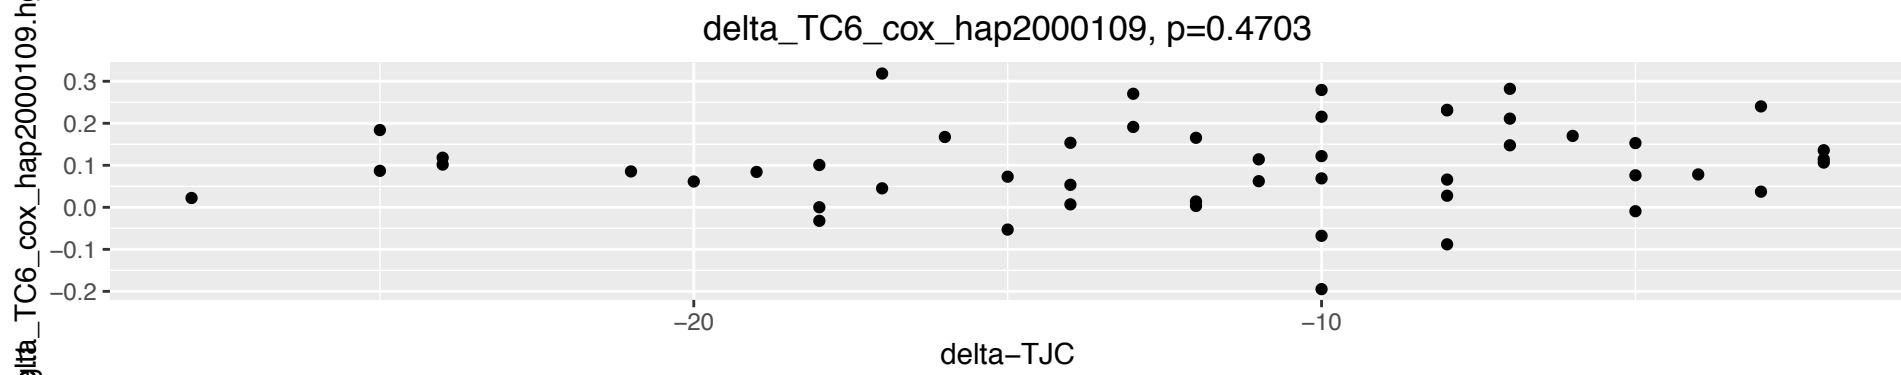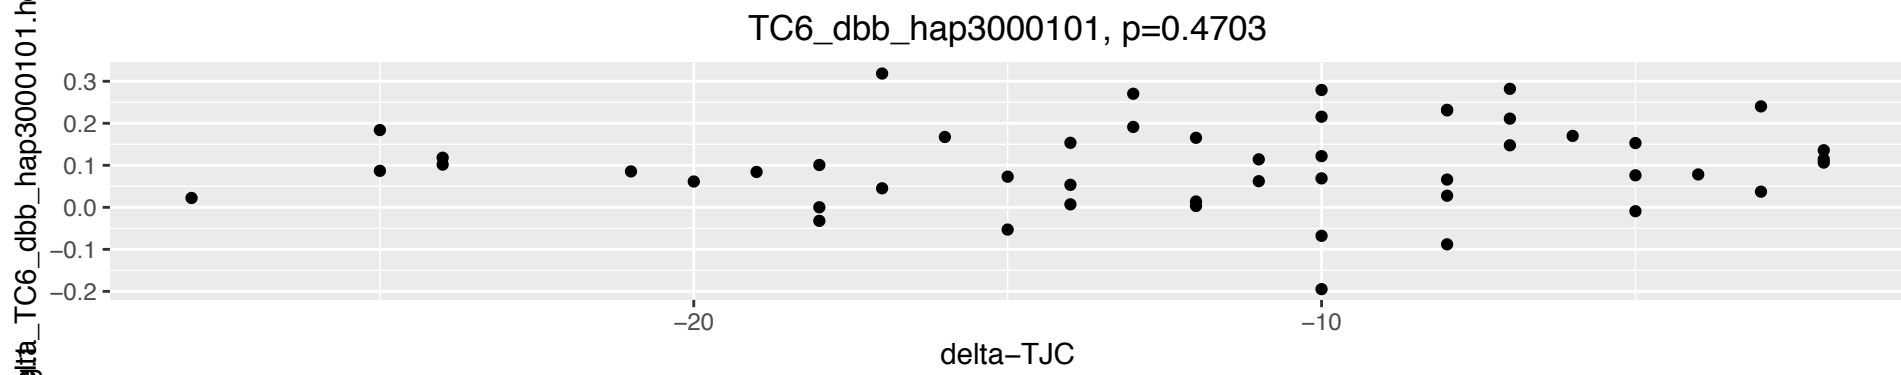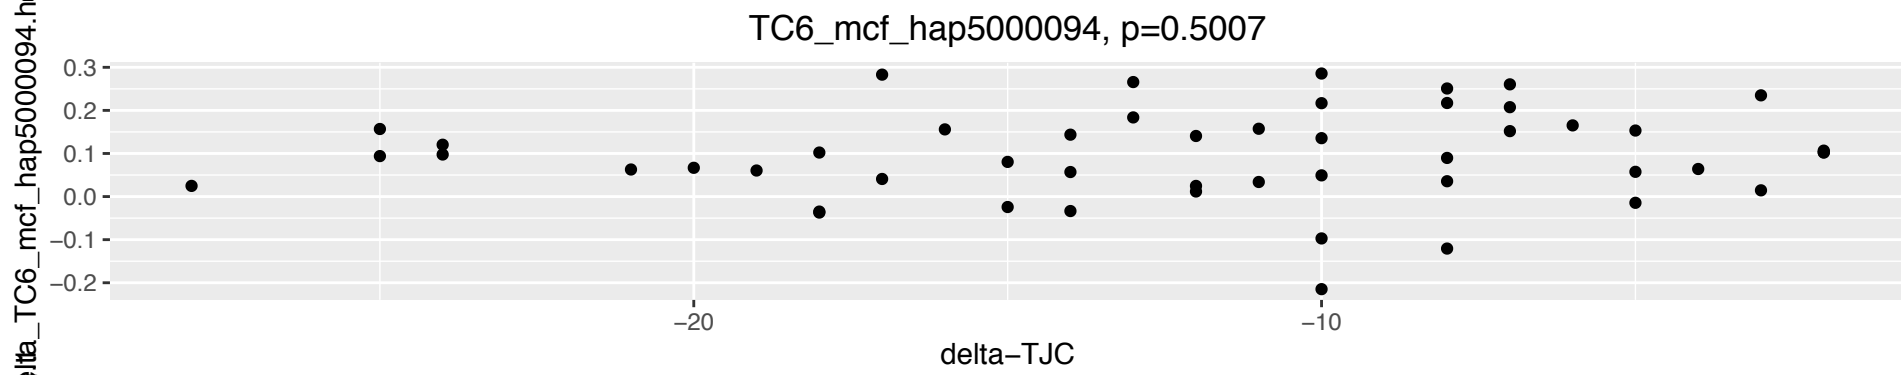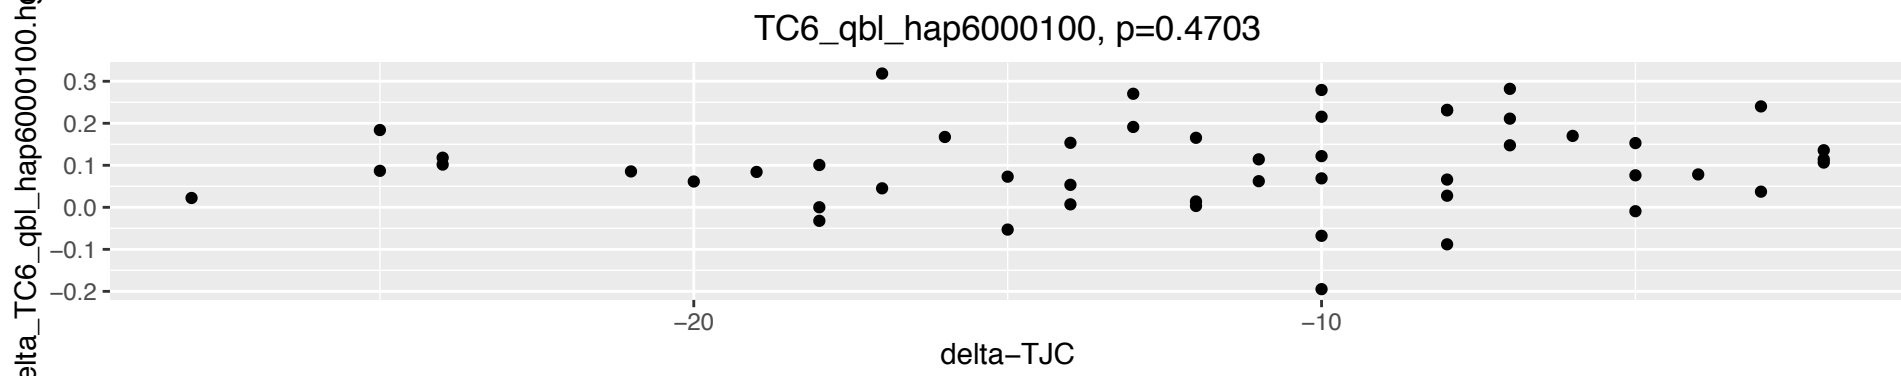

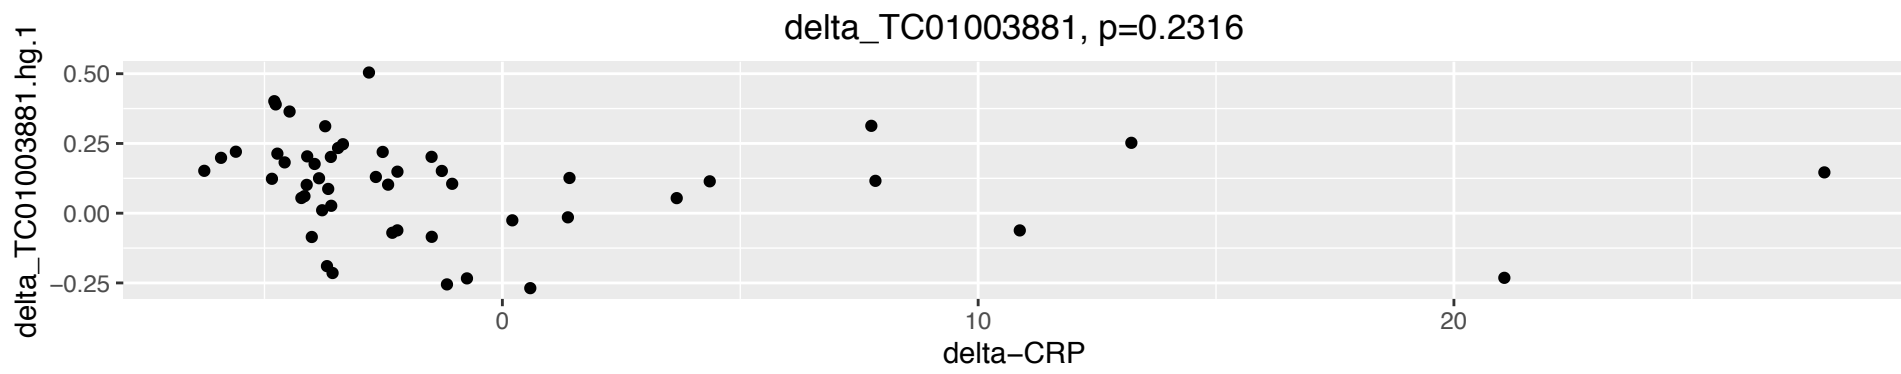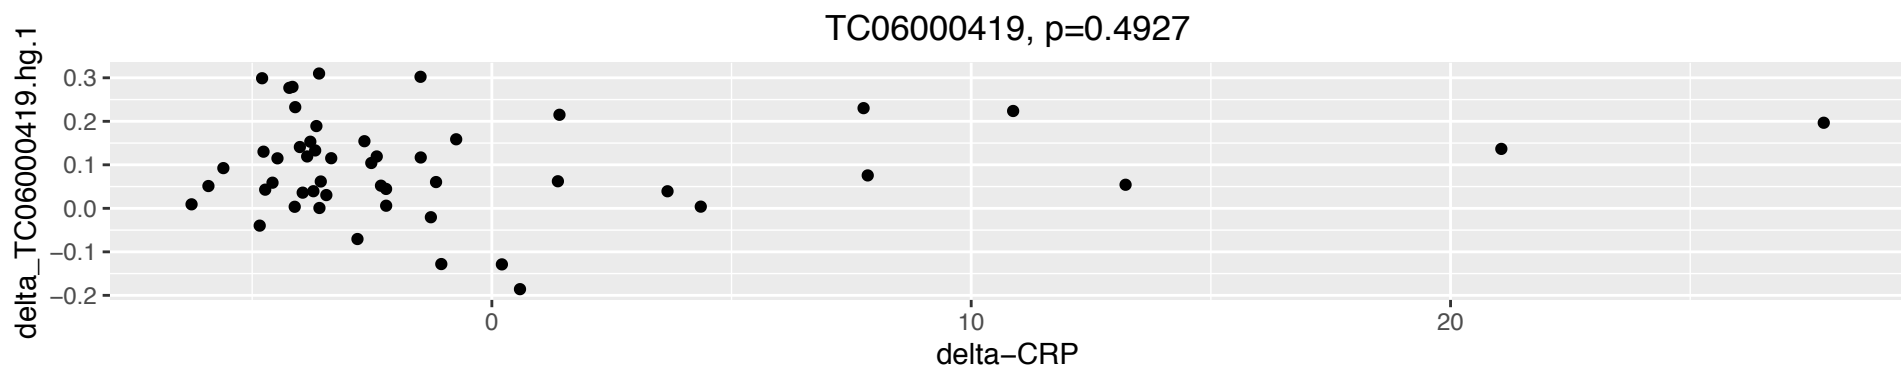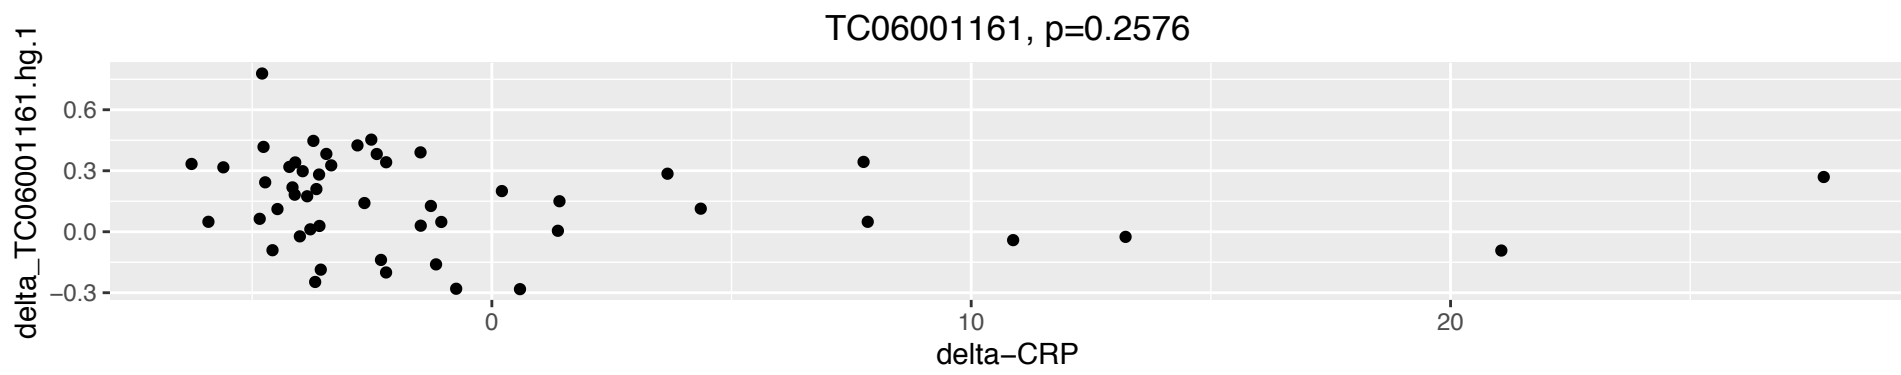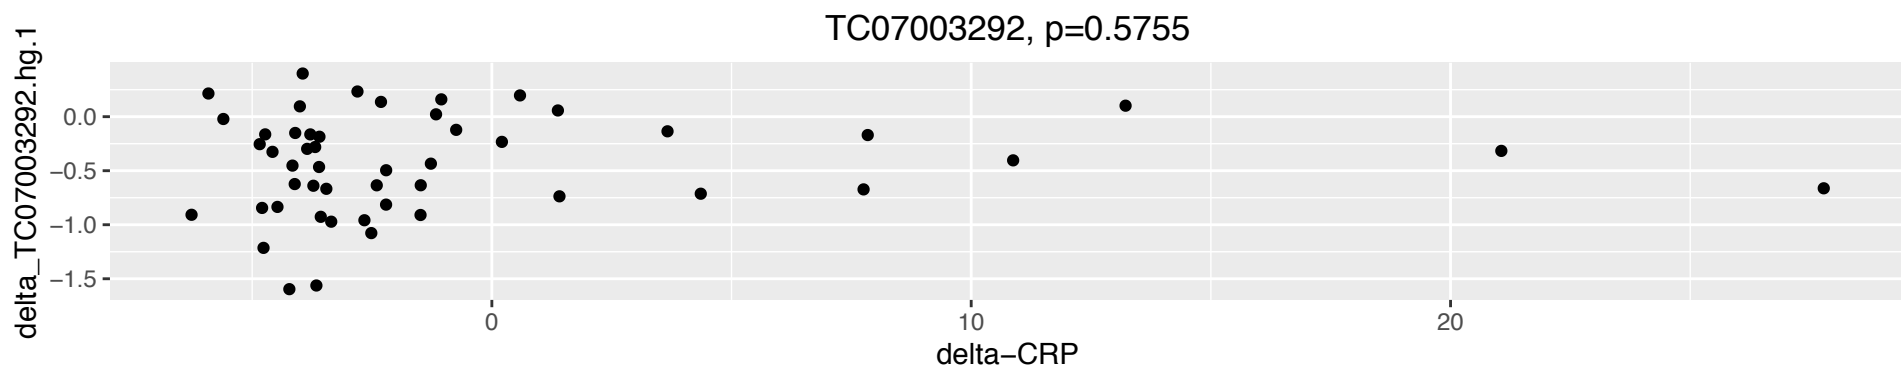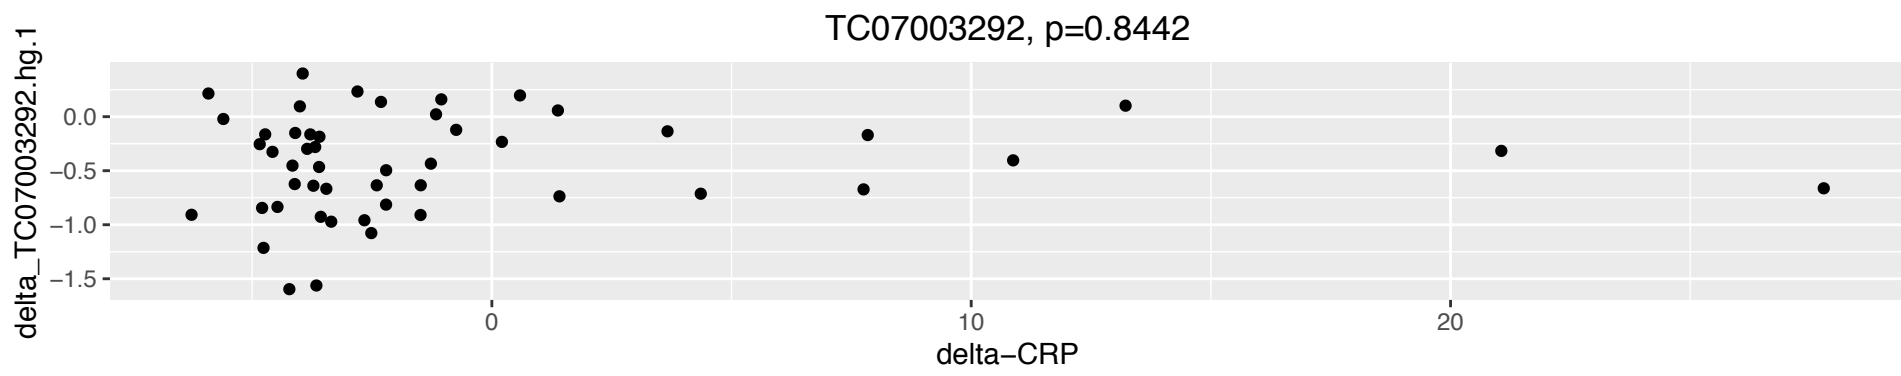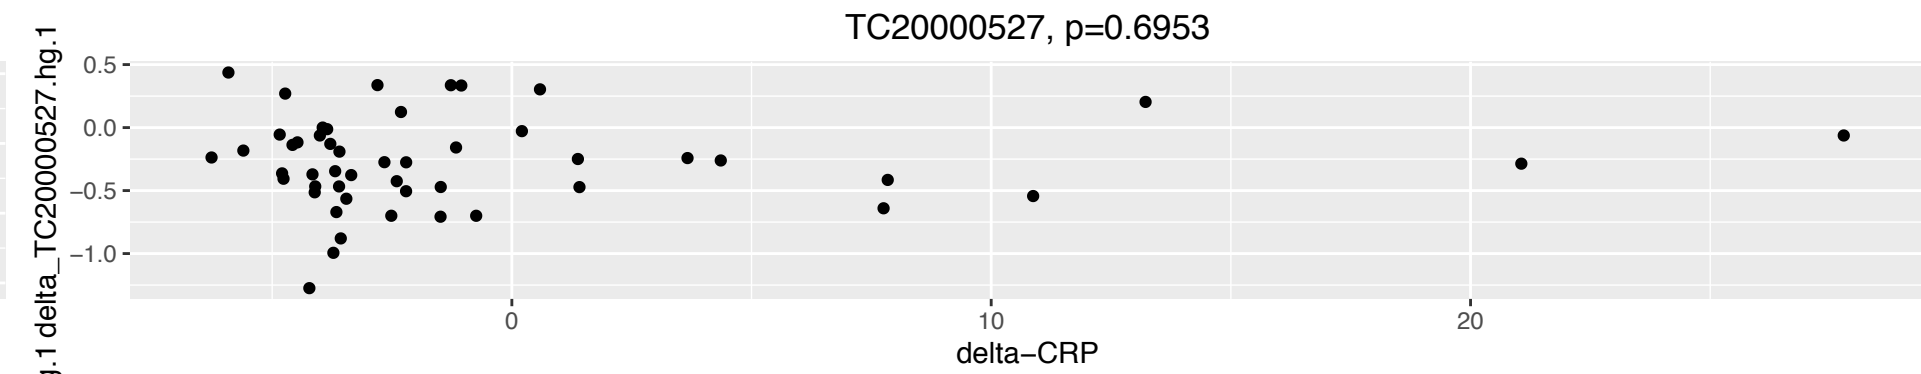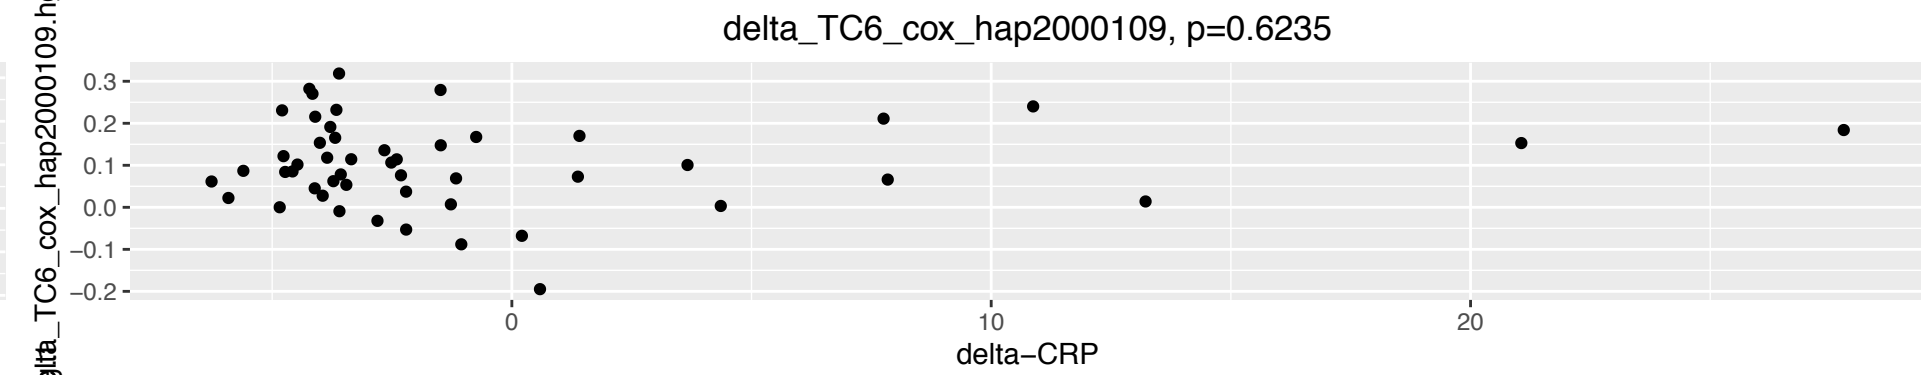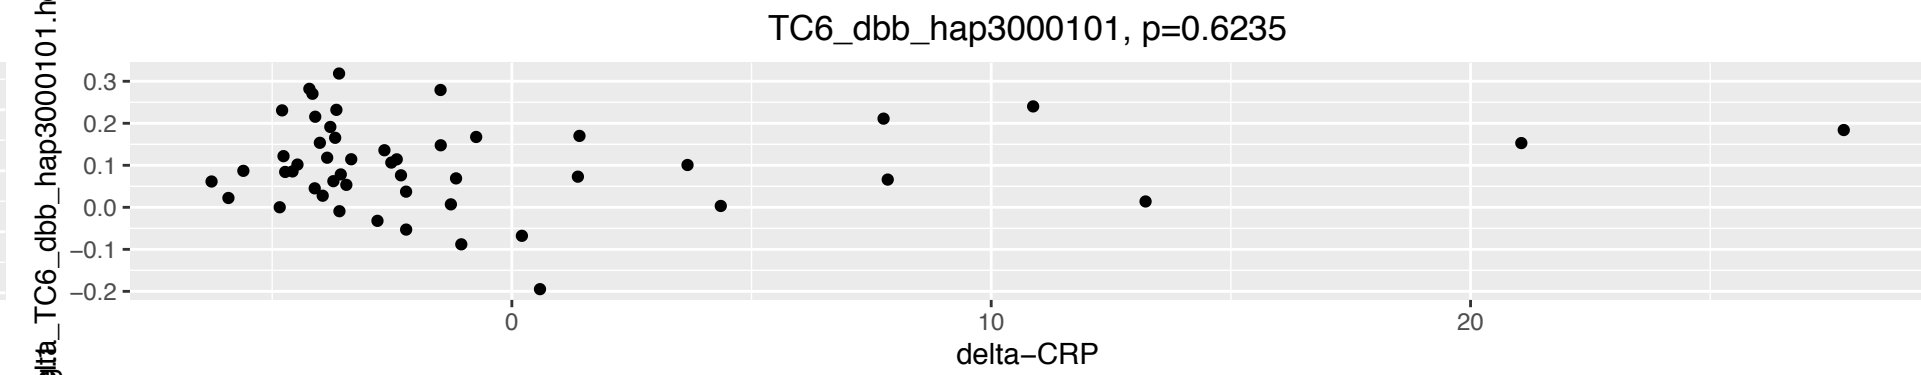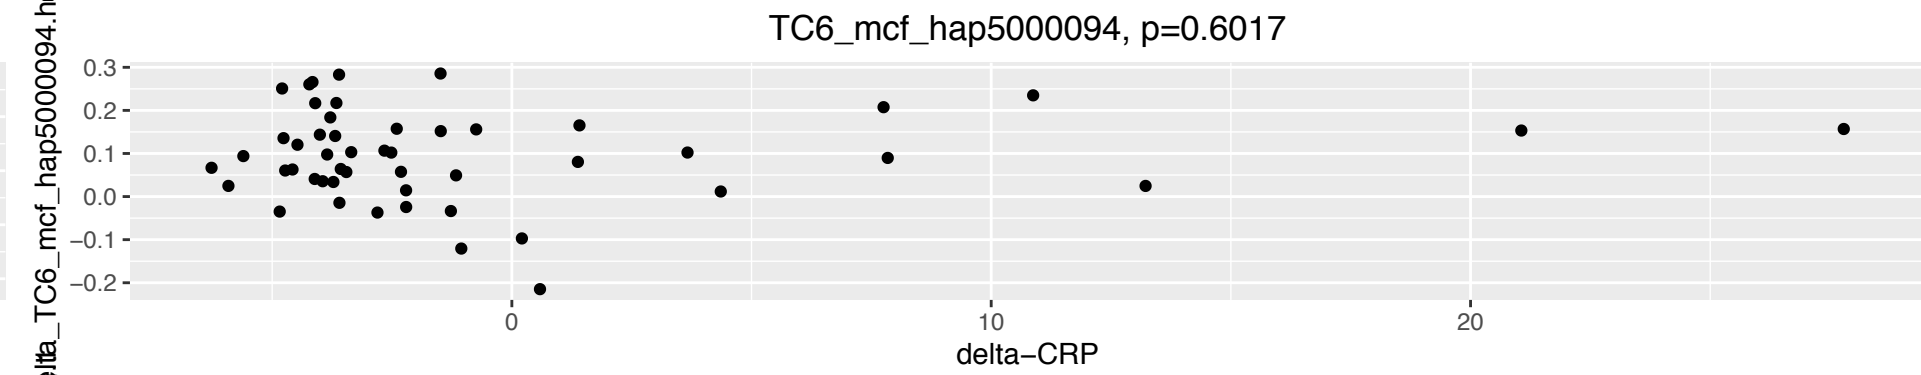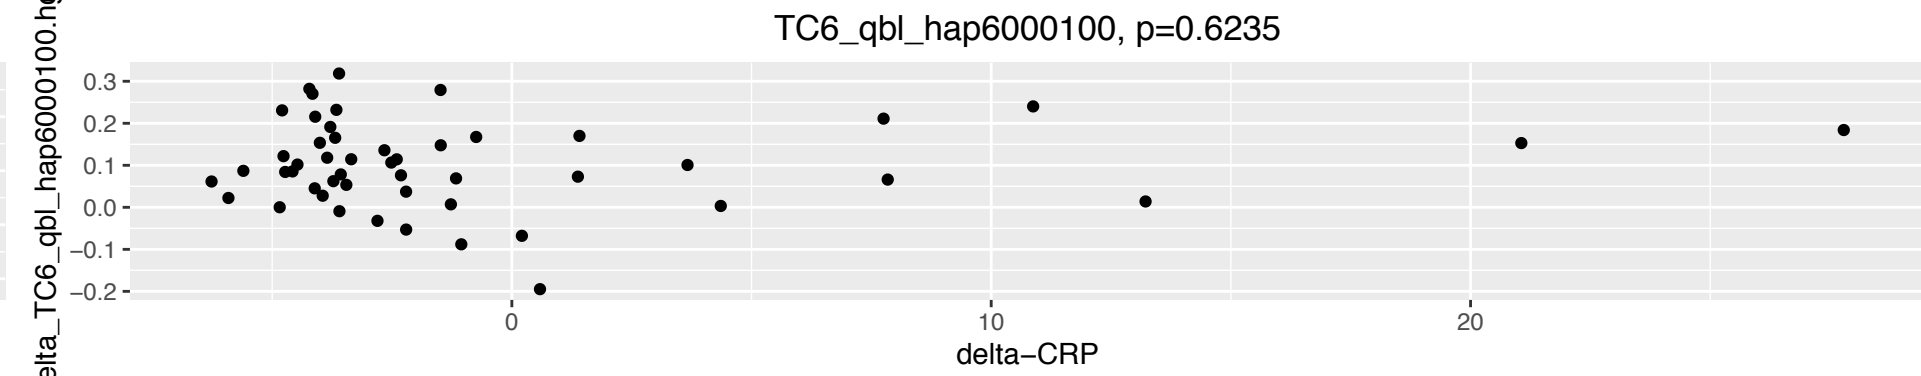

Supplement: 13075_2021_2451_MOESM3_ESM.pdf [file 13075_2021_2451_MOESM3_ESM.pdf]
