# Supplementary material for: Transcriptome-wide study of TNF-inhibitor therapy in rheumatoid arthritis reveals early signature of successful treatment
Source: PubMed Central journal article supplement (PMC7948368; doi:10.1186/s13075-021-02451-9), 2021-03-10
Supplement: 13075_2021_2451_MOESM1_ESM.pdf [file 13075_2021_2451_MOESM1_ESM.pdf]

| transcriptclusterid | Fold change | AveExpr | t     | P.Value  | adj.P.Val | B     | probesetid | seqname | strand | start     | stop      | totalprobes | geneassignment | mrnaassignment |
|---------------------|-------------|---------|-------|----------|-----------|-------|------------|---------|--------|-----------|-----------|-------------|----------------|----------------|
| TC11001447.hg.1     | -1.6        | 6.64    | -4.66 | 7.46E-06 | 3.58E-04  | 3.49  | TC11001447 | chr11   | -      | 15593569  | 15643937  | 30          |                | ENSEMBL        |
| TC09001921.hg.1     | -1.6        | 7.31    | -4.31 | 3.09E-05 | 9.22E-04  | 2.17  | TC09001921 | chr9    | +      | 40332917  | 40337603  | 30          |                | Broad          |
| TC09001920.hg.1     | -1.6        | 8.1     | -4.08 | 7.65E-05 | 1.74E-03  | 1.33  | TC09001920 | chr9    | +      | 40308216  | 40324812  | 58          |                | Broad          |
| TC09000274.hg.1     | -1.6        | 7.63    | -4.1  | 6.99E-05 | 1.63E-03  | 1.42  | TC09000274 | chr9    | +      | 65647281  | 65664071  | 50          | CNTP3B         | GenBank        |
| TC09001960.hg.1     | -1.6        | 7.88    | -4.28 | 3.47E-05 | 9.93E-04  | 2.06  | TC09001960 | chr9    | +      | 65629315  | 65635808  | 30          |                | Broad          |
| TC20000363.hg.1     | -1.6        | 9.71    | -6.57 | 9.48E-10 | 6.72E-06  | 11.9  | TC20000363 | chr20   | +      | 44637547  | 44645200  | 180         | MMP9           | RefSeq         |
| TC07002629.hg.1     | -1.6        | 7.25    | -5.92 | 2.48E-08 | 1.54E-05  | 8.82  | TC07002629 | chr7    | +      | 141870970 | 141923474 | 280         |                | Rinn           |
| TC03003258.hg.1     | -1.5        | 6.08    | -4.73 | 5.48E-06 | 2.98E-04  | 3.77  | TC03003258 | chr3    | -      | 187553660 | 187574106 | 18          |                | Rinn           |
| TC01000272.hg.1     | -1.5        | 9.31    | -4.74 | 5.26E-06 | 2.93E-04  | 3.81  | TC01000272 | chr1    | +      | 21835858  | 21904905  | 185         | ALPL           | RefSeq         |
| TC07000902.hg.1     | -1.5        | 6.72    | -5.81 | 4.20E-08 | 2.01E-05  | 8.33  | TC07000902 | chr7    | +      | 141811549 | 141921088 | 570         | LOC100124692   | RefSeq         |
| TC09001097.hg.1     | -1.5        | 8.17    | -4.4  | 2.18E-05 | 7.26E-04  | 2.5   | TC09001097 | chr9    | -      | 40498481  | 40633261  | 80          | CNTP3P2        | GenBank        |
| TC09002504.hg.1     | -1.5        | 8.68    | -4.31 | 3.14E-05 | 9.30E-04  | 2.16  | TC09002504 | chr9    | -      | 40501701  | 40503928  | 40          |                | NONCODE        |
| TC02003445.hg.1     | -1.5        | 6.91    | -5.44 | 2.36E-07 | 4.86E-05  | 6.71  | TC02003445 | chr2    | +      | 102661125 | 102674449 | 30          |                | Rinn           |
| TC09000231.hg.1     | -1.5        | 6.05    | -4.34 | 2.75E-05 | 8.49E-04  | 2.28  | TC09000231 | chr9    | +      | 40028620  | 40032417  | 30          | AL353791.1     | Havana         |
| TC09001092.hg.1     | -1.5        | 7.96    | -4.41 | 2.08E-05 | 7.01E-04  | 2.54  | TC09001092 | chr9    | -      | 39072764  | 39288456  | 446         | CNTP3          | RefSeq         |
| TC06000983.hg.1     | -1.5        | 6.76    | -4.88 | 2.84E-06 | 2.03E-04  | 4.39  | TC06000983 | chr6    | +      | 131894284 | 131905472 | 179         | ARG1           | RefSeq         |
| TC04002881.hg.1     | -1.5        | 7.83    | -5.45 | 2.22E-07 | 4.70E-05  | 6.77  | TC04002881 | chr4    | -      | 185719451 | 185720200 | 30          | SLED1          | NONCODE        |
| TC19002237.hg.1     | -1.5        | 9.35    | -5.94 | 2.22E-08 | 1.48E-05  | 8.93  | TC19002237 | chr19   | +      | 55396829  | 55401144  | 30          | FCAR           | NONCODE        |
| TC07000899.hg.1     | -1.5        | 10.14   | -5.91 | 2.55E-08 | 1.54E-05  | 8.8   | TC07000899 | chr7    | +      | 141607613 | 141806547 | 844         | MGAM           | RefSeq         |
| TC01003260.hg.1     | -1.5        | 10.62   | -5.73 | 6.14E-08 | 2.29E-05  | 7.97  | TC01003260 | chr1    | -      | 153346181 | 153348125 | 50          | S100A12        | RefSeq         |
| TC15000927.hg.1     | -1.5        | 6.03    | -3.97 | 1.14E-04 | 2.35E-03  | 0.97  | TC15000927 | chr15   | +      | 94406338  | 94421585  | 80          | LOC101927153   | ENSEMBL        |
| TC15001935.hg.1     | -1.5        | 5.38    | -5.13 | 9.67E-07 | 1.10E-04  | 5.39  | TC15001935 | chr15   | -      | 97316932  | 97316961  | 6           |                | GenBank        |
| TC06002119.hg.1     | -1.5        | 7.45    | -3.86 | 1.74E-04 | 3.23E-03  | 0.58  | TC06002119 | chr6    | -      | 133001997 | 133035194 | 110         | VNN1           | RefSeq         |
| TC09000232.hg.1     | -1.5        | 9       | -4.56 | 1.14E-05 | 4.72E-04  | 3.1   | TC09000232 | chr9    | +      | 40311210  | 40311239  | 6           |                | GenBank        |
| TC04001810.hg.1     | -1.5        | 7.84    | -5.38 | 3.13E-07 | 5.69E-05  | 6.45  | TC04001810 | chr4    | -      | 185719450 | 185720200 | 30          | SLED1          | RefSeq         |
| TC09001937.hg.1     | -1.5        | 8.06    | -4.42 | 1.97E-05 | 6.78E-04  | 2.59  | TC09001937 | chr9    | +      | 43685063  | 43890529  | 236         |                | NONCODE        |
| TC20000341.hg.1     | -1.5        | 9.17    | -3.8  | 2.14E-04 | 3.74E-03  | 0.39  | TC20000341 | chr20   | +      | 43803517  | 43805185  | 30          | PI3            | RefSeq         |
| TC09001141.hg.1     | -1.5        | 6.98    | -4.18 | 5.08E-05 | 1.31E-03  | 1.71  | TC09001141 | chr9    | -      | 47295855  | 47314322  | 190         | LOC643792      | ENSEMBL        |
| TC0X001610.hg.1     | -1.5        | 7.23    | -6.12 | 9.08E-09 | 1.26E-05  | 9.77  | TC0X001610 | chrX    | +      | 17168618  | 17171104  | 30          | REPS2          | NONCODE        |
| TC04000437.hg.1     | -1.5        | 7.9     | -4.47 | 1.62E-05 | 5.95E-04  | 2.77  | TC04000437 | chr4    | +      | 79472673  | 79531605  | 233         | ANXA3          | RefSeq         |
| TC09002501.hg.1     | -1.5        | 8.81    | -4.57 | 1.09E-05 | 4.57E-04  | 3.14  | TC09002501 | chr9    | -      | 39722426  | 39817486  | 40          |                | Broad          |
| TC02000619.hg.1     | -1.5        | 7.66    | -4.92 | 2.41E-06 | 1.83E-04  | 4.54  | TC02000619 | chr2    | +      | 102608306 | 102645006 | 200         | IL1R2          | RefSeq         |
| TC0X000067.hg.1     | -1.5        | 6.04    | -5.84 | 3.66E-08 | 1.89E-05  | 8.46  | TC0X000067 | chrX    | +      | 15482369  | 15574652  | 257         | BMX            | RefSeq         |
| TC07002628.hg.1     | -1.5        | 6.33    | -5.87 | 3.04E-08 | 1.74E-05  | 8.63  | TC07002628 | chr7    | +      | 141811549 | 141843783 | 130         | LOC93432       | NONCODE        |
| TC15000928.hg.1     | -1.4        | 5.33    | -3.92 | 1.38E-04 | 2.70E-03  | 0.79  | TC15000928 | chr15   | +      | 94425311  | 94429972  | 30          |                | ENSEMBL        |
| TC09001919.hg.1     | -1.4        | 6.96    | -4.43 | 1.91E-05 | 6.65E-04  | 2.62  | TC09001919 | chr9    | +      | 40293022  | 40308427  | 60          |                | Broad          |
| TC09000253.hg.1     | -1.4        | 7.52    | -4.37 | 2.41E-05 | 7.75E-04  | 2.4   | TC09000253 | chr9    | +      | 43684885  | 43924049  | 440         | CNTP3B         | RefSeq         |
| TC07002513.hg.1     | -1.4        | 7.73    | -4.38 | 2.32E-05 | 7.59E-04  | 2.44  | TC07002513 | chr7    | +      | 106065909 | 106151990 | 25          |                | Rinn           |
| TC12001253.hg.1     | -1.4        | 8.06    | -6.55 | 1.07E-09 | 6.72E-06  | 11.78 | TC12001253 | chr12   | -      | 12482198  | 12503475  | 110         | MANSC1         | RefSeq         |
| TC12000130.hg.1     | -1.4        | 7.85    | -4.38 | 2.38E-05 | 7.71E-04  | 2.41  | TC12000130 | chr12   | +      | 8666136   | 8674962   | 60          | CLEC4D         | RefSeq         |
| TC19000134.hg.1     | -1.4        | 8.18    | -4.87 | 3.03E-06 | 2.12E-04  | 4.33  | TC19000134 | chr19   | +      | 7741943   | 7744719   | 80          | MCEMP1         | RefSeq         |
| TC07003054.hg.1     | -1.4        | 7.9     | -6.07 | 1.15E-08 | 1.43E-05  | 9.54  | TC07003054 | chr7    | -      | 87900207  | 87903065  | 30          |                | NONCODE        |
| TC02003322.hg.1     | -1.4        | 5.65    | -6.06 | 1.26E-08 | 1.43E-05  | 9.47  | TC02003322 | chr2    | +      | 71916293  | 71918581  | 30          |                | NONCODE        |
| TC05000097.hg.1     | -1.4        | 6.97    | -4.57 | 1.08E-05 | 4.54E-04  | 3.14  | TC05000097 | chr5    | +      | 17240720  | 17240824  | 30          | RNU6-1003P     | ENSEMBL        |
| TC02000620.hg.1     | -1.4        | 6.75    | -5.74 | 5.86E-08 | 2.29E-05  | 8.02  | TC02000620 | chr2    | +      | 102681004 | 102796334 | 326         | IL1R1          | RefSeq         |
| TC11002231.hg.1     | -1.4        | 5.78    | -2.86 | 4.96E-03 | 3.95E-02  | -2.44 | TC11002231 | chr11   | -      | 102582526 | 102595685 | 174         | MMP8           | RefSeq         |
| TC10000058.hg.1     | -1.4        | 7.16    | -4.37 | 2.44E-05 | 7.79E-04  | 2.39  | TC10000058 | chr10   | +      | 6392278   | 6394723   | 30          | DKFz667F0711   | ENSEMBL        |

|                 |      |       |       |          |          |       |                   |   |           |           |     |               |         |
|-----------------|------|-------|-------|----------|----------|-------|-------------------|---|-----------|-----------|-----|---------------|---------|
| TC01003498.hg.1 | -1.4 | 7.97  | -5.1  | 1.12E-06 | 1.19E-04 | 5.26  | TC01003498. chr1  | - | 169481192 | 169555826 | 320 | F5            | RefSeq  |
| TC02000937.hg.1 | -1.4 | 8.09  | -3.52 | 5.77E-04 | 7.75E-03 | -0.51 | TC02000937. chr2  | + | 152214106 | 152236562 | 98  | TNFAIP6       | RefSeq  |
| TC19001576.hg.1 | -1.4 | 7.57  | -3.03 | 2.96E-03 | 2.69E-02 | -1.98 | TC19001576. chr19 | - | 43084393  | 43099082  | 78  | CEACAM8       | RefSeq  |
| TC22000191.hg.1 | -1.4 | 8.06  | -4.39 | 2.21E-05 | 7.34E-04 | 2.48  | TC22000191. chr22 | + | 29469066  | 29564321  | 180 | KREMEN1       | RefSeq  |
| TC05000724.hg.1 | -1.4 | 6.75  | -4.97 | 1.96E-06 | 1.64E-04 | 4.73  | TC05000724. chr5  | + | 139579748 | 139582772 | 30  | CTB-131B5.2   | Havana  |
| TC05001068.hg.1 | -1.4 | 5.29  | -5.38 | 3.07E-07 | 5.62E-05 | 6.46  | TC05001068. chr5  | + | 180336838 | 180336927 | 30  |               | ENSEMBL |
| TC15002385.hg.1 | -1.4 | 6.75  | -5.39 | 2.97E-07 | 5.60E-05 | 6.5   | TC15002385. chr15 | + | 94785816  | 94821492  | 30  |               | NONCODE |
| TC04001809.hg.1 | -1.4 | 10.6  | -5.32 | 4.06E-07 | 6.61E-05 | 6.2   | TC04001809. chr4  | - | 185676749 | 185747972 | 344 | ACSL1         | RefSeq  |
| TC16000494.hg.1 | -1.4 | 9.71  | -5.26 | 5.28E-07 | 8.00E-05 | 5.96  | TC16000494. chr16 | + | 57702157  | 57723975  | 160 | GPR97         | RefSeq  |
| TC04001267.hg.1 | -1.4 | 8.45  | -5.54 | 1.48E-07 | 3.84E-05 | 7.15  | TC04001267. chr4  | - | 70592566  | 70653679  | 150 | SULT1B1       | RefSeq  |
| TC06002274.hg.1 | -1.4 | 5.66  | -3.78 | 2.33E-04 | 3.97E-03 | 0.31  | TC06002274. chr6  | - | 160060339 | 160061133 | 30  |               | ENSEMBL |
| TC07003216.hg.1 | -1.4 | 5.92  | -3.84 | 1.84E-04 | 3.36E-03 | 0.53  | TC07003216. chr7  | - | 142917561 | 142919360 | 30  |               | NONCODE |
| TC07003292.hg.1 | -1.4 | 6.13  | -6.24 | 5.00E-09 | 1.18E-05 | 10.33 | TC07003292. chr7  | + | 112120908 | 112130943 | 160 | LSMEM1        | RefSeq  |
| TC20000552.hg.1 | -1.4 | 6.4   | -6.03 | 1.41E-08 | 1.43E-05 | 9.35  | TC20000552. chr20 | - | 1509702   | 1509805   | 30  | RNU6-917P     | ENSEMBL |
| TC19002493.hg.1 | -1.4 | 7.07  | -2.96 | 3.65E-03 | 3.14E-02 | -2.17 | TC19002493. chr19 | - | 43084396  | 43099066  | 70  | CEACAM8       | NONCODE |
| TC19000885.hg.1 | -1.4 | 7.95  | -6.17 | 7.34E-09 | 1.26E-05 | 9.97  | TC19000885. chr19 | + | 55385549  | 55403244  | 152 | FCAR          | RefSeq  |
| TC14001125.hg.1 | -1.4 | 6.19  | -4.61 | 9.24E-06 | 4.08E-04 | 3.29  | TC14001125. chr14 | - | 51350294  | 51353947  | 30  |               | ENSEMBL |
| TC06003963.hg.1 | -1.4 | 5.65  | -3.79 | 2.21E-04 | 3.81E-03 | 0.36  | TC06003963. chr6  | - | 160060339 | 160061133 | 30  |               | Rinn    |
| TC03000846.hg.1 | -1.4 | 8.96  | -5.31 | 4.25E-07 | 6.80E-05 | 6.16  | TC03000846. chr3  | + | 154741913 | 154901518 | 480 | MME           | RefSeq  |
| TC02004178.hg.1 | -1.4 | 5.72  | -4.73 | 5.47E-06 | 2.98E-04 | 3.78  | TC02004178. chr2  | - | 40324916  | 40328505  | 30  | SLC8A1        | NONCODE |
| TC03001550.hg.1 | -1.4 | 9.87  | -4.88 | 2.94E-06 | 2.07E-04 | 4.36  | TC03001550. chr3  | - | 71820806  | 71834357  | 70  | PROK2         | RefSeq  |
| TC01000232.hg.1 | -1.4 | 8.83  | -5.87 | 3.10E-08 | 1.76E-05 | 8.62  | TC01000232. chr1  | + | 17634690  | 17690499  | 220 | PADI4         | RefSeq  |
| TC07002731.hg.1 | -1.4 | 7.6   | -5.02 | 1.61E-06 | 1.45E-04 | 4.92  | TC07002731. chr7  | - | 29246     | 31980     | 30  |               | NONCODE |
| TC16000660.hg.1 | -1.3 | 9.09  | -5.11 | 1.08E-06 | 1.17E-04 | 5.29  | TC16000660. chr16 | + | 84853537  | 84943116  | 220 | CRISPLD2      | RefSeq  |
| TC02000432.hg.1 | -1.3 | 9.23  | -5.56 | 1.36E-07 | 3.68E-05 | 7.23  | TC02000432. chr2  | + | 71680753  | 71913898  | 713 | DYSF          | RefSeq  |
| TC02000237.hg.1 | -1.3 | 8.24  | -6.04 | 1.37E-08 | 1.43E-05 | 9.38  | TC02000237. chr2  | + | 37571717  | 37600465  | 170 | PQCT          | RefSeq  |
| TC0X000082.hg.1 | -1.3 | 8.95  | -6.75 | 3.86E-10 | 5.23E-06 | 12.75 | TC0X000082. chrX  | + | 16964814  | 17171403  | 280 | REPS2         | RefSeq  |
| TC06001269.hg.1 | -1.3 | 6.69  | -4.54 | 1.19E-05 | 4.86E-04 | 3.05  | TC06001269. chr6  | - | 10762956  | 10838788  | 216 | MAK           | RefSeq  |
| TC01003677.hg.1 | -1.3 | 6.73  | -5.54 | 1.46E-07 | 3.81E-05 | 7.16  | TC01003677. chr1  | - | 200311672 | 200343482 | 80  | LINC00862     | RefSeq  |
| TC09002907.hg.1 | -1.3 | 6.51  | -4.77 | 4.60E-06 | 2.71E-04 | 3.94  | TC09002907. chr9  | + | 117085303 | 117088759 | 130 | ORM1          | RefSeq  |
| TC20000876.hg.1 | -1.3 | 8.04  | -4.21 | 4.57E-05 | 1.22E-03 | 1.81  | TC20000876. chr20 | - | 43880879  | 43883206  | 40  | SLPI          | RefSeq  |
| TC12001774.hg.1 | -1.3 | 5.1   | -5.01 | 1.66E-06 | 1.48E-04 | 4.89  | TC12001774. chr12 | - | 81329515  | 81329612  | 30  | MIR618        | RefSeq  |
| TC01001820.hg.1 | -1.3 | 7.1   | -6.33 | 3.32E-09 | 1.10E-05 | 10.72 | TC01001820. chr1  | + | 220960039 | 220987741 | 170 | Mar-01        | RefSeq  |
| TC12003061.hg.1 | -1.3 | 8.57  | -5.22 | 6.55E-07 | 8.91E-05 | 5.76  | TC12003061. chr12 | - | 106631814 | 106632649 | 30  |               | NONCODE |
| TC09001325.hg.1 | -1.3 | 7.36  | -6.17 | 7.04E-09 | 1.26E-05 | 10.01 | TC09001325. chr9  | - | 94171327  | 94186144  | 59  | NFIL3         | RefSeq  |
| TC10002758.hg.1 | -1.3 | 9.35  | -4.93 | 2.31E-06 | 1.78E-04 | 4.58  | TC10002758. chr10 | - | 89832454  | 89840364  | 30  |               | Rinn    |
| TC05001587.hg.1 | -1.3 | 6.83  | -4.66 | 7.28E-06 | 3.52E-04 | 3.51  | TC05001587. chr5  | - | 90522292  | 90522888  | 30  | RP11-414H23.3 | Havana  |
| TC06001669.hg.1 | -1.3 | 6.71  | -4.54 | 1.20E-05 | 4.87E-04 | 3.05  | TC06001669. chr6  | - | 35911291  | 35992645  | 330 | SLC26A8       | RefSeq  |
| TC14001124.hg.1 | -1.3 | 10.1  | -5.95 | 2.10E-08 | 1.43E-05 | 8.98  | TC14001124. chr14 | - | 51324609  | 51411454  | 250 | PYGL          | RefSeq  |
| TC10000629.hg.1 | -1.3 | 6.82  | -3.06 | 2.69E-03 | 2.50E-02 | -1.9  | TC10000629. chr10 | + | 90519952  | 90537999  | 110 | LIPN          | RefSeq  |
| TC01006029.hg.1 | -1.3 | 6.29  | -5.45 | 2.22E-07 | 4.70E-05 | 6.77  | TC01006029. chr1  | - | 200298333 | 200343319 | 89  | LINC00862     | NONCODE |
| TC03002534.hg.1 | -1.3 | 7.34  | -5.68 | 7.79E-08 | 2.63E-05 | 7.75  | TC03002534. chr3  | + | 128949393 | 128955149 | 40  |               | Rinn    |
| TC01000008.hg.1 | -1.3 | 9.35  | -4.9  | 2.67E-06 | 1.97E-04 | 4.45  | TC01000008. chr1  | + | 334140    | 342806    | 30  | LOC101928706  | ENSEMBL |
| TC10000258.hg.1 | -1.3 | 10.01 | -4.81 | 3.85E-06 | 2.45E-04 | 4.1   | TC10000258. chr10 | + | 38712553  | 38712656  | 30  | RNU6-1118P    | ENSEMBL |
| TC04001138.hg.1 | -1.3 | 6.5   | -3.97 | 1.14E-04 | 2.34E-03 | 0.97  | TC04001138. chr4  | - | 40504057  | 40504136  | 30  | MIR4802       | RefSeq  |
| TC01002055.hg.1 | -1.3 | 10.01 | -4.8  | 4.04E-06 | 2.52E-04 | 4.06  | TC01002055. chr1  | - | 157784    | 157887    | 30  | RNU6-1100P    | ENSEMBL |
| TC01003865.hg.1 | -1.3 | 10.01 | -4.8  | 4.04E-06 | 2.52E-04 | 4.06  | TC01003865. chr1  | - | 222676974 | 222677077 | 30  | RNU6-791P     | ENSEMBL |
| TC04001502.hg.1 | -1.3 | 10.01 | -4.8  | 4.04E-06 | 2.52E-04 | 4.06  | TC04001502. chr4  | - | 120355160 | 120355263 | 30  | RNU6-1217P    | ENSEMBL |

|                 |      |       |       |          |          |       |                   |   |           |           |     |              |         |
|-----------------|------|-------|-------|----------|----------|-------|-------------------|---|-----------|-----------|-----|--------------|---------|
| TC09000858.hg.1 | -1.3 | 10.01 | -4.8  | 4.04E-06 | 2.52E-04 | 4.06  | TC09000858. chr9  | + | 141150045 | 141150148 | 30  | RNU6-785P    | ENSEMBL |
| TC16000715.hg.1 | -1.3 | 10.01 | -4.8  | 4.04E-06 | 2.52E-04 | 4.06  | TC16000715. chr16 | + | 90211000  | 90211103  | 30  | RNU6-355P    | ENSEMBL |
| TC19000980.hg.1 | -1.3 | 10.01 | -4.8  | 4.04E-06 | 2.52E-04 | 4.06  | TC19000980. chr19 | - | 223158    | 223261    | 30  | RNU6-1076P   | ENSEMBL |
| TC11001227.hg.1 | -1.3 | 10.01 | -4.8  | 4.11E-06 | 2.54E-04 | 4.04  | TC11001227. chr11 | - | 152999    | 153102    | 30  | RNU6-447P    | ENSEMBL |
| TC11000812.hg.1 | -1.3 | 9.31  | -5.97 | 1.96E-08 | 1.43E-05 | 9.05  | TC11000812. chr11 | + | 75479777  | 75512581  | 120 | DGAT2        | RefSeq  |
| TC01000261.hg.1 | -1.3 | 9.46  | -5.8  | 4.37E-08 | 2.06E-05 | 8.29  | TC01000261. chr1  | + | 20915441  | 20945401  | 78  | CDA          | RefSeq  |
| TC05001087.hg.1 | -1.3 | 9.16  | -4.73 | 5.55E-06 | 3.00E-04 | 3.76  | TC05001087. chr5  | + | 180728968 | 180729071 | 30  | RNU6-705P    | ENSEMBL |
| TC04000776.hg.1 | -1.3 | 6.05  | -4.08 | 7.46E-05 | 1.71E-03 | 1.36  | TC04000776. chr4  | + | 154641479 | 154648874 | 50  | RP11-153M7.5 | Havana  |
| TC13001678.hg.1 | -1.3 | 3.95  | -3.56 | 5.12E-04 | 7.09E-03 | -0.4  | TC13001678. chr13 | - | 110053200 | 110054833 | 28  |              | Rinn    |
| TC14002079.hg.1 | -1.3 | 8.57  | -5.1  | 1.10E-06 | 1.18E-04 | 5.27  | TC14002079. chr14 | - | 73925556  | 73932873  | 82  |              | Rinn    |
| TC09001263.hg.1 | -1.3 | 3.97  | -4.32 | 2.93E-05 | 8.89E-04 | 2.22  | TC09001263. chr9  | - | 84534684  | 84534718  | 11  |              | GenBank |
| TC09001269.hg.1 | -1.3 | 3.97  | -4.32 | 2.93E-05 | 8.89E-04 | 2.22  | TC09001269. chr9  | - | 84549756  | 84549790  | 11  |              | GenBank |
| TC12001772.hg.1 | -1.3 | 8.15  | -6.48 | 1.55E-09 | 8.73E-06 | 11.43 | TC12001772. chr12 | - | 81186299  | 81331704  | 120 | LIN7A        | RefSeq  |
| TC04000826.hg.1 | -1.3 | 8.03  | -5.38 | 3.06E-07 | 5.62E-05 | 6.47  | TC04000826. chr4  | + | 166128770 | 166244308 | 310 | KLHL2        | RefSeq  |
| TC01003974.hg.1 | -1.3 | 7.57  | -4.67 | 7.00E-06 | 3.43E-04 | 3.55  | TC01003974. chr1  | - | 232533711 | 232697304 | 330 | SIPA1L2      | RefSeq  |
| TC03002096.hg.1 | -1.3 | 10.54 | -5.33 | 3.93E-07 | 6.49E-05 | 6.23  | TC03002096. chr3  | - | 187439165 | 187463515 | 243 | BCL6         | RefSeq  |
| TC12002978.hg.1 | -1.3 | 7.37  | -5.48 | 1.99E-07 | 4.45E-05 | 6.87  | TC12002978. chr12 | - | 81186299  | 81189685  | 30  |              | NONCODE |
| TC10001860.hg.1 | -1.3 | 9.87  | -4.5  | 1.45E-05 | 5.53E-04 | 2.87  | TC10001860. chr10 | + | 6266130   | 6275053   | 30  | PFKFB3       | NONCODE |
| TC05003140.hg.1 | -1.3 | 7.18  | -4.54 | 1.22E-05 | 4.92E-04 | 3.03  | TC05003140. chr5  | - | 90538753  | 90560495  | 30  |              | Rinn    |
| TC12002425.hg.1 | -1.3 | 9.03  | -4.72 | 5.67E-06 | 3.03E-04 | 3.74  | TC12002425. chr12 | + | 66645119  | 66647711  | 30  | IRAK3        | NONCODE |
| TC01002071.hg.1 | -1.3 | 9.6   | -4.76 | 4.80E-06 | 2.78E-04 | 3.9   | TC01002071. chr1  | - | 693613    | 693716    | 30  | RNU6-1199P   | ENSEMBL |
| TC06002120.hg.1 | -1.3 | 8.13  | -4.51 | 1.40E-05 | 5.39E-04 | 2.9   | TC06002120. chr6  | - | 133043923 | 133055904 | 174 | VNN3         | RefSeq  |
| TC12001842.hg.1 | -1.3 | 8.57  | -5.11 | 1.07E-06 | 1.16E-04 | 5.3   | TC12001842. chr12 | - | 96366440  | 96390143  | 274 | HAL          | RefSeq  |
| TC20000726.hg.1 | -1.3 | 8.87  | -6.16 | 7.63E-09 | 1.26E-05 | 9.93  | TC20000726. chr20 | - | 24943561  | 24973615  | 120 | APMAP        | RefSeq  |
| TC05000633.hg.1 | -1.3 | 7.83  | -5.33 | 4.00E-07 | 6.56E-05 | 6.22  | TC05000633. chr5  | + | 131630136 | 131679899 | 140 | SLC22A4      | RefSeq  |
| TC01005541.hg.1 | -1.3 | 7.27  | -5.37 | 3.31E-07 | 5.89E-05 | 6.39  | TC01005541. chr1  | - | 65450881  | 65451399  | 29  |              | Broad   |
| TC20001235.hg.1 | -1.3 | 9     | -3.77 | 2.43E-04 | 4.09E-03 | 0.28  | TC20001235. chr20 | + | 43808589  | 43821571  | 82  |              | Rinn    |
| TC08000873.hg.1 | -1.3 | 8.79  | -4.59 | 9.77E-06 | 4.24E-04 | 3.24  | TC08000873. chr8  | - | 142091    | 150563    | 30  |              | ENSEMBL |
| TC19000274.hg.1 | -1.3 | 9.01  | -5.6  | 1.11E-07 | 3.24E-05 | 7.42  | TC19000274. chr19 | + | 15751695  | 15773634  | 235 | CYP4F3       | RefSeq  |
| TC18000436.hg.1 | -1.3 | 7.79  | -3.72 | 2.86E-04 | 4.59E-03 | 0.13  | TC18000436. chr18 | - | 28645940  | 28682388  | 240 | DSC2         | RefSeq  |
| TC10000057.hg.1 | -1.3 | 6.93  | -4.9  | 2.65E-06 | 1.96E-04 | 4.45  | TC10000057. chr10 | + | 6319650   | 6377938   | 70  | LOC399715    | RefSeq  |
| TC15000930.hg.1 | -1.3 | 8.72  | -5.43 | 2.54E-07 | 5.02E-05 | 6.64  | TC15000930. chr15 | + | 94774767  | 95027181  | 414 | MCTP2        | RefSeq  |
| TC04001355.hg.1 | -1.3 | 8.84  | -5.14 | 9.44E-07 | 1.10E-04 | 5.41  | TC04001355. chr4  | - | 85590693  | 85887544  | 888 | WDFY3        | RefSeq  |
| TC07000669.hg.1 | -1.3 | 7     | -4.5  | 1.45E-05 | 5.53E-04 | 2.87  | TC07000669. chr7  | + | 102613969 | 102629303 | 40  | NFE4         | ENSEMBL |
| TC07001582.hg.1 | -1.3 | 9.72  | -5.49 | 1.87E-07 | 4.29E-05 | 6.93  | TC07001582. chr7  | - | 87900207  | 87936228  | 90  | STEAP4       | RefSeq  |
| TC09000344.hg.1 | -1.3 | 6.48  | -5.01 | 1.68E-06 | 1.49E-04 | 4.88  | TC09000344. chr9  | + | 77812987  | 77813093  | 30  | RNU6-1228P   | ENSEMBL |
| TC12002238.hg.1 | -1.3 | 4.11  | -6.27 | 4.48E-09 | 1.18E-05 | 10.44 | TC12002238. chr12 | + | 10393135  | 10412929  | 30  |              | Rinn    |
| TC12002078.hg.1 | -1.3 | 9.03  | -5.15 | 8.74E-07 | 1.06E-04 | 5.49  | TC12002078. chr12 | - | 123185840 | 123187904 | 40  | HCAR2        | RefSeq  |
| TC09002505.hg.1 | -1.3 | 8.28  | -4.53 | 1.28E-05 | 5.08E-04 | 2.99  | TC09002505. chr9  | - | 40610094  | 40633391  | 30  |              | NONCODE |
| TC07002504.hg.1 | -1.3 | 6.78  | -4.28 | 3.47E-05 | 9.94E-04 | 2.06  | TC07002504. chr7  | + | 102613969 | 102629303 | 40  | NFE4         | NONCODE |
| TC15000441.hg.1 | -1.3 | 11.01 | -5.68 | 7.79E-08 | 2.63E-05 | 7.75  | TC15000441. chr15 | + | 58430368  | 58478110  | 134 | AQP9         | RefSeq  |
| TC04000606.hg.1 | -1.3 | 9.71  | -4.44 | 1.81E-05 | 6.42E-04 | 2.67  | TC04000606. chr4  | + | 119527605 | 119527708 | 30  | RNU6-1054P   | ENSEMBL |
| TC19001640.hg.1 | -1.3 | 7.79  | -5.26 | 5.50E-07 | 8.12E-05 | 5.92  | TC19001640. chr19 | - | 46522412  | 46526556  | 50  | PGLYRP1      | RefSeq  |
| TC06003619.hg.1 | -1.3 | 9.04  | -5.07 | 1.28E-06 | 1.28E-04 | 5.13  | TC06003619. chr6  | - | 35800811  | 35888957  | 152 | SRPK1        | NONCODE |
| TC10001861.hg.1 | -1.3 | 6.89  | -4.54 | 1.21E-05 | 4.89E-04 | 3.04  | TC10001861. chr10 | + | 6319650   | 6377937   | 120 | LOC399715    | NONCODE |
| TC09001435.hg.1 | -1.3 | 5.26  | -5.36 | 3.39E-07 | 5.89E-05 | 6.37  | TC09001435. chr9  | - | 107606051 | 107606603 | 30  |              | GenBank |
| TC12000745.hg.1 | -1.3 | 5.61  | -4.3  | 3.19E-05 | 9.42E-04 | 2.14  | TC12000745. chr12 | + | 96419101  | 96421749  | 30  |              | ENSEMBL |
| TC17000736.hg.1 | -1.3 | 6.77  | -6.71 | 4.65E-10 | 5.23E-06 | 12.57 | TC17000736. chr17 | + | 58227297  | 58248260  | 110 | CA4          | RefSeq  |

|                 |      |       |       |          |          |       |                   |   |           |           |     |                |         |
|-----------------|------|-------|-------|----------|----------|-------|-------------------|---|-----------|-----------|-----|----------------|---------|
| TC06003854.hg.1 | -1.3 | 8.74  | -4.47 | 1.63E-05 | 5.97E-04 | 2.76  | TC06003854. chr6  | - | 133043926 | 133055904 | 70  | VNN3           | NONCODE |
| TC06001668.hg.1 | -1.3 | 8.22  | -5.26 | 5.32E-07 | 8.01E-05 | 5.95  | TC06001668. chr6  | - | 35800743  | 35889119  | 364 | SRPK1          | RefSeq  |
| TC05001601.hg.1 | -1.3 | 7.08  | -4.62 | 8.66E-06 | 3.92E-04 | 3.35  | TC05001601. chr5  | - | 93486556  | 93954309  | 302 | KIAA0825       | RefSeq  |
| TC11003373.hg.1 | -1.3 | 8.03  | -4.76 | 4.87E-06 | 2.80E-04 | 3.88  | TC11003373. chr11 | - | 118097406 | 118099840 | 30  |                | NONCODE |
| TC05003444.hg.1 | -1.3 | 8.81  | -4.82 | 3.77E-06 | 2.43E-04 | 4.12  | TC05003444. chr5  | + | 180756242 | 180769214 | 30  | AC138035.1     | Havana  |
| TC12000591.hg.1 | -1.3 | 9.31  | -5    | 1.74E-06 | 1.53E-04 | 4.84  | TC12000591. chr12 | + | 66582659  | 66648402  | 183 | IRAK3          | RefSeq  |
| TC04000248.hg.1 | -1.3 | 5.85  | -4.45 | 1.75E-05 | 6.27E-04 | 2.7   | TC04000248. chr4  | + | 40751914  | 40812002  | 220 | NSUN7          | RefSeq  |
| TC01005194.hg.1 | -1.3 | 8.92  | -4.65 | 7.78E-06 | 3.67E-04 | 3.45  | TC01005194. chr1  | - | 684275    | 703869    | 100 | RP11-206L10.2  | NONCODE |
| TC08001996.hg.1 | -1.3 | 4.34  | -4.19 | 4.90E-05 | 1.28E-03 | 1.74  | TC08001996. chr8  | + | 82066546  | 82075134  | 50  |                | Rinn    |
| TC02002219.hg.1 | -1.3 | 8.5   | -5.31 | 4.24E-07 | 6.80E-05 | 6.16  | TC02002219. chr2  | - | 113587328 | 113594480 | 197 | IL1B           | RefSeq  |
| TC05000983.hg.1 | -1.3 | 7.5   | -4.3  | 3.16E-05 | 9.33E-04 | 2.15  | TC05000983. chr5  | + | 175130901 | 175131007 | 30  | RNU6-226P      | ENSEMBL |
| TC20000928.hg.1 | -1.3 | 9.75  | -5.37 | 3.32E-07 | 5.89E-05 | 6.39  | TC20000928. chr20 | - | 48249482  | 48330421  | 120 | B4GALT5        | RefSeq  |
| TC08001654.hg.1 | -1.3 | 6.96  | -4.12 | 6.54E-05 | 1.55E-03 | 1.48  | TC08001654. chr8  | - | 133584320 | 133687838 | 267 | LRRC6          | RefSeq  |
| TC16000098.hg.1 | -1.3 | 8.84  | -5.48 | 1.95E-07 | 4.41E-05 | 6.89  | TC16000098. chr16 | + | 3096682   | 3110724   | 140 | MMP25          | RefSeq  |
| TC15001837.hg.1 | -1.3 | 10.58 | -5.46 | 2.18E-07 | 4.67E-05 | 6.78  | TC15001837. chr15 | - | 90328120  | 90358094  | 230 | ANPEP          | RefSeq  |
| TC12001027.hg.1 | -1.3 | 9.94  | -5.76 | 5.29E-08 | 2.18E-05 | 8.11  | TC12001027. chr12 | + | 129337979 | 129469509 | 170 | GLT1D1         | RefSeq  |
| TC07002222.hg.1 | -1.3 | 10.74 | -5.47 | 2.04E-07 | 4.49E-05 | 6.85  | TC07002222. chr7  | + | 28863333  | 28865505  | 30  | CREB5          | NONCODE |
| TC07002730.hg.1 | -1.3 | 9.24  | -5.25 | 5.69E-07 | 8.23E-05 | 5.89  | TC07002730. chr7  | - | 26392     | 35472     | 30  |                | Rinn    |
| TC02003748.hg.1 | -1.3 | 7.72  | -4.57 | 1.08E-05 | 4.54E-04 | 3.14  | TC02003748. chr2  | + | 192556795 | 192583257 | 110 |                | NONCODE |
| TC07000405.hg.1 | -1.3 | 7.15  | -4.21 | 4.51E-05 | 1.21E-03 | 1.82  | TC07000405. chr7  | + | 65670186  | 65885530  | 149 | TPST1          | RefSeq  |
| TC07001067.hg.1 | -1.3 | 9.88  | -4.94 | 2.26E-06 | 1.77E-04 | 4.6   | TC07001067. chr7  | - | 19757     | 35479     | 40  |                | ENSEMBL |
| TC06000699.hg.1 | -1.3 | 4.52  | -5.73 | 5.99E-08 | 2.29E-05 | 8     | TC06000699. chr6  | + | 64516729  | 64532535  | 30  | RP11-59D5__B.2 | Havana  |
| TC05000075.hg.1 | -1.3 | 7.46  | -6.01 | 1.62E-08 | 1.43E-05 | 9.23  | TC05000075. chr5  | + | 10441636  | 10472141  | 133 | ROPN1L         | RefSeq  |
| TC10000053.hg.1 | -1.3 | 8.4   | -4.82 | 3.81E-06 | 2.44E-04 | 4.11  | TC10000053. chr10 | + | 6186843   | 6277507   | 325 | PFKFB3         | RefSeq  |
| TC03000423.hg.1 | -1.3 | 7.66  | -6.03 | 1.41E-08 | 1.43E-05 | 9.36  | TC03000423. chr3  | + | 71803201  | 71805647  | 30  | GPR27          | RefSeq  |
| TC01001738.hg.1 | -1.3 | 10.48 | -4.75 | 5.08E-06 | 2.87E-04 | 3.84  | TC01001738. chr1  | + | 207669473 | 207815110 | 560 | CR1            | RefSeq  |
| TC07001920.hg.1 | -1.3 | 7.52  | -5.56 | 1.36E-07 | 3.68E-05 | 7.23  | TC07001920. chr7  | - | 139993493 | 140104233 | 495 | SLC37A3        | RefSeq  |
| TC12001179.hg.1 | -1.3 | 7.32  | -2.74 | 6.88E-03 | 5.06E-02 | -2.73 | TC12001179. chr12 | - | 8700957   | 8720209   | 30  |                | ENSEMBL |
| TC05001641.hg.1 | -1.3 | 8.95  | -4.13 | 6.19E-05 | 1.49E-03 | 1.53  | TC05001641. chr5  | - | 101569690 | 101632253 | 150 | SLCO4C1        | RefSeq  |
| TC19001241.hg.1 | -1.3 | 10.35 | -6.02 | 1.51E-08 | 1.43E-05 | 9.29  | TC19001241. chr19 | - | 14729929  | 14785730  | 190 | EMR3           | RefSeq  |
| TC01005706.hg.1 | -1.3 | 8.07  | -5.15 | 8.80E-07 | 1.06E-04 | 5.48  | TC01005706. chr1  | - | 112265426 | 112268060 | 30  | FAM212B        | NONCODE |
| TC07001714.hg.1 | -1.3 | 6.16  | -4    | 1.03E-04 | 2.16E-03 | 1.06  | TC07001714. chr7  | - | 102453308 | 102715288 | 335 | FBXL13         | RefSeq  |
| TC20001489.hg.1 | -1.3 | 7.83  | -3.42 | 8.30E-04 | 1.02E-02 | -0.84 | TC20001489. chr20 | - | 23052184  | 23053359  | 30  |                | NONCODE |
| TC08002537.hg.1 | -1.3 | 9.19  | -3.85 | 1.83E-04 | 3.35E-03 | 0.53  | TC08002537. chr8  | - | 133697316 | 133699876 | 27  |                | Rinn    |
| TC01003878.hg.1 | -1.3 | 9.21  | -4.57 | 1.08E-05 | 4.53E-04 | 3.15  | TC01003878. chr1  | - | 224163848 | 224163951 | 30  | RNU6-1319P     | ENSEMBL |
| TC01004037.hg.1 | -1.3 | 9.21  | -4.57 | 1.08E-05 | 4.53E-04 | 3.15  | TC01004037. chr1  | - | 243244458 | 243244561 | 30  | RNU6-747P      | ENSEMBL |
| TC07000284.hg.1 | -1.3 | 9.21  | -4.57 | 1.08E-05 | 4.53E-04 | 3.15  | TC07000284. chr7  | + | 45829184  | 45829287  | 30  | RNU6-241P      | ENSEMBL |
| TC08000908.hg.1 | -1.3 | 6.43  | -2.91 | 4.27E-03 | 3.53E-02 | -2.31 | TC08000908. chr8  | - | 6793344   | 6795860   | 60  | DEFA4          | RefSeq  |
| TC01005186.hg.1 | -1.3 | 9.04  | -4.72 | 5.78E-06 | 3.07E-04 | 3.72  | TC01005186. chr1  | - | 154268    | 163727    | 70  | RP11-34P13.13  | NONCODE |
| TC06004062.hg.1 | -1.3 | 8.28  | -5.68 | 7.88E-08 | 2.64E-05 | 7.74  | TC06004062. chr6  | + | 2994232   | 3019996   | 150 | NQO2           | RefSeq  |
| TC04001442.hg.1 | -1.3 | 6.39  | -3.83 | 1.96E-04 | 3.50E-03 | 0.47  | TC04001442. chr4  | - | 106058437 | 106061776 | 30  | LOC101929491   | ENSEMBL |
| TC05001766.hg.1 | -1.3 | 8.11  | -5.84 | 3.60E-08 | 1.88E-05 | 8.48  | TC05001766. chr5  | - | 131755108 | 131762406 | 40  | AC116366.5     | Havana  |
| TC09001434.hg.1 | -1.3 | 7.67  | -4.33 | 2.90E-05 | 8.84E-04 | 2.23  | TC09001434. chr9  | - | 107543283 | 107690527 | 579 | ABCA1          | RefSeq  |
| TC20001380.hg.1 | -1.3 | 4.87  | -4.82 | 3.81E-06 | 2.44E-04 | 4.11  | TC20001380. chr20 | - | 1732662   | 1746252   | 40  | RP5-968J1.1    | NONCODE |
| TC04001356.hg.1 | -1.3 | 7.04  | -4.85 | 3.29E-06 | 2.24E-04 | 4.25  | TC04001356. chr4  | - | 85807539  | 85807639  | 30  | RNU6-469P      | ENSEMBL |
| TC02001300.hg.1 | -1.3 | 9.61  | -5.72 | 6.52E-08 | 2.36E-05 | 7.92  | TC02001300. chr2  | + | 219246752 | 219261617 | 446 | SLC11A1        | RefSeq  |
| TC01002419.hg.1 | -1.3 | 8.41  | -5.2  | 6.95E-07 | 9.12E-05 | 5.7   | TC01002419. chr1  | - | 28469248  | 28469352  | 30  | RNU6-176P      | ENSEMBL |
| TC06001785.hg.1 | -1.3 | 5.56  | -3.62 | 4.12E-04 | 6.09E-03 | -0.21 | TC06001785. chr6  | - | 49695092  | 49712168  | 128 | CRISP3         | RefSeq  |

|                 |      |       |       |          |          |       |                   |   |           |           |     |               |         |
|-----------------|------|-------|-------|----------|----------|-------|-------------------|---|-----------|-----------|-----|---------------|---------|
| TC07000776.hg.1 | -1.3 | 7.99  | -4.67 | 6.99E-06 | 3.43E-04 | 3.55  | TC07000776. chr7  | + | 128267226 | 128267329 | 30  | RNU6-177P     | ENSEMBL |
| TC02004035.hg.1 | -1.3 | 6.74  | -4.8  | 4.13E-06 | 2.55E-04 | 4.04  | TC02004035. chr2  | - | 8992820   | 8994376   | 30  | MBOAT2        | NONCODE |
| TC12001170.hg.1 | -1.3 | 10.35 | -5.39 | 2.95E-07 | 5.58E-05 | 6.5   | TC12001170. chr12 | - | 8071824   | 8088892   | 240 | SLC2A3        | RefSeq  |
| TC19000788.hg.1 | -1.3 | 8.44  | -4.62 | 8.69E-06 | 3.93E-04 | 3.35  | TC19000788. chr19 | + | 52264183  | 52273779  | 59  | FPR2          | RefSeq  |
| TC01004862.hg.1 | -1.3 | 5.29  | -5.04 | 1.43E-06 | 1.37E-04 | 5.03  | TC01004862. chr1  | + | 180100864 | 180103986 | 21  |               | Rinn    |
| TC17001903.hg.1 | -1.3 | 8.68  | -5.42 | 2.59E-07 | 5.07E-05 | 6.62  | TC17001903. chr17 | - | 74561461  | 74582145  | 120 | ST6GALC2      | RefSeq  |
| TC02004438.hg.1 | -1.3 | 5.67  | -3.77 | 2.40E-04 | 4.06E-03 | 0.29  | TC02004438. chr2  | - | 101845073 | 101851475 | 35  |               | NONCODE |
| TC10002530.hg.1 | -1.3 | 8.42  | -4.83 | 3.65E-06 | 2.38E-04 | 4.15  | TC10002530. chr10 | - | 29933707  | 29935702  | 30  |               | NONCODE |
| TC08001844.hg.1 | -1.3 | 7.95  | -4.89 | 2.82E-06 | 2.03E-04 | 4.39  | TC08001844. chr8  | + | 25272426  | 25273231  | 30  |               | NONCODE |
| TC20001393.hg.1 | -1.3 | 9.99  | -5.14 | 9.41E-07 | 1.10E-04 | 5.42  | TC20001393. chr20 | - | 3907958   | 3911562   | 30  |               | NONCODE |
| TC11002997.hg.1 | -1.3 | 6.79  | -5.83 | 3.71E-08 | 1.89E-05 | 8.45  | TC11002997. chr11 | - | 1792623   | 1793111   | 30  |               | Rinn    |
| TC01006030.hg.1 | -1.3 | 6.72  | -4.94 | 2.22E-06 | 1.75E-04 | 4.61  | TC01006030. chr1  | - | 200374083 | 200375228 | 30  | ZNF281        | NONCODE |
| TC06003141.hg.1 | -1.3 | 6.42  | -4.28 | 3.49E-05 | 9.96E-04 | 2.06  | TC06003141. chr6  | + | 155569226 | 155575172 | 60  | TIAM2         | NONCODE |
| TC01004955.hg.1 | -1.3 | 5.72  | -4.15 | 5.77E-05 | 1.42E-03 | 1.59  | TC01004955. chr1  | + | 202530389 | 202530835 | 30  |               | NONCODE |
| TC07000406.hg.1 | -1.3 | 4.42  | -3.04 | 2.85E-03 | 2.62E-02 | -1.95 | TC07000406. chr7  | + | 65809291  | 65809401  | 30  | RNU6-313P     | ENSEMBL |
| TC06002755.hg.1 | -1.3 | 6.54  | -4.07 | 7.80E-05 | 1.76E-03 | 1.32  | TC06002755. chr6  | + | 36084167  | 36091301  | 23  |               | Rinn    |
| TC11002689.hg.1 | -1.3 | 8.78  | -5.11 | 1.06E-06 | 1.16E-04 | 5.31  | TC11002689. chr11 | + | 59570202  | 59573350  | 30  | STX3          | NONCODE |
| TC08001264.hg.1 | -1.3 | 6.21  | -4.85 | 3.31E-06 | 2.24E-04 | 4.24  | TC08001264. chr8  | - | 62413115  | 62627199  | 689 | ASPH          | RefSeq  |
| TC06003643.hg.1 | -1.3 | 7.29  | -4.73 | 5.50E-06 | 2.99E-04 | 3.77  | TC06003643. chr6  | - | 41215572  | 41216548  | 40  | ADCY10P1      | NONCODE |
| TC02000412.hg.1 | -1.3 | 9.4   | -4.47 | 1.60E-05 | 5.92E-04 | 2.78  | TC02000412. chr2  | + | 70157400  | 70160078  | 30  |               | UCSC    |
| TC22000224.hg.1 | -1.3 | 8.91  | -4.98 | 1.91E-06 | 1.62E-04 | 4.76  | TC22000224. chr22 | + | 31608225  | 31676066  | 320 | LIMK2         | RefSeq  |
| TC21000718.hg.1 | -1.3 | 9.96  | -3.02 | 3.04E-03 | 2.75E-02 | -2.01 | TC21000718. chr21 | + | 39610955  | 39617014  | 30  | BRWD1-AS1     | NONCODE |
| TC14000781.hg.1 | -1.3 | 8.54  | -5.69 | 7.54E-08 | 2.59E-05 | 7.78  | TC14000781. chr14 | + | 102829299 | 102968818 | 319 | TECPR2        | RefSeq  |
| TC19002672.hg.1 | -1.3 | 8.18  | -5.27 | 5.23E-07 | 7.97E-05 | 5.97  | TC19002672. chr19 | - | 4537227   | 4540092   | 60  | LRG1          | RefSeq  |
| TC01002287.hg.1 | -1.3 | 9.16  | -3.83 | 1.94E-04 | 3.48E-03 | 0.48  | TC01002287. chr1  | - | 17393256  | 17445948  | 240 | PADI2         | RefSeq  |
| TC01000014.hg.1 | -1.3 | 6.18  | -4.48 | 1.57E-05 | 5.84E-04 | 2.8   | TC01000014. chr1  | + | 696291    | 697369    | 30  | RP11-206L10.4 | Havana  |
| TC02003610.hg.1 | -1.3 | 7     | -5.15 | 8.96E-07 | 1.07E-04 | 5.46  | TC02003610. chr2  | + | 139362080 | 139370737 | 30  |               | Rinn    |
| TC01004100.hg.1 | -1.3 | 5.73  | -4.1  | 7.07E-05 | 1.64E-03 | 1.41  | TC01004100. chr1  | + | 160446    | 161525    | 30  |               | Rinn    |
| TC01000004.hg.1 | -1.3 | 6.22  | -4.06 | 8.18E-05 | 1.83E-03 | 1.27  | TC01000004. chr1  | + | 160446    | 161525    | 30  | RP11-34P13.9  | Havana  |
| TC12002520.hg.1 | -1.3 | 10.33 | -5.95 | 2.10E-08 | 1.43E-05 | 8.98  | TC12002520. chr12 | + | 94656297  | 94701451  | 118 | PLXNC1        | NONCODE |
| TC01004103.hg.1 | -1.3 | 9.23  | -4.69 | 6.49E-06 | 3.32E-04 | 3.62  | TC01004103. chr1  | + | 329784    | 342806    | 32  |               | Broad   |
| TC20000553.hg.1 | -1.3 | 8.1   | -6.74 | 3.99E-10 | 5.23E-06 | 12.71 | TC20000553. chr20 | - | 1514897   | 1539489   | 70  | SIRPD         | RefSeq  |
| TC03002601.hg.1 | -1.3 | 5.98  | -5.13 | 9.70E-07 | 1.10E-04 | 5.39  | TC03002601. chr3  | + | 150608647 | 150610167 | 30  |               | Rinn    |
| TC01001882.hg.1 | -1.3 | 10.09 | -4.68 | 6.89E-06 | 3.41E-04 | 3.56  | TC01001882. chr1  | + | 228160169 | 228160213 | 21  |               | GenBank |
| TC01003855.hg.1 | -1.3 | 10.09 | -4.68 | 6.89E-06 | 3.41E-04 | 3.56  | TC01003855. chr1  | - | 222646723 | 222646767 | 21  | LOC100132062  | GenBank |
| TC10000547.hg.1 | -1.3 | 8.08  | -4.62 | 8.86E-06 | 3.97E-04 | 3.33  | TC10000547. chr10 | + | 79540986  | 79541016  | 7   |               | GenBank |
| TC02003274.hg.1 | -1.3 | 9.15  | -4.39 | 2.27E-05 | 7.48E-04 | 2.45  | TC02003274. chr2  | + | 64501019  | 64550940  | 30  |               | Rinn    |
| TC19001261.hg.1 | -1.3 | 7.59  | -6.02 | 1.48E-08 | 1.43E-05 | 9.31  | TC19001261. chr19 | - | 15988834  | 16008884  | 160 | CYP4F2        | RefSeq  |
| TC06001717.hg.1 | -1.3 | 10.11 | -4.49 | 1.49E-05 | 5.62E-04 | 2.84  | TC06001717. chr6  | - | 41242999  | 41254457  | 64  | TREM1         | RefSeq  |
| TC02000895.hg.1 | -1.3 | 7.07  | -5.06 | 1.33E-06 | 1.30E-04 | 5.09  | TC02000895. chr2  | + | 139362080 | 139370737 | 30  | AC092620.3    | Havana  |
| TC05000984.hg.1 | -1.3 | 9.14  | -4.47 | 1.65E-05 | 6.04E-04 | 2.75  | TC05000984. chr5  | + | 175136606 | 175137759 | 30  |               | Havana  |
| TC10001562.hg.1 | -1.3 | 9.42  | -6.03 | 1.43E-08 | 1.43E-05 | 9.35  | TC10001562. chr10 | - | 99092254  | 99094466  | 30  | FRAT2         | RefSeq  |
| TC20001490.hg.1 | -1.3 | 8.84  | -3.7  | 3.12E-04 | 4.92E-03 | 0.05  | TC20001490. chr20 | - | 23053705  | 23061258  | 40  | LINC00656     | NONCODE |
| TC13001428.hg.1 | -1.3 | 4.91  | -5.88 | 2.92E-08 | 1.71E-05 | 8.67  | TC13001428. chr13 | - | 37717104  | 37720855  | 30  |               | NONCODE |
| TC06003006.hg.1 | -1.3 | 8.3   | -4.91 | 2.56E-06 | 1.91E-04 | 4.48  | TC06003006. chr6  | + | 114178524 | 114182980 | 80  | MARCKS        | NONCODE |
| TC0X002222.hg.1 | -1.3 | 4.24  | -3.75 | 2.57E-04 | 4.26E-03 | 0.22  | TC0X002222. chrX  | - | 123509753 | 123510852 | 30  | TENM1         | NONCODE |
| TC02003749.hg.1 | -1.3 | 8.6   | -4.01 | 9.88E-05 | 2.11E-03 | 1.1   | TC02003749. chr2  | + | 192559982 | 192563100 | 30  |               | Rinn    |
| TC12000730.hg.1 | -1.3 | 10.32 | -5.98 | 1.87E-08 | 1.43E-05 | 9.09  | TC12000730. chr12 | + | 94542499  | 94701451  | 378 | PLXNC1        | RefSeq  |

|                 |      |       |       |          |          |       |                   |   |           |           |     |                      |
|-----------------|------|-------|-------|----------|----------|-------|-------------------|---|-----------|-----------|-----|----------------------|
| TC10002842.hg.1 | -1.3 | 6.16  | -3.82 | 2.01E-04 | 3.57E-03 | 0.45  | TC10002842. chr10 | - | 116579688 | 116581199 | 23  | Rinn                 |
| TC06000909.hg.1 | -1.3 | 8.68  | -4.95 | 2.14E-06 | 1.73E-04 | 4.65  | TC06000909. chr6  | + | 114178527 | 114184652 | 60  | MARCKS RefSeq        |
| TC06001205.hg.1 | -1.3 | 8.65  | -4.94 | 2.24E-06 | 1.76E-04 | 4.61  | TC06001205. chr6  | - | 131910    | 144885    | 30  | LINC00266-3 ENSEMBL  |
| TC07000252.hg.1 | -1.3 | 5.75  | -4.67 | 7.10E-06 | 3.46E-04 | 3.53  | TC07000252. chr7  | + | 39807940  | 39808043  | 30  | RNU6-719P ENSEMBL    |
| TC09002363.hg.1 | -1.3 | 8.4   | -4.62 | 8.67E-06 | 3.92E-04 | 3.35  | TC09002363. chr9  | + | 141139721 | 141142607 | 30  | Rinn                 |
| TC02001910.hg.1 | -1.3 | 4.48  | -4.71 | 6.04E-06 | 3.16E-04 | 3.68  | TC02001910. chr2  | - | 64313484  | 64315380  | 30  | AC012368.1 Havana    |
| TC21000168.hg.1 | -1.3 | 11.1  | -3.77 | 2.40E-04 | 4.06E-03 | 0.29  | TC21000168. chr21 | + | 39645398  | 39647443  | 30  | GenBank              |
| TC21000167.hg.1 | -1.3 | 9.56  | -3.82 | 2.01E-04 | 3.57E-03 | 0.45  | TC21000167. chr21 | + | 39628663  | 39673748  | 240 | KCNJ15 RefSeq        |
| TC04002305.hg.1 | -1.3 | 6.46  | -5.07 | 1.27E-06 | 1.27E-04 | 5.14  | TC04002305. chr4  | + | 166143201 | 166144207 | 30  | NONCODE              |
| TC07003322.hg.1 | -1.3 | 6.42  | -4.95 | 2.17E-06 | 1.74E-04 | 4.64  | TC07003322. chr7  | + | 37888199  | 37940003  | 225 | NME8 RefSeq          |
| TC01004954.hg.1 | -1.3 | 7.87  | -3.74 | 2.66E-04 | 4.36E-03 | 0.19  | TC01004954. chr1  | + | 202518232 | 202523878 | 30  | NONCODE              |
| TC01005192.hg.1 | -1.3 | 8.59  | -4.68 | 6.74E-06 | 3.37E-04 | 3.58  | TC01005192. chr1  | - | 637316    | 659930    | 73  | Broad                |
| TC12000744.hg.1 | -1.3 | 9.06  | -4.55 | 1.17E-05 | 4.81E-04 | 3.07  | TC12000744. chr12 | + | 96390299  | 96405267  | 40  | ENSEMBL              |
| TC21000719.hg.1 | -1.3 | 11.1  | -3.73 | 2.79E-04 | 4.51E-03 | 0.15  | TC21000719. chr21 | + | 39645398  | 39647441  | 30  | NONCODE              |
| TC06001153.hg.1 | -1.3 | 8.7   | -4.67 | 7.13E-06 | 3.46E-04 | 3.53  | TC06001153. chr6  | + | 160514114 | 160517244 | 30  | LOC729603 RefSeq     |
| TC02000978.hg.1 | -1.3 | 9.17  | -5.66 | 8.60E-08 | 2.77E-05 | 7.66  | TC02000978. chr2  | + | 163175350 | 163228105 | 290 | GCA RefSeq           |
| TC07001761.hg.1 | -1.3 | 6.91  | -3.47 | 6.91E-04 | 8.91E-03 | -0.68 | TC07001761. chr7  | - | 111366164 | 111846466 | 809 | DOCK4 RefSeq         |
| TC04002929.hg.1 | -1.3 | 8.29  | -5.76 | 5.35E-08 | 2.18E-05 | 8.1   | TC04002929. chr4  | + | 15704573  | 15739936  | 179 | BST1 RefSeq          |
| TC09002715.hg.1 | -1.3 | 5.33  | -4.91 | 2.54E-06 | 1.90E-04 | 4.49  | TC09002715. chr9  | - | 107606051 | 107606603 | 30  | NONCODE              |
| TC12001773.hg.1 | -1.3 | 5.3   | -5.07 | 1.27E-06 | 1.27E-04 | 5.14  | TC12001773. chr12 | - | 81226312  | 81226408  | 30  | MIR617 RefSeq        |
| TC05002656.hg.1 | -1.3 | 8.64  | -4.41 | 2.09E-05 | 7.05E-04 | 2.53  | TC05002656. chr5  | + | 139554736 | 139623371 | 30  | CYSTM1 NONCODE       |
| TC20000959.hg.1 | -1.3 | 6.31  | -5.53 | 1.59E-07 | 3.99E-05 | 7.08  | TC20000959. chr20 | - | 52491040  | 52492248  | 30  | SUMO1P1 RefSeq       |
| TC09002184.hg.1 | -1.3 | 8.87  | -5.25 | 5.58E-07 | 8.17E-05 | 5.9   | TC09002184. chr9  | + | 115142189 | 115234685 | 100 | HSDL2 NONCODE        |
| TC11000751.hg.1 | -1.3 | 7.64  | -3.52 | 5.78E-04 | 7.77E-03 | -0.51 | TC11000751. chr11 | + | 71846756  | 71850936  | 80  | FOLR3 RefSeq         |
| TC07001416.hg.1 | -1.3 | 6.64  | -4.73 | 5.43E-06 | 2.97E-04 | 3.78  | TC07001416. chr7  | - | 56469763  | 56469866  | 30  | RNU6-1052P ENSEMBL   |
| TC04002243.hg.1 | -1.3 | 7.51  | -5.96 | 1.97E-08 | 1.43E-05 | 9.04  | TC04002243. chr4  | + | 146298061 | 146299109 | 30  | NONCODE              |
| TC02002670.hg.1 | -1.3 | 8.86  | -4.85 | 3.26E-06 | 2.23E-04 | 4.26  | TC02002670. chr2  | - | 201838441 | 201936394 | 355 | FAM126B RefSeq       |
| TC13000644.hg.1 | -1.3 | 7.67  | -4.77 | 4.73E-06 | 2.75E-04 | 3.91  | TC13000644. chr13 | - | 46916137  | 47012325  | 314 | KIAA0226L RefSeq     |
| TC05002606.hg.1 | -1.3 | 5.34  | -4.44 | 1.83E-05 | 6.46E-04 | 2.66  | TC05002606. chr5  | + | 126190650 | 126192242 | 30  | NONCODE              |
| TC07003321.hg.1 | -1.3 | 7.15  | -5.21 | 6.66E-07 | 9.02E-05 | 5.74  | TC07003321. chr7  | + | 37723379  | 37875470  | 127 | GPR141 RefSeq        |
| TC01004114.hg.1 | -1.3 | 6.15  | -4.01 | 9.88E-05 | 2.11E-03 | 1.1   | TC01004114. chr1  | + | 696291    | 697369    | 30  | Rinn                 |
| TC08000490.hg.1 | -1.3 | 4.68  | -4.96 | 2.03E-06 | 1.68E-04 | 4.7   | TC08000490. chr8  | + | 74991772  | 74991878  | 30  | RNU6-1197P ENSEMBL   |
| TC08001979.hg.1 | -1.3 | 5.85  | -4.33 | 2.83E-05 | 8.67E-04 | 2.25  | TC08001979. chr8  | + | 74964575  | 75012088  | 30  | NONCODE              |
| TC06002121.hg.1 | -1.3 | 11.14 | -5.09 | 1.18E-06 | 1.22E-04 | 5.21  | TC06002121. chr6  | - | 133065009 | 133084598 | 180 | VNN2 RefSeq          |
| TC01004796.hg.1 | -1.3 | 8.68  | -3.93 | 1.32E-04 | 2.61E-03 | 0.84  | TC01004796. chr1  | + | 161496264 | 161497073 | 30  | RP11-77M5.1 NONCODE  |
| TC08001265.hg.1 | -1.3 | 5.23  | -4.63 | 8.45E-06 | 3.86E-04 | 3.37  | TC08001265. chr8  | - | 62544239  | 62544571  | 30  | RN7SKP97 ENSEMBL     |
| TC04000607.hg.1 | -1.3 | 10.85 | -4.9  | 2.67E-06 | 1.97E-04 | 4.44  | TC04000607. chr4  | + | 119555288 | 119555319 | 8   | GenBank              |
| TC08002047.hg.1 | -1.3 | 6.32  | -4.37 | 2.41E-05 | 7.76E-04 | 2.4   | TC08002047. chr8  | + | 103268620 | 103270049 | 30  | NONCODE              |
| TC21000717.hg.1 | -1.3 | 10.9  | -3.31 | 1.21E-03 | 1.36E-02 | -1.18 | TC21000717. chr21 | + | 39601885  | 39663669  | 30  | KCNJ15 NONCODE       |
| TC19000676.hg.1 | -1.3 | 9.47  | -5.2  | 7.16E-07 | 9.32E-05 | 5.67  | TC19000676. chr19 | + | 47813075  | 47825327  | 42  | CSAR1 RefSeq         |
| TC12002828.hg.1 | -1.3 | 7.35  | -5.52 | 1.68E-07 | 4.07E-05 | 7.03  | TC12002828. chr12 | - | 32111689  | 32112260  | 30  | Rinn                 |
| TC06003855.hg.1 | -1.3 | 11.73 | -4.84 | 3.38E-06 | 2.27E-04 | 4.23  | TC06003855. chr6  | - | 133065009 | 133079033 | 80  | VNN2 NONCODE         |
| TC18000318.hg.1 | -1.3 | 9.35  | -5.13 | 9.49E-07 | 1.10E-04 | 5.41  | TC18000318. chr18 | - | 9546789   | 9614600   | 257 | PPP4R1 RefSeq        |
| TC19002489.hg.1 | -1.3 | 8.86  | -5.35 | 3.65E-07 | 6.23E-05 | 6.3   | TC19002489. chr19 | - | 42125344  | 42133428  | 78  | CEACAM4 NONCODE      |
| TC01002054.hg.1 | -1.3 | 10.38 | -4.58 | 1.01E-05 | 4.34E-04 | 3.2   | TC01002054. chr1  | - | 141474    | 149707    | 60  | LOC101928670 ENSEMBL |
| TC08001408.hg.1 | -1.3 | 8.15  | -6.27 | 4.29E-09 | 1.18E-05 | 10.48 | TC08001408. chr8  | - | 92006024  | 92053292  | 150 | TMEM55A RefSeq       |
| TC13000871.hg.1 | -1.2 | 7.91  | -3.72 | 2.88E-04 | 4.61E-03 | 0.12  | TC13000871. chr13 | - | 110406184 | 110438915 | 30  | IRS2 RefSeq          |
| TC01006214.hg.1 | -1.2 | 6.54  | -5.85 | 3.43E-08 | 1.85E-05 | 8.52  | TC01006214. chr1  | - | 235087871 | 235105809 | 183 | Rinn                 |

|                         |      |       |       |          |          |       |                          |   |           |           |     |               |         |
|-------------------------|------|-------|-------|----------|----------|-------|--------------------------|---|-----------|-----------|-----|---------------|---------|
| TC09002906.hg.1         | -1.2 | 6.37  | -4.73 | 5.44E-06 | 2.97E-04 | 3.78  | TC09002906. chr9         | + | 117092069 | 117095536 | 90  | ORM2          | RefSeq  |
| TC0X000007.hg.1         | -1.2 | 7.15  | -4.26 | 3.73E-05 | 1.05E-03 | 2     | TC0X000007. chrX         | + | 1412811   | 1412885   | 30  | MIR3690       | RefSeq  |
| TC0Y000007.hg.1         | -1.2 | 7.15  | -4.26 | 3.73E-05 | 1.05E-03 | 2     | TC0Y000007. chrY         | + | 1362811   | 1362885   | 30  | MIR3690       | RefSeq  |
| TC13001241.hg.1         | -1.2 | 7.99  | -4.48 | 1.55E-05 | 5.77E-04 | 2.81  | TC13001241. chr13        | + | 96444953  | 96445186  | 30  | DIC3          | NONCODE |
| TC01003871.hg.1         | -1.2 | 8.02  | -4.27 | 3.59E-05 | 1.02E-03 | 2.03  | TC01003871. chr1         | - | 223282748 | 223316624 | 150 | TLR5          | RefSeq  |
| TC10002195.hg.1         | -1.2 | 4.41  | -4.3  | 3.27E-05 | 9.58E-04 | 2.12  | TC10002195. chr10        | + | 89739717  | 89740717  | 30  |               | Rinn    |
| TC07001921.hg.1         | -1.2 | 6.43  | -4.51 | 1.36E-05 | 5.27E-04 | 2.93  | TC07001921. chr7         | - | 140075363 | 140075466 | 30  |               | ENSEMBL |
| TC09000565.hg.1         | -1.2 | 8.21  | -5.39 | 2.94E-07 | 5.58E-05 | 6.51  | TC09000565. chr9         | + | 115142189 | 115234690 | 189 | HSDL2         | RefSeq  |
| TC13000228.hg.1         | -1.2 | 5.94  | -3.23 | 1.57E-03 | 1.65E-02 | -1.41 | TC13000228. chr13        | + | 53602830  | 53626196  | 110 | OLFM4         | RefSeq  |
| TC10002048.hg.1         | -1.2 | 6.96  | -4.72 | 5.65E-06 | 3.03E-04 | 3.75  | TC10002048. chr10        | + | 45931684  | 45934607  | 30  |               | NONCODE |
| TC01005185.hg.1         | -1.2 | 10.56 | -4.48 | 1.57E-05 | 5.83E-04 | 2.8   | TC01005185. chr1         | - | 141474    | 149707    | 60  |               | Rinn    |
| TC01001047.hg.1         | -1.2 | 4.85  | -3.19 | 1.77E-03 | 1.81E-02 | -1.52 | TC01001047. chr1         | + | 120906461 | 120906507 | 23  |               | UCSC    |
| TC12001651.hg.1         | -1.2 | 4.63  | -2.73 | 7.09E-03 | 5.17E-02 | -2.75 | TC12001651. chr12        | - | 62511668  | 62511739  | 30  |               | ENSEMBL |
| TC17000813.hg.1         | -1.2 | 8.58  | -4.16 | 5.51E-05 | 1.38E-03 | 1.64  | TC17000813. chr17        | + | 68164814  | 68176183  | 50  | KCNJ2         | RefSeq  |
| TC19000677.hg.1         | -1.2 | 8.71  | -5.91 | 2.54E-08 | 1.54E-05 | 8.81  | TC19000677. chr19        | + | 47835404  | 47845272  | 40  | CSAR2         | RefSeq  |
| TC02002639.hg.1         | -1.2 | 5.55  | -4.31 | 3.14E-05 | 9.30E-04 | 2.16  | TC02002639. chr2         | - | 197079943 | 197080046 | 30  |               | ENSEMBL |
| TC08000487.hg.1         | -1.2 | 6.57  | -4.33 | 2.82E-05 | 8.64E-04 | 2.26  | TC08000487. chr8         | + | 74903564  | 74941322  | 60  | LY96          | RefSeq  |
| TC12002734.hg.1         | -1.2 | 11.43 | -4.92 | 2.48E-06 | 1.87E-04 | 4.51  | TC12002734. chr12        | - | 8074143   | 8078504   | 40  | SLC2A3        | NONCODE |
| TC04001804.hg.1         | -1.2 | 6.82  | -4.76 | 4.85E-06 | 2.80E-04 | 3.89  | TC04001804. chr4         | - | 185286341 | 185291024 | 30  | RP11-290F5.1  | Havana  |
| TC0X000143.hg.1         | -1.2 | 6.76  | -3.07 | 2.60E-03 | 2.44E-02 | -1.86 | TC0X000143. chrX         | + | 30716324  | 30740049  | 30  | RP11-242C19.2 | Havana  |
| TC06003169.hg.1         | -1.2 | 8.72  | -4.53 | 1.26E-05 | 5.03E-04 | 3     | TC06003169. chr6         | + | 160514114 | 160517244 | 30  | LOC729603     | NONCODE |
| TC0X001347.hg.1         | -1.2 | 5.93  | -4.05 | 8.40E-05 | 1.86E-03 | 1.25  | TC0X001347. chrX         | - | 123509753 | 124097666 | 328 | TENM1         | RefSeq  |
| TC04002830.hg.1         | -1.2 | 5.68  | -3.93 | 1.35E-04 | 2.65E-03 | 0.81  | TC04002830. chr4         | - | 174245758 | 174247299 | 30  |               | NONCODE |
| TC10002541.hg.1         | -1.2 | 6.2   | -4.45 | 1.75E-05 | 6.27E-04 | 2.7   | TC10002541. chr10        | - | 31119045  | 31124561  | 40  |               | Rinn    |
| TC17001890.hg.1         | -1.2 | 8.93  | -5.17 | 8.18E-07 | 1.02E-04 | 5.55  | TC17001890. chr17        | - | 73937589  | 73975515  | 231 | ACOX1         | RefSeq  |
| TC17000965.hg.1         | -1.2 | 9.49  | -4.64 | 8.12E-06 | 3.77E-04 | 3.41  | TC17000965. chr17        | - | 289769    | 295731    | 30  | FAM101B       | RefSeq  |
| TC16000519.hg.1         | -1.2 | 7.6   | -5.91 | 2.55E-08 | 1.54E-05 | 8.8   | TC16000519. chr16        | + | 66613351  | 66622178  | 40  | CMTM2         | RefSeq  |
| TC17002426.hg.1         | -1.2 | 8.47  | -3.94 | 1.31E-04 | 2.59E-03 | 0.84  | TC17002426. chr17        | - | 289773    | 292354    | 36  | FAM101B       | NONCODE |
| TC19002306.hg.1         | -1.2 | 8.13  | -6.23 | 5.47E-09 | 1.19E-05 | 10.25 | TC19002306. chr19        | - | 6661264   | 6663469   | 26  | TNFSF14       | NONCODE |
| TC06000523.hg.1         | -1.2 | 9.07  | -4.97 | 1.93E-06 | 1.62E-04 | 4.75  | TC06000523. chr6         | + | 35995454  | 36079013  | 269 | MAPK14        | RefSeq  |
| TC01001581.hg.1         | -1.2 | 8.66  | -5.88 | 2.93E-08 | 1.71E-05 | 8.67  | TC01001581. chr1         | + | 182758428 | 182799519 | 306 | NPL           | RefSeq  |
| TC08001855.hg.1         | -1.2 | 5.61  | -5.58 | 1.21E-07 | 3.40E-05 | 7.34  | TC08001855. chr8         | + | 28621266  | 28622725  | 30  |               | Rinn    |
| TC01001881.hg.1         | -1.2 | 11.35 | -4.95 | 2.17E-06 | 1.74E-04 | 4.64  | TC01001881. chr1         | + | 228160065 | 228160098 | 10  |               | GenBank |
| TC01003854.hg.1         | -1.2 | 11.35 | -4.95 | 2.17E-06 | 1.74E-04 | 4.64  | TC01003854. chr1         | - | 222646010 | 222646043 | 10  |               | GenBank |
| TC6_apd_hap1000078.hg.1 | -1.2 | 9.23  | -4.9  | 2.67E-06 | 1.97E-04 | 4.44  | TC6_apd_hap1000078. chr6 | - | 2007128   | 2009922   | 35  | FLOT1         | RefSeq  |
| TC05000981.hg.1         | -1.2 | 9.27  | -4.79 | 4.24E-06 | 2.60E-04 | 4.01  | TC05000981. chr5         | + | 175085033 | 175113245 | 50  | HRH2          | RefSeq  |
| TC09002219.hg.1         | -1.2 | 9.8   | -4.18 | 5.26E-05 | 1.34E-03 | 1.68  | TC09002219. chr9         | + | 120466460 | 120479766 | 40  |               | NONCODE |
| TC07001534.hg.1         | -1.2 | 7.95  | -3.37 | 9.86E-04 | 1.17E-02 | -1    | TC07001534. chr7         | - | 75162619  | 75368283  | 389 | HIP1          | RefSeq  |
| TC0Y000089.hg.1         | -1.2 | 11.45 | -5    | 1.71E-06 | 1.51E-04 | 4.86  | TC0Y000089. chrY         | + | 26422647  | 26422679  | 9   |               | GenBank |
| TC0Y000215.hg.1         | -1.2 | 11.45 | -5    | 1.71E-06 | 1.51E-04 | 4.86  | TC0Y000215. chrY         | - | 27539763  | 27539795  | 9   |               | GenBank |
| TC09002578.hg.1         | -1.2 | 7.82  | -3.77 | 2.37E-04 | 4.03E-03 | 0.3   | TC09002578. chr9         | - | 71158457  | 71161505  | 47  |               | Rinn    |
| TC10001313.hg.1         | -1.2 | 4.67  | -3.52 | 5.95E-04 | 7.94E-03 | -0.54 | TC10001313. chr10        | - | 59998418  | 59998521  | 30  |               | ENSEMBL |
| TC12001269.hg.1         | -1.2 | 10.46 | -5.2  | 7.13E-07 | 9.30E-05 | 5.68  | TC12001269. chr12        | - | 14656595  | 14721283  | 140 | PLBD1         | RefSeq  |
| TC01003624.hg.1         | -1.2 | 10.33 | -4.6  | 9.47E-06 | 4.17E-04 | 3.27  | TC01003624. chr1         | - | 184759858 | 184943682 | 279 | FAM129A       | RefSeq  |
| TC11002345.hg.1         | -1.2 | 8.66  | -5.1  | 1.11E-06 | 1.18E-04 | 5.26  | TC11002345. chr11        | - | 118097409 | 118123065 | 120 | MP2L3         | RefSeq  |
| TC01002163.hg.1         | -1.2 | 6.32  | -5.46 | 2.15E-07 | 4.63E-05 | 6.8   | TC01002163. chr1         | - | 7975931   | 8003225   | 155 | TNFRSF9       | RefSeq  |
| TC14001115.hg.1         | -1.2 | 7.02  | -5.2  | 7.13E-07 | 9.30E-05 | 5.68  | TC14001115. chr14        | - | 50575350  | 50583318  | 90  | VCPKMT        | RefSeq  |
| TC01003209.hg.1         | -1.2 | 5.47  | -4.42 | 2.00E-05 | 6.85E-04 | 2.57  | TC01003209. chr1         | - | 150670535 | 150693364 | 224 | HORMAD1       | RefSeq  |

|                 |      |       |       |          |          |       |                   |   |           |           |     |               |         |
|-----------------|------|-------|-------|----------|----------|-------|-------------------|---|-----------|-----------|-----|---------------|---------|
| TC15000949.hg.1 | -1.2 | 8.96  | -5.11 | 1.07E-06 | 1.16E-04 | 5.3   | TC15000949. chr15 | + | 99192200  | 99507759  | 270 | IGF1R         | RefSeq  |
| TC03003384.hg.1 | -1.2 | 7.29  | -5.47 | 2.05E-07 | 4.49E-05 | 6.84  | TC03003384. chr3  | - | 49306030  | 49314508  | 110 | C3orf62       | RefSeq  |
| TC01001676.hg.1 | -1.2 | 6.07  | -5.06 | 1.32E-06 | 1.29E-04 | 5.1   | TC01001676. chr1  | + | 202573396 | 202574421 | 30  | RP11-569A11.1 | Havana  |
| TC11002690.hg.1 | -1.2 | 3.64  | -4.63 | 8.47E-06 | 3.87E-04 | 3.37  | TC11002690. chr11 | + | 59661570  | 59663119  | 30  |               | Rinn    |
| TC12002079.hg.1 | -1.2 | 8.7   | -4.16 | 5.57E-05 | 1.39E-03 | 1.63  | TC12002079. chr12 | - | 123199303 | 123201439 | 30  | HCAR3         | RefSeq  |
| TC14000431.hg.1 | -1.2 | 7.36  | -3.32 | 1.14E-03 | 1.31E-02 | -1.13 | TC14000431. chr14 | + | 71865054  | 71865124  | 30  | SNORD56B      | RefSeq  |
| TC06001714.hg.1 | -1.2 | 9.33  | -5.08 | 1.20E-06 | 1.23E-04 | 5.19  | TC06001714. chr6  | - | 41157552  | 41168932  | 70  | TREML2        | RefSeq  |
| TC11003242.hg.1 | -1.2 | 7.79  | -4.62 | 8.61E-06 | 3.91E-04 | 3.35  | TC11003242. chr11 | - | 72514717  | 72524260  | 30  |               | Rinn    |
| TC15001546.hg.1 | -1.2 | 7.77  | -5.55 | 1.43E-07 | 3.74E-05 | 7.18  | TC15001546. chr15 | - | 64199235  | 64338635  | 203 | DAPK2         | RefSeq  |
| TC01004893.hg.1 | -1.2 | 6.18  | -5.24 | 5.83E-07 | 8.38E-05 | 5.86  | TC01004893. chr1  | + | 185339834 | 185344123 | 30  |               | Rinn    |
| TC02004639.hg.1 | -1.2 | 3.74  | -2.96 | 3.67E-03 | 3.16E-02 | -2.17 | TC02004639. chr2  | - | 152236008 | 152236378 | 22  | TNFAIP6       | NONCODE |
| TC06000119.hg.1 | -1.2 | 8.03  | -3.7  | 3.14E-04 | 4.94E-03 | 0.04  | TC06000119. chr6  | + | 18367060  | 18367085  | 2   |               | GenBank |
| TC05000604.hg.1 | -1.2 | 8.13  | -4.39 | 2.22E-05 | 7.37E-04 | 2.47  | TC05000604. chr5  | + | 126112315 | 126172712 | 267 | LMNB1         | RefSeq  |
| TC05003141.hg.1 | -1.2 | 9.01  | -4.21 | 4.52E-05 | 1.21E-03 | 1.82  | TC05003141. chr5  | - | 90597138  | 90610346  | 293 |               | NONCODE |
| TC09001215.hg.1 | -1.2 | 7.09  | -4.68 | 6.76E-06 | 3.38E-04 | 3.58  | TC09001215. chr9  | - | 77337411  | 77503010  | 518 | TRPM6         | RefSeq  |
| TC01006237.hg.1 | -1.2 | 8.33  | -4.69 | 6.63E-06 | 3.35E-04 | 3.6   | TC01006237. chr1  | - | 243192814 | 243215554 | 72  |               | Broad   |
| TC09000601.hg.1 | -1.2 | 9.5   | -4.31 | 3.05E-05 | 9.13E-04 | 2.18  | TC09000601. chr9  | + | 120466453 | 120479769 | 120 | TLR4          | RefSeq  |
| TC17000118.hg.1 | -1.2 | 8.05  | -5.51 | 1.68E-07 | 4.07E-05 | 7.03  | TC17000118. chr17 | + | 7758384   | 7759417   | 30  | TMEM88        | RefSeq  |
| TC17001474.hg.1 | -1.2 | 7.59  | -5.05 | 1.37E-06 | 1.33E-04 | 5.06  | TC17001474. chr17 | - | 39078948  | 39093836  | 176 | KRT23         | RefSeq  |
| TC03000911.hg.1 | -1.2 | 5.85  | -3.82 | 2.04E-04 | 3.61E-03 | 0.44  | TC03000911. chr3  | + | 169775089 | 169775217 | 30  | RNU4-38P      | ENSEMBL |
| TC09001187.hg.1 | -1.2 | 7.8   | -3.74 | 2.72E-04 | 4.43E-03 | 0.17  | TC09001187. chr9  | - | 71158457  | 71161505  | 47  | LOC101927015  | ENSEMBL |
| TC04000581.hg.1 | -1.2 | 8.23  | -4.29 | 3.33E-05 | 9.71E-04 | 2.1   | TC04000581. chr4  | + | 113206665 | 113363776 | 452 | ALPK1         | RefSeq  |
| TC02001723.hg.1 | -1.2 | 7.52  | -4.51 | 1.40E-05 | 5.39E-04 | 2.9   | TC02001723. chr2  | - | 32449518  | 32490923  | 118 | NLR4          | RefSeq  |
| TC05000982.hg.1 | -1.2 | 5.97  | -4.63 | 8.26E-06 | 3.80E-04 | 3.39  | TC05000982. chr5  | + | 175108464 | 175111558 | 30  | HRH2          | RefSeq  |
| TC01005700.hg.1 | -1.2 | 7.15  | -5.15 | 8.95E-07 | 1.07E-04 | 5.46  | TC01005700. chr1  | - | 111390708 | 111391552 | 30  |               | Broad   |
| TC12001826.hg.1 | -1.2 | 8.23  | -5.52 | 1.60E-07 | 4.01E-05 | 7.07  | TC12001826. chr12 | - | 94960900  | 95044338  | 110 | TMCC3         | RefSeq  |
| TC08000489.hg.1 | -1.2 | 6.03  | -4.59 | 9.73E-06 | 4.24E-04 | 3.24  | TC08000489. chr8  | + | 74964575  | 75012088  | 30  | RP11-612.3    | Havana  |
| TC07003291.hg.1 | -1.2 | 7.96  | -5.45 | 2.27E-07 | 4.75E-05 | 6.75  | TC07003291. chr7  | + | 112063023 | 112117258 | 447 | IFRD1         | RefSeq  |
| TC18000987.hg.1 | -1.2 | 8.17  | -6.93 | 1.49E-10 | 3.36E-06 | 13.64 | TC18000987. chr18 | - | 74072230  | 74207146  | 110 | ZNF516        | NONCODE |
| TC10001145.hg.1 | -1.2 | 9.18  | -4.46 | 1.70E-05 | 6.15E-04 | 2.72  | TC10001145. chr10 | - | 29833933  | 29834026  | 30  | MIR604        | RefSeq  |
| TC14000941.hg.1 | -1.2 | 7.66  | -4.73 | 5.61E-06 | 3.02E-04 | 3.75  | TC14000941. chr14 | - | 23415437  | 23451467  | 132 | HAUS4         | RefSeq  |
| TC04000827.hg.1 | -1.2 | 6.8   | -3.72 | 2.91E-04 | 4.65E-03 | 0.11  | TC04000827. chr4  | + | 166173732 | 166173813 | 30  | RNU4-87P      | ENSEMBL |
| TC06001299.hg.1 | -1.2 | 4.74  | -4.85 | 3.30E-06 | 2.24E-04 | 4.25  | TC06001299. chr6  | - | 17878685  | 17882609  | 30  |               | ENSEMBL |
| TC10001312.hg.1 | -1.2 | 8.78  | -4.89 | 2.74E-06 | 1.99E-04 | 4.42  | TC10001312. chr10 | - | 59951278  | 60027694  | 70  | IPMK          | RefSeq  |
| TC19001784.hg.1 | -1.2 | 9.55  | -4.3  | 3.28E-05 | 9.59E-04 | 2.11  | TC19001784. chr19 | - | 52114781  | 52150151  | 220 | SIGLEC14      | RefSeq  |
| TC03003104.hg.1 | -1.2 | 6.38  | -3.61 | 4.27E-04 | 6.25E-03 | -0.24 | TC03003104. chr3  | - | 134294594 | 134299804 | 30  |               | Rinn    |
| TC01003987.hg.1 | -1.2 | 6.15  | -6.14 | 8.24E-09 | 1.26E-05 | 9.86  | TC01003987. chr1  | - | 235093089 | 235105809 | 130 | RP11-443B7.1  | Havana  |
| TC01001400.hg.1 | -1.2 | 10.04 | -3.81 | 2.12E-04 | 3.71E-03 | 0.4   | TC01001400. chr1  | + | 161492935 | 161493006 | 30  |               | UCSC    |
| TC10000550.hg.1 | -1.2 | 8.46  | -3.73 | 2.75E-04 | 4.47E-03 | 0.16  | TC10000550. chr10 | + | 79541135  | 79541163  | 5   |               | GenBank |
| TC04000710.hg.1 | -1.2 | 10.19 | -6.01 | 1.58E-08 | 1.43E-05 | 9.25  | TC04000710. chr4  | + | 146296695 | 146297405 | 30  | RTN3P1        | ENSEMBL |
| TC06002456.hg.1 | -1.2 | 6.52  | -5.46 | 2.21E-07 | 4.70E-05 | 6.77  | TC06002456. chr6  | + | 2993299   | 3023034   | 494 | MSH5-SAPCD1   | NONCODE |
| TC10000259.hg.1 | -1.2 | 7.88  | -5.05 | 1.36E-06 | 1.32E-04 | 5.07  | TC10000259. chr10 | + | 38742109  | 38755311  | 30  | RP11-291L22.4 | Havana  |
| TC07000401.hg.1 | -1.2 | 7.69  | -4.23 | 4.23E-05 | 1.15E-03 | 1.88  | TC07000401. chr7  | + | 65279659  | 65279762  | 30  | RNU6-912P     | ENSEMBL |
| TC12002417.hg.1 | -1.2 | 5.77  | -4.53 | 1.26E-05 | 5.04E-04 | 3     | TC12002417. chr12 | + | 65103238  | 65104293  | 30  |               | NONCODE |
| TC0Y000275.hg.1 | -1.2 | 7.95  | -4.38 | 2.36E-05 | 7.67E-04 | 2.42  | TC0Y000275. chrY  | + | 25537324  | 25538842  | 30  |               | Broad   |
| TC16001565.hg.1 | -1.2 | 8.19  | -2.86 | 4.89E-03 | 3.90E-02 | -2.43 | TC16001565. chr16 | + | 53412402  | 53423133  | 30  |               | Rinn    |
| TC05002740.hg.1 | -1.2 | 6.86  | -3.63 | 4.05E-04 | 6.00E-03 | -0.19 | TC05002740. chr5  | + | 172354584 | 172356104 | 30  |               | NONCODE |
| TC06001298.hg.1 | -1.2 | 7.97  | -6.07 | 1.20E-08 | 1.43E-05 | 9.51  | TC06001298. chr6  | - | 17759414  | 17987854  | 562 | KIF13A        | RefSeq  |



|                 |      |       |       |          |          |       |                   |   |           |           |     |                      |
|-----------------|------|-------|-------|----------|----------|-------|-------------------|---|-----------|-----------|-----|----------------------|
| TC04002143.hg.1 | -1.2 | 8.24  | -3.55 | 5.23E-04 | 7.19E-03 | -0.42 | TC04002143. chr4  | + | 113242860 | 113243823 | 30  | NONCODE              |
| TC19001500.hg.1 | -1.2 | 9.78  | -6.29 | 3.98E-09 | 1.17E-05 | 10.55 | TC19001500. chr19 | - | 38899698  | 38916945  | 240 | RASGRP4 RefSeq       |
| TC08002552.hg.1 | -1.2 | 7.54  | -4.63 | 8.32E-04 | 3.82E-04 | 3.39  | TC08002552. chr8  | - | 142208034 | 142209262 | 18  | Rinn                 |
| TC10002529.hg.1 | -1.2 | 7.24  | -3.81 | 2.05E-04 | 3.62E-03 | 0.43  | TC10002529. chr10 | - | 29835750  | 29837842  | 30  | NONCODE              |
| TC19001787.hg.1 | -1.2 | 9.66  | -5.15 | 8.84E-07 | 1.06E-04 | 5.48  | TC19001787. chr19 | - | 52249023  | 52255150  | 40  | FPR1 RefSeq          |
| TC12001178.hg.1 | -1.2 | 10.02 | -3.28 | 1.30E-03 | 1.44E-02 | -1.24 | TC12001178. chr12 | - | 8685901   | 8693559   | 90  | CLEC4E RefSeq        |
| TC11000499.hg.1 | -1.2 | 9.57  | -5.55 | 1.41E-07 | 3.73E-05 | 7.2   | TC11000499. chr11 | + | 59480929  | 59573355  | 220 | STX3 RefSeq          |
| TC10002543.hg.1 | -1.2 | 6.89  | -3.24 | 1.52E-03 | 1.61E-02 | -1.38 | TC10002543. chr10 | - | 31215453  | 31215972  | 21  | NONCODE              |
| TC17002572.hg.1 | -1.2 | 8.6   | -4.18 | 5.20E-05 | 1.33E-03 | 1.69  | TC17002572. chr17 | - | 27971812  | 27972377  | 30  | NONCODE              |
| TC17002303.hg.1 | -1.2 | 4.51  | -3.2  | 1.68E-03 | 1.74E-02 | -1.48 | TC17002303. chr17 | + | 57862174  | 57862396  | 30  | NONCODE              |
| TC10000692.hg.1 | -1.2 | 8.04  | -5.01 | 1.61E-06 | 1.45E-04 | 4.91  | TC10000692. chr10 | + | 99079022  | 99081672  | 60  | FRAT1 RefSeq         |
| TC05001589.hg.1 | -1.2 | 9.56  | -4.15 | 5.86E-05 | 1.44E-03 | 1.58  | TC05001589. chr5  | - | 90598846  | 90610219  | 80  | LUCAT1 ENSEMBL       |
| TC02003766.hg.1 | -1.2 | 6.77  | -5.14 | 9.06E-07 | 1.08E-04 | 5.45  | TC02003766. chr2  | + | 202038291 | 202043285 | 30  | Rinn                 |
| TC09000314.hg.1 | -1.2 | 5.44  | -3.44 | 7.71E-04 | 9.70E-03 | -0.77 | TC09000314. chr9  | + | 71150806  | 71154670  | 30  | TMEM252 GenBank      |
| TC20001381.hg.1 | -1.2 | 7.22  | -5.13 | 9.67E-07 | 1.10E-04 | 5.39  | TC20001381. chr20 | - | 1754011   | 1760392   | 40  | LOC100289473 NONCODE |
| TC15002310.hg.1 | -1.2 | 5.74  | -3.93 | 1.35E-04 | 2.65E-03 | 0.82  | TC15002310. chr15 | + | 80253413  | 80263461  | 30  | BCL2A1 NONCODE       |
| TC02003443.hg.1 | -1.2 | 6.89  | -3.69 | 3.18E-04 | 4.99E-03 | 0.03  | TC02003443. chr2  | + | 102578518 | 102603782 | 107 | Broad                |
| TC12003306.hg.1 | -1.2 | 4.38  | -4.46 | 1.67E-05 | 6.10E-04 | 2.74  | TC12003306. chr12 | + | 96883353  | 96948585  | 170 | C12orf55 GenBank     |
| TC12002526.hg.1 | -1.2 | 4.54  | -4.55 | 1.19E-05 | 4.84E-04 | 3.06  | TC12002526. chr12 | + | 96883385  | 96934745  | 140 | C12orf55 NONCODE     |
| TC01004314.hg.1 | -1.2 | 8.12  | -4.88 | 2.85E-06 | 2.03E-04 | 4.38  | TC01004314. chr1  | + | 36321683  | 36323276  | 30  | NONCODE              |
| TC02004277.hg.1 | -1.2 | 4.66  | -4.14 | 6.13E-05 | 1.48E-03 | 1.54  | TC02004277. chr2  | - | 64313484  | 64315380  | 30  | Rinn                 |
| TC19001559.hg.1 | -1.2 | 8.66  | -5.39 | 2.99E-07 | 5.62E-05 | 6.49  | TC19001559. chr19 | - | 42125344  | 42133442  | 108 | CEACAM4 RefSeq       |
| TC22000270.hg.1 | -1.2 | 10.1  | -5.95 | 2.08E-08 | 1.43E-05 | 8.99  | TC22000270. chr22 | + | 37257030  | 37274059  | 140 | NCF4 RefSeq          |
| TC10001725.hg.1 | -1.2 | 9.4   | -5.48 | 1.95E-07 | 4.41E-05 | 6.89  | TC10001725. chr10 | - | 125767182 | 125853206 | 248 | CHST15 RefSeq        |
| TC13000336.hg.1 | -1.2 | 8.56  | -5.33 | 3.89E-07 | 6.44E-05 | 6.24  | TC13000336. chr13 | + | 96329393  | 96447243  | 140 | DJC3 RefSeq          |
| TC01001014.hg.1 | -1.2 | 7.8   | -4.72 | 5.80E-06 | 3.07E-04 | 3.72  | TC01001014. chr1  | + | 116519119 | 116612675 | 189 | SLC22A15 RefSeq      |
| TC20001463.hg.1 | -1.2 | 8.06  | -5.26 | 5.35E-07 | 8.01E-05 | 5.94  | TC20001463. chr20 | - | 20370273  | 20372205  | 30  | NONCODE              |
| TC04002523.hg.1 | -1.2 | 9.88  | -5.21 | 6.75E-07 | 9.09E-05 | 5.73  | TC04002523. chr4  | - | 40434720  | 40631861  | 60  | RBM47 NONCODE        |
| TC10000293.hg.1 | -1.2 | 10.48 | -5.34 | 3.82E-07 | 6.38E-05 | 6.26  | TC10000293. chr10 | + | 45869624  | 45941567  | 240 | ALOX5 RefSeq         |
| TC10001946.hg.1 | -1.2 | 7.69  | -4.57 | 1.07E-05 | 4.52E-04 | 3.15  | TC10001946. chr10 | + | 26823287  | 26824417  | 30  | NONCODE              |
| TC05001588.hg.1 | -1.2 | 8.39  | -4.32 | 3.00E-05 | 9.00E-04 | 2.2   | TC05001588. chr5  | - | 90575914  | 90576959  | 30  | LOC729040 ENSEMBL    |
| TC13001676.hg.1 | -1.2 | 4.59  | -2.94 | 3.87E-03 | 3.29E-02 | -2.22 | TC13001676. chr13 | - | 109864391 | 109869109 | 30  | NONCODE              |
| TC0X001567.hg.1 | -1.2 | 9.87  | -5.09 | 1.13E-06 | 1.20E-04 | 5.24  | TC0X001567. chrX  | + | 1387693   | 1428828   | 116 | NONCODE              |
| TC14001287.hg.1 | -1.2 | 7.6   | -4.72 | 5.81E-06 | 3.07E-04 | 3.72  | TC14001287. chr14 | - | 73738890  | 73740789  | 30  | ENSEMBL              |
| TC15000796.hg.1 | -1.2 | 8.27  | -6.13 | 8.71E-09 | 1.26E-05 | 9.81  | TC15000796. chr15 | + | 83776159  | 83806111  | 120 | TM6SF1 RefSeq        |
| TC01000129.hg.1 | -1.2 | 10.02 | -5.73 | 5.97E-08 | 2.29E-05 | 8     | TC01000129. chr1  | + | 10458649  | 10480233  | 251 | PGD RefSeq           |
| TC08000402.hg.1 | -1.2 | 8.61  | -5.28 | 4.84E-07 | 7.50E-05 | 6.04  | TC08000402. chr8  | + | 59323823  | 59364060  | 140 | UBXN2B RefSeq        |
| TC06003248.hg.1 | -1.2 | 8.76  | -4.81 | 3.97E-06 | 2.50E-04 | 4.07  | TC06003248. chr6  | - | 130803    | 148170    | 100 | NONCODE              |
| TC11000575.hg.1 | -1.2 | 9.77  | -6    | 1.63E-08 | 1.43E-05 | 9.22  | TC11000575. chr11 | + | 63448918  | 63527363  | 140 | RTN3 RefSeq          |
| TC08002046.hg.1 | -1.2 | 6.21  | -3.83 | 1.92E-04 | 3.46E-03 | 0.49  | TC08002046. chr8  | + | 103255837 | 103265561 | 30  | KB-431C1.4 NONCODE   |
| TC10001146.hg.1 | -1.2 | 5.53  | -4.29 | 3.35E-05 | 9.74E-04 | 2.09  | TC10001146. chr10 | - | 29891193  | 29891275  | 30  | MIR938 RefSeq        |
| TC06001204.hg.1 | -1.2 | 8.11  | -4.15 | 5.90E-05 | 1.44E-03 | 1.57  | TC06001204. chr6  | + | 171044839 | 171045633 | 30  | XX-C2158C6.1 Havana  |
| TC01003553.hg.1 | -1.2 | 7.29  | -4.37 | 2.39E-05 | 7.72E-04 | 2.41  | TC01003553. chr1  | - | 175986413 | 175987896 | 30  | RP11-492I21.1 Havana |
| TC01006200.hg.1 | -1.2 | 6.31  | -4.75 | 5.03E-06 | 2.85E-04 | 3.85  | TC01006200. chr1  | - | 232730260 | 232734148 | 40  | RP5-855F14.1 NONCODE |
| TC01003187.hg.1 | -1.2 | 6.77  | -4.14 | 6.07E-05 | 1.47E-03 | 1.55  | TC01003187. chr1  | - | 149754245 | 149783928 | 132 | HIST2H2BF RefSeq     |
| TC19002719.hg.1 | -1.2 | 8.32  | -5.82 | 3.95E-08 | 1.96E-05 | 8.39  | TC19002719. chr19 | - | 54818353  | 54824409  | 160 | LILRA5 RefSeq        |
| TC04002876.hg.1 | -1.2 | 7.17  | -4.38 | 2.31E-05 | 7.57E-04 | 2.44  | TC04002876. chr4  | - | 185286341 | 185303530 | 190 | NONCODE              |
| TC02004700.hg.1 | -1.2 | 8.16  | -3.56 | 5.18E-04 | 7.14E-03 | -0.41 | TC02004700. chr2  | - | 175410028 | 175411063 | 30  | NONCODE              |

|                 |      |       |       |          |          |       |                   |   |           |           |     |                      |
|-----------------|------|-------|-------|----------|----------|-------|-------------------|---|-----------|-----------|-----|----------------------|
| TC16001726.hg.1 | -1.2 | 11.32 | -4.09 | 7.42E-05 | 1.70E-03 | 1.36  | TC16001726. chr16 | + | 90234331  | 90235598  | 27  | NONCODE              |
| TC04000460.hg.1 | -1.2 | 7.54  | -5.78 | 4.72E-04 | 2.13E-05 | 8.22  | TC04000460. chr4  | + | 84457067  | 84527028  | 230 | AGPAT9 RefSeq        |
| TC06003341.hg.1 | -1.2 | 5.95  | -3.66 | 3.55E-04 | 5.43E-03 | -0.07 | TC06003341. chr6  | - | 2835534   | 2835745   | 30  | NONCODE              |
| TC01004099.hg.1 | -1.2 | 6.63  | -4.08 | 7.58E-05 | 1.73E-03 | 1.34  | TC01004099. chr1  | + | 150309    | 151388    | 30  | RP11-34P13.9 NONCODE |
| TC11001678.hg.1 | -1.2 | 3.27  | -3.41 | 8.51E-04 | 1.04E-02 | -0.86 | TC11001678. chr11 | - | 45734965  | 45734994  | 6   | GenBank              |
| TC01000127.hg.1 | -1.2 | 7.59  | -4.93 | 2.31E-06 | 1.78E-04 | 4.58  | TC01000127. chr1  | + | 10270764  | 10441661  | 680 | KIF1B RefSeq         |
| TC01001624.hg.1 | -1.2 | 11.16 | -5.01 | 1.64E-06 | 1.47E-04 | 4.9   | TC01001624. chr1  | + | 192778169 | 192781407 | 110 | RGS2 RefSeq          |
| TC06002785.hg.1 | -1.2 | 8.47  | -5.22 | 6.33E-07 | 8.78E-05 | 5.79  | TC06002785. chr6  | + | 41217115  | 41217327  | 30  | TREML5P NONCODE      |
| TC01005397.hg.1 | -1.2 | 8.78  | -4.25 | 3.97E-05 | 1.10E-03 | 1.94  | TC01005397. chr1  | - | 33789228  | 33789621  | 30  | NONCODE              |
| TC14000434.hg.1 | -1.2 | 7.31  | -3.72 | 2.94E-04 | 4.69E-03 | 0.1   | TC14000434. chr14 | + | 71954578  | 71956420  | 30  | LOC145474 RefSeq     |
| TC17000349.hg.1 | -1.2 | 9.8   | -4.74 | 5.23E-06 | 2.92E-04 | 3.82  | TC17000349. chr17 | + | 28705942  | 28796730  | 276 | CPD RefSeq           |
| TC08002531.hg.1 | -1.2 | 7.11  | -4.45 | 1.78E-05 | 6.36E-04 | 2.68  | TC08002531. chr8  | - | 131307601 | 131308779 | 30  | NONCODE              |
| TC01002763.hg.1 | -1.2 | 7.62  | -2.92 | 4.11E-03 | 3.44E-02 | -2.27 | TC01002763. chr1  | - | 68564142  | 68698420  | 276 | WLS RefSeq           |
| TC06001152.hg.1 | -1.2 | 10.66 | -5.19 | 7.57E-07 | 9.63E-05 | 5.62  | TC06001152. chr6  | + | 160390131 | 160534539 | 579 | IGF2R RefSeq         |
| TC12000195.hg.1 | -1.2 | 6.02  | -6.14 | 8.33E-09 | 1.26E-05 | 9.85  | TC12000195. chr12 | + | 14720684  | 14772689  | 65  | LOC101928290 ENSEMBL |
| TC04002168.hg.1 | -1.2 | 8.66  | -5.08 | 1.20E-06 | 1.23E-04 | 5.19  | TC04002168. chr4  | + | 120299287 | 120326770 | 30  | Broad                |
| TC03000231.hg.1 | -1.2 | 8.63  | -4.5  | 1.46E-05 | 5.54E-04 | 2.87  | TC03000231. chr3  | + | 43731605  | 43775863  | 217 | ABHD5 RefSeq         |
| TC13000870.hg.1 | -1.2 | 4.18  | -3.59 | 4.65E-04 | 6.61E-03 | -0.32 | TC13000870. chr13 | - | 109816250 | 109853831 | 35  | MYO16-AS1 ENSEMBL    |
| TC11000813.hg.1 | -1.2 | 6.8   | -5.39 | 2.93E-07 | 5.58E-05 | 6.51  | TC11000813. chr11 | + | 75486949  | 75487974  | 30  | ENSEMBL              |
| TC05000101.hg.1 | -1.2 | 6.04  | -3.62 | 4.12E-04 | 6.08E-03 | -0.21 | TC05000101. chr5  | + | 17444119  | 17484055  | 40  | RP11-321E2.4 Havana  |
| TC20000582.hg.1 | -1.2 | 9.69  | -5.37 | 3.34E-07 | 5.89E-05 | 6.39  | TC20000582. chr20 | - | 3912068   | 3996229   | 110 | RNF24 RefSeq         |
| TC06003684.hg.1 | -1.2 | 4.63  | -3.54 | 5.42E-04 | 7.38E-03 | -0.45 | TC06003684. chr6  | - | 53095403  | 53096831  | 30  | Rinn                 |
| TC19002395.hg.1 | -1.2 | 4.78  | -3.01 | 3.07E-03 | 2.77E-02 | -2.01 | TC19002395. chr19 | - | 21763358  | 21765406  | 30  | NONCODE              |
| TC17001311.hg.1 | -1.2 | 9.12  | -4.94 | 2.24E-06 | 1.76E-04 | 4.61  | TC17001311. chr17 | - | 27206353  | 27224715  | 160 | FLOT2 RefSeq         |
| TC02000618.hg.1 | -1.2 | 7.14  | -3.59 | 4.57E-04 | 6.54E-03 | -0.3  | TC02000618. chr2  | + | 102578518 | 102603629 | 30  | NONCODE              |
| TC10002018.hg.1 | -1.2 | 8.17  | -4.96 | 2.08E-06 | 1.71E-04 | 4.68  | TC10002018. chr10 | + | 38742109  | 38764837  | 60  | Broad                |
| TC20000402.hg.1 | -1.2 | 7.63  | -3.98 | 1.11E-04 | 2.30E-03 | 0.99  | TC20000402. chr20 | + | 48909257  | 48931459  | 70  | LINC01270 RefSeq     |
| TC20000598.hg.1 | -1.2 | 6.88  | -5.06 | 1.30E-06 | 1.29E-04 | 5.12  | TC20000598. chr20 | - | 5488521   | 5490648   | 30  | LOC101929207 ENSEMBL |
| TC02001769.hg.1 | -1.2 | 7.37  | -4.63 | 8.44E-06 | 3.86E-04 | 3.37  | TC02001769. chr2  | - | 40339286  | 40838193  | 249 | SLC8A1 RefSeq        |
| TC10002447.hg.1 | -1.2 | 5.56  | -4.76 | 4.76E-06 | 2.77E-04 | 3.91  | TC10002447. chr10 | - | 6335137   | 6335689   | 30  | Broad                |
| TC06001715.hg.1 | -1.2 | 6.96  | -3.38 | 9.55E-04 | 1.14E-02 | -0.97 | TC06001715. chr6  | - | 41176292  | 41185685  | 50  | TREML3P RefSeq       |
| TC19000585.hg.1 | -1.2 | 8.7   | -5.5  | 1.80E-07 | 4.20E-05 | 6.96  | TC19000585. chr19 | + | 42300369  | 42316352  | 152 | CEACAM3 RefSeq       |
| TC01002060.hg.1 | -1.2 | 8.27  | -4.45 | 1.74E-05 | 6.24E-04 | 2.7   | TC01002060. chr1  | - | 536816    | 659930    | 93  | RP5-857K21.4 Havana  |
| TC04001137.hg.1 | -1.2 | 8.99  | -5.42 | 2.58E-07 | 5.07E-05 | 6.63  | TC04001137. chr4  | - | 40425272  | 40632892  | 344 | RBM47 RefSeq         |
| TC04001811.hg.1 | -1.2 | 6.47  | -4.29 | 3.38E-05 | 9.76E-04 | 2.09  | TC04001811. chr4  | - | 185764450 | 185776905 | 86  | LOC731424 RefSeq     |
| TC10000385.hg.1 | -1.2 | 8.73  | -5.77 | 5.05E-08 | 2.18E-05 | 8.16  | TC10000385. chr10 | + | 64893007  | 64914786  | 110 | NRBF2 RefSeq         |
| TC22001424.hg.1 | -1.2 | 10.08 | -4.22 | 4.35E-05 | 1.17E-03 | 1.86  | TC22001424. chr22 | + | 39348746  | 39388783  | 140 | POBEC3A_B RefSeq     |
| TC0X000066.hg.1 | -1.2 | 8.29  | -5.01 | 1.63E-06 | 1.46E-04 | 4.9   | TC0X000066. chrX  | + | 14891527  | 14940449  | 260 | MOSPD2 RefSeq        |
| TC08001644.hg.1 | -1.2 | 7.09  | -4.33 | 2.89E-05 | 8.82E-04 | 2.23  | TC08001644. chr8  | - | 131307601 | 131308779 | 30  | ASAP1-IT1 RefSeq     |
| TC01005805.hg.1 | -1.2 | 8.84  | -3.66 | 3.64E-04 | 5.54E-03 | -0.09 | TC01005805. chr1  | - | 149397114 | 149399229 | 30  | NONCODE              |
| TC07000407.hg.1 | -1.2 | 5.26  | -4.94 | 2.21E-06 | 1.75E-04 | 4.62  | TC07000407. chr7  | + | 65860178  | 65860273  | 30  | RNU6-96P ENSEMBL     |
| TC09001537.hg.1 | -1.2 | 10.1  | -5.9  | 2.75E-08 | 1.63E-05 | 8.73  | TC09001537. chr9  | - | 123363091 | 123476765 | 158 | MEGF9 RefSeq         |
| TC12003038.hg.1 | -1.2 | 5.16  | -3.38 | 9.46E-04 | 1.13E-02 | -0.96 | TC12003038. chr12 | - | 100447869 | 100448304 | 30  | NONCODE              |
| TC19001242.hg.1 | -1.2 | 10.39 | -4.78 | 4.52E-06 | 2.69E-04 | 3.95  | TC19001242. chr19 | - | 14843205  | 14889353  | 282 | EMR2 RefSeq          |
| TC08001643.hg.1 | -1.2 | 6.3   | -4.64 | 7.93E-06 | 3.72E-04 | 3.43  | TC08001643. chr8  | - | 131094984 | 131097014 | 30  | ASAP1-IT2 RefSeq     |
| TC19001353.hg.1 | -1.2 | 4.67  | -2.91 | 4.23E-03 | 3.51E-02 | -2.3  | TC19001353. chr19 | - | 21763358  | 21765406  | 30  | UCSC                 |
| TC18000581.hg.1 | -1.2 | 8.07  | -6.94 | 1.40E-10 | 3.36E-06 | 13.7  | TC18000581. chr18 | - | 74069637  | 74207146  | 90  | ZNF516 RefSeq        |
| TC04000775.hg.1 | -1.2 | 9.33  | -3.65 | 3.66E-04 | 5.56E-03 | -0.1  | TC04000775. chr4  | + | 154605441 | 154627242 | 80  | TLR2 RefSeq          |

|                 |      |       |       |          |          |       |                   |   |           |           |     |              |         |
|-----------------|------|-------|-------|----------|----------|-------|-------------------|---|-----------|-----------|-----|--------------|---------|
| TC13000100.hg.1 | -1.2 | 9.04  | -5.34 | 3.81E-07 | 6.38E-05 | 6.26  | TC13000100. chr13 | + | 31287615  | 31338565  | 90  | ALOX5AP      | RefSeq  |
| TC13001511.hg.1 | -1.2 | 8.36  | -2.82 | 5.53E-03 | 4.30E-02 | -2.53 | TC13001511. chr13 | - | 52387483  | 52419286  | 30  |              | NONCODE |
| TC17000117.hg.1 | -1.2 | 9.36  | -5.5  | 1.80E-07 | 4.20E-05 | 6.96  | TC17000117. chr17 | + | 7743222   | 7758118   | 250 | KDM6B        | RefSeq  |
| TC06000120.hg.1 | -1.2 | 8.66  | -4.77 | 4.56E-06 | 2.70E-04 | 3.94  | TC06000120. chr6  | + | 18368779  | 18469105  | 160 | RNF144B      | RefSeq  |
| TC11000182.hg.1 | -1.2 | 7.37  | -4.66 | 7.52E-06 | 3.60E-04 | 3.48  | TC11000182. chr11 | + | 10326227  | 10328944  | 151 | ADM          | RefSeq  |
| TC11002136.hg.1 | -1.2 | 9.21  | -5.14 | 9.38E-07 | 1.09E-04 | 5.42  | TC11002136. chr11 | - | 77926336  | 78128868  | 150 | GAB2         | RefSeq  |
| TC08000793.hg.1 | -1.2 | 9.15  | -5.23 | 6.10E-07 | 8.55E-05 | 5.82  | TC08000793. chr8  | + | 142127377 | 142205907 | 548 | DENND3       | RefSeq  |
| TC01002052.hg.1 | -1.2 | 8.05  | -4.21 | 4.57E-05 | 1.22E-03 | 1.81  | TC01002052. chr1  | - | 89295     | 133566    | 131 | RP11-34P13.7 | Havana  |
| TC15002774.hg.1 | -1.2 | 8.44  | -5.98 | 1.84E-08 | 1.43E-05 | 9.11  | TC15002774. chr15 | - | 55647421  | 55700708  | 238 | CCPG1        | RefSeq  |
| TC20001739.hg.1 | -1.2 | 8.48  | -4.51 | 1.40E-05 | 5.38E-04 | 2.91  | TC20001739. chr20 | + | 62921738  | 62944485  | 70  | LINC00266-1  | RefSeq  |
| TC14001288.hg.1 | -1.2 | 8.98  | -5.72 | 6.41E-08 | 2.34E-05 | 7.93  | TC14001288. chr14 | - | 73741815  | 73925323  | 247 | NUMB         | RefSeq  |
| TC06003117.hg.1 | -1.2 | 6.81  | -4.22 | 4.41E-05 | 1.19E-03 | 1.84  | TC06003117. chr6  | + | 147708804 | 147711601 | 30  |              | NONCODE |
| TC07000774.hg.1 | -1.2 | 9.53  | -4.25 | 3.85E-05 | 1.07E-03 | 1.97  | TC07000774. chr7  | + | 128043764 | 128043804 | 17  |              | GenBank |
| TC08001586.hg.1 | -1.2 | 9.53  | -4.25 | 3.85E-05 | 1.07E-03 | 1.97  | TC08001586. chr8  | - | 124412918 | 124412958 | 17  |              | GenBank |
| TC09000566.hg.1 | -1.2 | 5.88  | -4.43 | 1.93E-05 | 6.68E-04 | 2.61  | TC09000566. chr9  | + | 115178827 | 115180063 | 30  | HSDL2        | GenBank |
| TC19001826.hg.1 | -1.2 | 9.11  | -5.86 | 3.23E-08 | 1.80E-05 | 8.58  | TC19001826. chr19 | - | 54296855  | 54327648  | 152 | NLRP12       | RefSeq  |
| TC02002279.hg.1 | -1.2 | 9.41  | -5.32 | 4.08E-07 | 6.62E-05 | 6.2   | TC02002279. chr2  | - | 128056245 | 128146041 | 230 | MAP3K2       | RefSeq  |
| TC01003638.hg.1 | -1.2 | 7.81  | -4.29 | 3.33E-05 | 9.71E-04 | 2.1   | TC01003638. chr1  | - | 186640923 | 186649559 | 150 | PTGS2        | RefSeq  |
| TC01002819.hg.1 | -1.2 | 8.79  | -5.64 | 9.48E-08 | 2.96E-05 | 7.57  | TC01002819. chr1  | - | 85018804  | 85040163  | 101 | CTBS         | RefSeq  |
| TC14001116.hg.1 | -1.2 | 10.02 | -5.95 | 2.13E-08 | 1.44E-05 | 8.97  | TC14001116. chr14 | - | 50583846  | 50698276  | 274 | SOS2         | RefSeq  |
| TC13001006.hg.1 | -1.2 | 7.35  | -3.61 | 4.31E-04 | 6.29E-03 | -0.25 | TC13001006. chr13 | + | 32612375  | 32614415  | 30  | FRY          | NONCODE |
| TC20001465.hg.1 | -1.2 | 6.36  | -4.34 | 2.75E-05 | 8.49E-04 | 2.28  | TC20001465. chr20 | - | 20650317  | 20651034  | 30  |              | NONCODE |
| TC20000557.hg.1 | -1.2 | 6.14  | -4.19 | 4.89E-05 | 1.28E-03 | 1.75  | TC20000557. chr20 | - | 1784662   | 1798252   | 40  | RP5-968J1.1  | Havana  |
| TC03000637.hg.1 | -1.2 | 7.3   | -3.75 | 2.56E-04 | 4.24E-03 | 0.23  | TC03000637. chr3  | + | 122605360 | 122611263 | 30  | LOC100129550 | RefSeq  |
| TC0X000052.hg.1 | -1.2 | 9.67  | -4.81 | 3.92E-06 | 2.48E-04 | 4.09  | TC0X000052. chrX  | + | 12924739  | 12941288  | 50  | TLR8         | RefSeq  |
| TC10000115.hg.1 | -1.2 | 3.96  | -4.31 | 3.06E-05 | 9.14E-04 | 2.18  | TC10000115. chr10 | + | 15074226  | 15115851  | 189 | OLAH         | RefSeq  |
| TC19001593.hg.1 | -1.2 | 8.72  | -5.83 | 3.73E-08 | 1.89E-05 | 8.44  | TC19001593. chr19 | - | 44150247  | 44174502  | 100 | PLAUR        | RefSeq  |
| TC20000387.hg.1 | -1.2 | 6.75  | -3.34 | 1.07E-03 | 1.24E-02 | -1.07 | TC20000387. chr20 | + | 47895477  | 47895565  | 30  | SNORD12C     | RefSeq  |
| TC03002233.hg.1 | -1.2 | 7.67  | -4.64 | 7.97E-06 | 3.72E-04 | 3.43  | TC03002233. chr3  | + | 14460408  | 14461631  | 30  |              | NONCODE |
| TC16000137.hg.1 | -1.2 | 8.7   | -5.39 | 2.95E-07 | 5.58E-05 | 6.5   | TC16000137. chr16 | + | 4896666   | 4932363   | 240 | UBN1         | RefSeq  |
| TC15002652.hg.1 | -1.2 | 9.14  | -4.97 | 1.95E-06 | 1.63E-04 | 4.74  | TC15002652. chr15 | - | 80191182  | 80216096  | 20  | ST20         | NONCODE |
| TC20001650.hg.1 | -1.2 | 6.42  | -5.55 | 1.41E-07 | 3.73E-05 | 7.19  | TC20001650. chr20 | - | 52491042  | 52492248  | 30  |              | NONCODE |
| TC06001154.hg.1 | -1.2 | 7.33  | -5.21 | 6.80E-07 | 9.09E-05 | 5.72  | TC06001154. chr6  | + | 160542805 | 160579750 | 154 | SLC22A1      | RefSeq  |
| TC09002220.hg.1 | -1.2 | 5.16  | -4.53 | 1.29E-05 | 5.11E-04 | 2.98  | TC09002220. chr9  | + | 120521861 | 120565310 | 50  |              | Rinn    |
| TC16000375.hg.1 | -1.2 | 10.67 | -5.17 | 8.01E-07 | 1.01E-04 | 5.57  | TC16000375. chr16 | + | 31366509  | 31394318  | 370 | ITGAX        | RefSeq  |
| TC11001649.hg.1 | -1.2 | 6.12  | -5.52 | 1.64E-07 | 4.06E-05 | 7.05  | TC11001649. chr11 | - | 45721045  | 45721082  | 14  |              | GenBank |
| TC04002917.hg.1 | -1.2 | 9.35  | -4.56 | 1.12E-05 | 4.65E-04 | 3.11  | TC04002917. chr4  | - | 38825329  | 38858438  | 112 | TLR6         | RefSeq  |
| TC17001530.hg.1 | -1.2 | 7.66  | -3.76 | 2.48E-04 | 4.15E-03 | 0.25  | TC17001530. chr17 | - | 40423352  | 40424701  | 30  | AC003104.1   | Havana  |
| TC19001977.hg.1 | -1.2 | 7.68  | -4.84 | 3.51E-06 | 2.33E-04 | 4.19  | TC19001977. chr19 | + | 10396161  | 10396374  | 30  | ICAM1        | NONCODE |
| TC19001825.hg.1 | -1.2 | 6.35  | -6.65 | 6.32E-10 | 5.34E-06 | 12.28 | TC19001825. chr19 | - | 54290931  | 54290996  | 30  | MIR371B      | RefSeq  |
| TC01000352.hg.1 | -1.2 | 9.8   | -5.6  | 1.12E-07 | 3.24E-05 | 7.41  | TC01000352. chr1  | + | 27153201  | 27183406  | 160 | ZDHHC18      | RefSeq  |
| TC10000216.hg.1 | -1.2 | 6.68  | -5.67 | 8.22E-08 | 2.67E-05 | 7.7   | TC10000216. chr10 | + | 30981203  | 31005942  | 120 | SVILP1       | ENSEMBL |
| TC11000753.hg.1 | -1.2 | 7.65  | -3.75 | 2.64E-04 | 4.34E-03 | 0.2   | TC11000753. chr11 | + | 71883483  | 71889086  | 40  |              | ENSEMBL |
| TC06003642.hg.1 | -1.2 | 6.57  | -3.03 | 2.90E-03 | 2.65E-02 | -1.96 | TC06003642. chr6  | - | 41176294  | 41185685  | 50  |              | NONCODE |
| TC0X002184.hg.1 | -1.2 | 6.22  | -3.34 | 1.09E-03 | 1.26E-02 | -1.09 | TC0X002184. chrX  | - | 108975214 | 108975708 | 30  |              | NONCODE |
| TC09000857.hg.1 | -1.2 | 11.24 | -4.75 | 5.09E-06 | 2.87E-04 | 3.84  | TC09000857. chr9  | + | 141106637 | 141149300 | 147 | FAM157B      | RefSeq  |
| TC06001326.hg.1 | -1.2 | 5.79  | -6.43 | 1.98E-09 | 9.53E-06 | 11.21 | TC06001326. chr6  | - | 24544331  | 24646383  | 310 | KIAA0319     | RefSeq  |
| TC0Y000339.hg.1 | -1.2 | 7.62  | -4.37 | 2.39E-05 | 7.72E-04 | 2.41  | TC0Y000339. chrY  | - | 27524447  | 27540866  | 30  |              | Broad   |

|                         |      |       |       |          |          |       |                            |   |           |           |     |                         |
|-------------------------|------|-------|-------|----------|----------|-------|----------------------------|---|-----------|-----------|-----|-------------------------|
| TC22000937.hg.1         | -1.2 | 9.54  | -4.96 | 2.02E-06 | 1.67E-04 | 4.7   | TC22000937. chr22          | + | 17593918  | 17596583  | 60  | NONCODE                 |
| TC0X000206.hg.1         | -1.2 | 8.48  | -4.35 | 2.66E-05 | 8.31E-04 | 2.31  | TC0X000206. chrX           | + | 43137549  | 43137585  | 13  | GenBank                 |
| TC03002524.hg.1         | -1.2 | 9.34  | -5.61 | 1.06E-07 | 3.18E-05 | 7.46  | TC03002524. chr3           | + | 127391781 | 127399769 | 114 | ABTB1<br>NONCODE        |
| TC01001315.hg.1         | -1.2 | 8.23  | -5.73 | 5.98E-08 | 2.29E-05 | 8     | TC01001315. chr1           | + | 156163730 | 156182587 | 192 | SLC25A44<br>RefSeq      |
| TC20001279.hg.1         | -1.2 | 7.1   | -4.1  | 6.95E-05 | 1.62E-03 | 1.42  | TC20001279. chr20          | + | 48909257  | 48932000  | 112 | Rinn                    |
| TC07001901.hg.1         | -1.2 | 9.53  | -4.17 | 5.32E-05 | 1.35E-03 | 1.67  | TC07001901. chr7           | - | 138125547 | 138125585 | 15  | GenBank                 |
| TC20000685.hg.1         | -1.2 | 8.55  | -5.02 | 1.60E-06 | 1.44E-04 | 4.92  | TC20000685. chr20          | - | 20370196  | 20693266  | 542 | RALGAPA2<br>RefSeq      |
| TC20001464.hg.1         | -1.2 | 7.79  | -3.88 | 1.63E-04 | 3.06E-03 | 0.64  | TC20001464. chr20          | - | 20389471  | 20390912  | 30  | RALGAPA2<br>NONCODE     |
| TC01002990.hg.1         | -1.2 | 7.73  | -5.52 | 1.64E-07 | 4.06E-05 | 7.05  | TC01002990. chr1           | - | 112264686 | 112298446 | 73  | FAM212B<br>RefSeq       |
| TC19000228.hg.1         | -1.2 | 8.91  | -5.3  | 4.45E-07 | 7.00E-05 | 6.12  | TC19000228. chr19          | + | 12902310  | 12904125  | 30  | JUNB<br>RefSeq          |
| TC20001488.hg.1         | -1.2 | 8.08  | -2.99 | 3.31E-03 | 2.93E-02 | -2.08 | TC20001488. chr20          | - | 23046042  | 23052105  | 30  | Rinn                    |
| TC20000527.hg.1         | -1.2 | 7.4   | -5.22 | 6.34E-07 | 8.78E-05 | 5.79  | TC20000527. chr20          | + | 62507484  | 62512243  | 30  | LOC100505815<br>RefSeq  |
| TC07001738.hg.1         | -1.2 | 10.46 | -4.97 | 1.92E-06 | 1.62E-04 | 4.75  | TC07001738. chr7           | - | 105888731 | 105926772 | 329 | MPT<br>RefSeq           |
| TC02003275.hg.1         | -1.2 | 6.11  | -3.1  | 2.38E-03 | 2.28E-02 | -1.79 | TC02003275. chr2           | + | 64566991  | 64581542  | 30  | AC008074.4<br>NONCODE   |
| TC08002026.hg.1         | -1.2 | 9.53  | -4.6  | 9.51E-06 | 4.18E-04 | 3.26  | TC08002026. chr8           | + | 97797356  | 97847419  | 30  | CPQ<br>NONCODE          |
| TC08002487.hg.1         | -1.2 | 7.27  | -3.55 | 5.20E-04 | 7.16E-03 | -0.42 | TC08002487. chr8           | - | 119097734 | 119100498 | 30  | NONCODE                 |
| TC01003774.hg.1         | -1.2 | 4.82  | -3.9  | 1.48E-04 | 2.84E-03 | 0.73  | TC01003774. chr1           | - | 207725270 | 207726324 | 30  | RP11-78B10.2<br>Havana  |
| TC10000360.hg.1         | -1.2 | 9.34  | -3.94 | 1.30E-04 | 2.58E-03 | 0.85  | TC10000360. chr10          | + | 60094735  | 60130513  | 111 | UBE2D1<br>RefSeq        |
| TC0X000356.hg.1         | -1.2 | 10.04 | -4.54 | 1.22E-05 | 4.92E-04 | 3.03  | TC0X000356. chrX           | + | 65235303  | 65240264  | 50  | MIR223<br>RefSeq        |
| TC07002619.hg.1         | -1.2 | 8.9   | -3.7  | 3.09E-04 | 4.87E-03 | 0.06  | TC07002619. chr7           | + | 139639478 | 139646962 | 30  | NONCODE                 |
| TC02001749.hg.1         | -1.2 | 7.05  | -2.87 | 4.78E-03 | 3.84E-02 | -2.41 | TC02001749. chr2           | - | 38294116  | 38297840  | 30  | CYP1B1<br>Havana        |
| TC08001690.hg.1         | -1.2 | 8.37  | -4.98 | 1.91E-06 | 1.61E-04 | 4.76  | TC08001690. chr8           | - | 142217265 | 142318404 | 220 | SLC45A4<br>RefSeq       |
| TC20001675.hg.1         | -1.2 | 7.15  | -4.92 | 2.39E-06 | 1.83E-04 | 4.55  | TC20001675. chr20          | - | 56807833  | 56884495  | 160 | PPP4R1L<br>NONCODE      |
| TC05000398.hg.1         | -1.2 | 7.42  | -4.87 | 3.08E-06 | 2.13E-04 | 4.31  | TC05000398. chr5           | + | 79703832  | 79775498  | 380 | ZFYVE16<br>RefSeq       |
| TC16001724.hg.1         | -1.2 | 11.45 | -4.7  | 6.26E-06 | 3.24E-04 | 3.65  | TC16001724. chr16          | + | 90168702  | 90204399  | 90  | Broad                   |
| TC11002623.hg.1         | -1.2 | 5.74  | -2.87 | 4.73E-03 | 3.81E-02 | -2.4  | TC11002623. chr11          | + | 32875249  | 32879666  | 30  | PRRG4<br>NONCODE        |
| TC6_mcf_hap5000121.hg.1 | -1.2 | 9.04  | -5.22 | 6.44E-07 | 8.81E-05 | 5.77  | TC6_mcf_hap5 chr6_mcf_hap5 | - | 2077369   | 2091199   | 167 | FLOT1<br>RefSeq         |
| TC16002057.hg.1         | -1.2 | 6.24  | -3.52 | 5.90E-04 | 7.89E-03 | -0.53 | TC16002057. chr16          | + | 72088508  | 72094955  | 98  | HP<br>RefSeq            |
| TC06001941.hg.1         | -1.2 | 7.31  | -6.41 | 2.19E-09 | 9.87E-06 | 11.11 | TC06001941. chr6           | - | 90074335  | 90121995  | 130 | RRAGD<br>RefSeq         |
| TC07002428.hg.1         | -1.2 | 5.93  | -4.17 | 5.27E-05 | 1.34E-03 | 1.68  | TC07002428. chr7           | + | 77313168  | 77314645  | 30  | NONCODE                 |
| TC19000470.hg.1         | -1.2 | 9.61  | -3.57 | 4.96E-04 | 6.93E-03 | -0.38 | TC19000470. chr19          | + | 35939203  | 35942669  | 40  | FFAR2<br>RefSeq         |
| TC02003718.hg.1         | -1.2 | 6.8   | -3.65 | 3.78E-04 | 5.70E-03 | -0.13 | TC02003718. chr2           | + | 179419288 | 179423693 | 30  | NONCODE                 |
| TC01002322.hg.1         | -1.2 | 9.3   | -5.56 | 1.35E-07 | 3.68E-05 | 7.23  | TC01002322. chr1           | - | 21543740  | 21672034  | 376 | ECE1<br>RefSeq          |
| TC15002546.hg.1         | -1.2 | 6.61  | -6.54 | 1.10E-09 | 6.72E-06 | 11.76 | TC15002546. chr15          | - | 55647421  | 55790782  | 160 | DYX1C1-CCPG1<br>NONCODE |
| TC05002297.hg.1         | -1.2 | 6.68  | -3.82 | 2.02E-04 | 3.58E-03 | 0.44  | TC05002297. chr5           | + | 17444119  | 17485937  | 60  | Rinn                    |
| TC13001007.hg.1         | -1.2 | 6.85  | -4.06 | 8.12E-05 | 1.81E-03 | 1.28  | TC13001007. chr13          | + | 32632895  | 32633647  | 60  | NONCODE                 |
| TC20000556.hg.1         | -1.2 | 7.27  | -4.71 | 6.07E-06 | 3.17E-04 | 3.68  | TC20000556. chr20          | - | 1754011   | 1760392   | 40  | LOC100289473<br>RefSeq  |
| TC10002943.hg.1         | -1.2 | 8.59  | -4.39 | 2.24E-05 | 7.39E-04 | 2.47  | TC10002943. chr10          | + | 97454774  | 97637023  | 405 | ENTPD1<br>RefSeq        |
| TC10002659.hg.1         | -1.2 | 6.52  | -3.86 | 1.75E-04 | 3.24E-03 | 0.57  | TC10002659. chr10          | - | 59960595  | 59961847  | 30  | NONCODE                 |
| TC10000541.hg.1         | -1.2 | 8.74  | -5.67 | 8.17E-08 | 2.66E-05 | 7.71  | TC10000541. chr10          | + | 79540542  | 79540571  | 6   | GenBank                 |
| TC04001740.hg.1         | -1.2 | 6.41  | -3.71 | 3.04E-04 | 4.80E-03 | 0.07  | TC04001740. chr4           | - | 174243357 | 174250845 | 30  | RP11-798M19.3<br>Havana |
| TC19001180.hg.1         | -1.2 | 9.69  | -3.67 | 3.45E-04 | 5.32E-03 | -0.05 | TC19001180. chr19          | - | 11411545  | 11431999  | 26  | GenBank                 |
| TC16000717.hg.1         | -1.2 | 10.89 | -4.61 | 9.00E-06 | 4.01E-04 | 3.31  | TC16000717. chr16          | + | 90237092  | 90238407  | 29  | GenBank                 |
| TC10002542.hg.1         | -1.2 | 8.09  | -3.78 | 2.36E-04 | 4.02E-03 | 0.3   | TC10002542. chr10          | - | 31133565  | 31320866  | 70  | ZNF438<br>NONCODE       |
| TC11001192.hg.1         | -1.2 | 7.47  | -5.48 | 2.00E-07 | 4.45E-05 | 6.86  | TC11001192. chr11          | + | 129685714 | 129729898 | 114 | TMEM45B<br>RefSeq       |
| TC08000591.hg.1         | -1.2 | 8.42  | -5.14 | 9.34E-07 | 1.09E-04 | 5.42  | TC08000591. chr8           | + | 97657455  | 98161882  | 195 | CPQ<br>RefSeq           |
| TC10001444.hg.1         | -1.2 | 10.43 | -5.41 | 2.70E-07 | 5.24E-05 | 6.59  | TC10001444. chr10          | - | 79541030  | 79541072  | 19  | GenBank                 |
| TC10001144.hg.1         | -1.2 | 8.51  | -5.37 | 3.29E-07 | 5.89E-05 | 6.4   | TC10001144. chr10          | - | 29746267  | 30025864  | 635 | SVIL<br>RefSeq          |

|                         |      |       |       |          |          |       |                          |   |           |           |     |               |         |
|-------------------------|------|-------|-------|----------|----------|-------|--------------------------|---|-----------|-----------|-----|---------------|---------|
| TC16001663.hg.1         | -1.2 | 7.07  | -4.3  | 3.22E-05 | 9.46E-04 | 2.13  | TC16001663. chr16        | + | 81994217  | 81996288  | 30  | PLCG2         | NONCODE |
| TC0X000188.hg.1         | -1.2 | 9.43  | -3.97 | 1.14E-04 | 2.34E-03 | 0.97  | TC0X000188. chrX         | + | 40219848  | 40219877  | 6   |               | GenBank |
| TC08001550.hg.1         | -1.2 | 7.27  | -3.54 | 5.50E-04 | 7.46E-03 | -0.47 | TC08001550. chr8         | - | 119097733 | 119100498 | 30  |               | GenBank |
| TC0X000956.hg.1         | -1.2 | 6.53  | -3.95 | 1.27E-04 | 2.54E-03 | 0.87  | TC0X000956. chrX         | - | 38167365  | 38167494  | 30  |               | ENSEMBL |
| TC12001157.hg.1         | -1.2 | 8.16  | -5.53 | 1.58E-07 | 3.97E-05 | 7.09  | TC12001157. chr12        | - | 7246303   | 7261869   | 162 | C1RL          | RefSeq  |
| TC17001943.hg.1         | -1.2 | 6.97  | -5.99 | 1.74E-08 | 1.43E-05 | 9.16  | TC17001943. chr17        | - | 79099683  | 79099749  | 30  | MIR338        | RefSeq  |
| TC11000544.hg.1         | -1.2 | 8.08  | -5.75 | 5.56E-08 | 2.25E-05 | 8.07  | TC11000544. chr11        | + | 61717293  | 61732987  | 266 | BEST1         | RefSeq  |
| TC02003717.hg.1         | -1.2 | 6.94  | -3.66 | 3.54E-04 | 5.43E-03 | -0.07 | TC02003717. chr2         | + | 179413611 | 179415408 | 30  | TTN           | NONCODE |
| TC0Y000006.hg.1         | -1.2 | 9.51  | -5.09 | 1.18E-06 | 1.21E-04 | 5.21  | TC0Y000006. chrY         | + | 1337693   | 1379274   | 186 | CSF2RA        | RefSeq  |
| TC04000612.hg.1         | -1.2 | 6.41  | -3.72 | 2.94E-04 | 4.69E-03 | 0.1   | TC04000612. chr4         | + | 120288717 | 120288801 | 30  | RNU4-33P      | ENSEMBL |
| TC11000310.hg.1         | -1.2 | 7.95  | -3.35 | 1.04E-03 | 1.22E-02 | -1.05 | TC11000310. chr11        | + | 32851481  | 32879669  | 80  | PRRG4         | RefSeq  |
| TC01003550.hg.1         | -1.2 | 5.11  | -3.88 | 1.60E-04 | 3.02E-03 | 0.66  | TC01003550. chr1         | - | 175873898 | 175889649 | 30  | RP11-318C24.2 | Havana  |
| TC13000110.hg.1         | -1.2 | 6.4   | -4.51 | 1.40E-05 | 5.39E-04 | 2.9   | TC13000110. chr13        | + | 32872291  | 32872849  | 30  | RP11-37E23.5  | NONCODE |
| TC01005732.hg.1         | -1.2 | 8     | -5.62 | 1.03E-07 | 3.13E-05 | 7.48  | TC01005732. chr1         | - | 117057156 | 117113715 | 70  | CD58          | NONCODE |
| TC16000812.hg.1         | -1.2 | 9.42  | -5.37 | 3.23E-07 | 5.85E-05 | 6.42  | TC16000812. chr16        | - | 3292027   | 3306627   | 158 | MEFV          | RefSeq  |
| TC03002165.hg.1         | -1.2 | 8.53  | -4.66 | 7.53E-06 | 3.60E-04 | 3.48  | TC03002165. chr3         | - | 196433148 | 196439164 | 50  | CEP19         | RefSeq  |
| TC0X000006.hg.1         | -1.2 | 9.22  | -5.14 | 9.16E-07 | 1.08E-04 | 5.44  | TC0X000006. chrX         | + | 1387693   | 1429274   | 288 | CSF2RA        | RefSeq  |
| TC08000488.hg.1         | -1.2 | 6.34  | -4.58 | 1.05E-05 | 4.45E-04 | 3.17  | TC08000488. chr8         | + | 74960912  | 74961019  | 30  | RNU6-1300P    | ENSEMBL |
| TC10000182.hg.1         | -1.2 | 9.13  | -4.32 | 2.92E-05 | 8.86E-04 | 2.22  | TC10000182. chr10        | + | 26798518  | 26798633  | 30  | R5SP307       | ENSEMBL |
| TC16000714.hg.1         | -1.2 | 11.43 | -4.53 | 1.26E-05 | 5.03E-04 | 3     | TC16000714. chr16        | + | 90168702  | 90204399  | 90  |               | UCSC    |
| TC02002145.hg.1         | -1.2 | 10.06 | -4.57 | 1.09E-05 | 4.58E-04 | 3.13  | TC02002145. chr2         | - | 101887681 | 101925178 | 173 | RNF149        | RefSeq  |
| TC20001365.hg.1         | -1.2 | 8.59  | -4.87 | 3.07E-06 | 2.13E-04 | 4.31  | TC20001365. chr20        | + | 62921738  | 62944485  | 60  |               | Broad   |
| TC01005955.hg.1         | -1.2 | 5.13  | -4.02 | 9.53E-05 | 2.05E-03 | 1.13  | TC01005955. chr1         | - | 175873898 | 175889649 | 30  |               | Rinn    |
| TC02004970.hg.1         | -1.2 | 11.17 | -5.53 | 1.54E-07 | 3.92E-05 | 7.11  | TC02004970. chr2         | + | 70142173  | 70170077  | 213 | MXD1          | RefSeq  |
| TC15000951.hg.1         | -1.2 | 5.9   | -4.49 | 1.47E-05 | 5.58E-04 | 2.86  | TC15000951. chr15        | + | 99441845  | 99443609  | 30  | IGF1R         | GenBank |
| TC01000462.hg.1         | -1.2 | 9.85  | -5.55 | 1.39E-07 | 3.72E-05 | 7.2   | TC01000462. chr1         | + | 36273773  | 36323491  | 260 | AGO4          | RefSeq  |
| TC19001102.hg.1         | -1.2 | 8.54  | -5.77 | 5.00E-08 | 2.18E-05 | 8.17  | TC19001102. chr19        | - | 6663148   | 6670599   | 60  | TNFSF14       | RefSeq  |
| TC20000391.hg.1         | -1.2 | 8.84  | -5.11 | 1.05E-06 | 1.15E-04 | 5.32  | TC20000391. chr20        | + | 48429250  | 48508779  | 240 | SLC9A8        | RefSeq  |
| TC09002052.hg.1         | -1.2 | 5.78  | -3.98 | 1.10E-04 | 2.28E-03 | 1.01  | TC09002052. chr9         | + | 88358355  | 88401763  | 80  |               | Broad   |
| TC15002747.hg.1         | -1.2 | 5.3   | -3.76 | 2.53E-04 | 4.21E-03 | 0.24  | TC15002747. chr15        | - | 101709636 | 101711509 | 30  |               | Rinn    |
| TC10002194.hg.1         | -1.2 | 7.45  | -3.57 | 5.01E-04 | 6.98E-03 | -0.38 | TC10002194. chr10        | + | 89706925  | 89708694  | 30  | PTEN          | NONCODE |
| TC03000087.hg.1         | -1.2 | 9.63  | -5.13 | 9.73E-07 | 1.10E-04 | 5.39  | TC03000087. chr3         | + | 14444076  | 14530857  | 279 | SLC6A6        | RefSeq  |
| TC15002712.hg.1         | -1.2 | 4.65  | -3.98 | 1.11E-04 | 2.29E-03 | 0.99  | TC15002712. chr15        | - | 93323486  | 93324722  | 30  |               | NONCODE |
| TC02002767.hg.1         | -1.2 | 10.87 | -4.68 | 6.94E-06 | 3.42E-04 | 3.56  | TC02002767. chr2         | - | 219027568 | 219031725 | 99  | CXCR1         | RefSeq  |
| TC01005312.hg.1         | -1.2 | 6.71  | -4.63 | 8.55E-06 | 3.90E-04 | 3.36  | TC01005312. chr1         | - | 21602543  | 21604868  | 30  |               | NONCODE |
| TC01001276.hg.1         | -1.2 | 9.47  | -4.67 | 9.71E-06 | 4.63E-04 | 3.27  | TC01001276. chr1         | + | 154377669 | 154441926 | 227 | IL6R          | RefSeq  |
| TC19002293.hg.1         | 1.2  | 10.64 | 5.1   | 1.70E-06 | 1.58E-04 | 4.9   | TC19002293. chr19        | - | 3053866   | 3061276   | 60  | AES           | NONCODE |
| TC08000529.hg.1         | 1.2  | 4.94  | 5.52  | 2.90E-07 | 6.64E-05 | 6.56  | TC08000529. chr8         | + | 86089460  | 86129387  | 232 | E2F5          | RefSeq  |
| TC12001544.hg.1         | 1.2  | 8.52  | 6.27  | 1.00E-08 | 1.94E-05 | 9.72  | TC12001544. chr12        | - | 53585107  | 53601091  | 235 | ITGB7         | RefSeq  |
| TC6_apd_hap1000118.hg.1 | 1.2  | 9.08  | 4.74  | 7.50E-06 | 3.88E-04 | 3.51  | TC6_apd_hap1000118. chr6 | - | 4203376   | 4207888   | 125 | HLA-DMA       | RefSeq  |
| TC01005671.hg.1         | 1.2  | 9.05  | 4.65  | 7.69E-06 | 3.64E-04 | 3.46  | TC01005671. chr1         | - | 102251817 | 102252854 | 30  |               | Broad   |
| TC11002439.hg.1         | 1.2  | 9.3   | 5.81  | 4.12E-08 | 2.00E-05 | 8.35  | TC11002439. chr11        | - | 128328656 | 128457453 | 190 | ETS1          | RefSeq  |
| TC15000045.hg.1         | 1.2  | 6.76  | 4.06  | 8.36E-05 | 1.85E-03 | 1.25  | TC15000045. chr15        | + | 25230007  | 25233379  | 50  | SNORD108      | RefSeq  |
| TC01004246.hg.1         | 1.2  | 7.73  | 3.91  | 1.45E-04 | 2.81E-03 | 0.74  | TC01004246. chr1         | + | 24865207  | 24865735  | 30  |               | NONCODE |
| TC0X000427.hg.1         | 1.2  | 7.4   | 3.75  | 2.63E-04 | 4.33E-03 | 0.2   | TC0X000427. chrX         | + | 78200829  | 78217451  | 89  | P2RY10        | RefSeq  |
| TC06001577.hg.1         | 1.2  | 7.18  | 5.99  | 1.71E-08 | 1.43E-05 | 9.18  | TC06001577. chr6         | - | 32971955  | 32977389  | 207 | HLA-DOA       | RefSeq  |
| TC01002663.hg.1         | 1.2  | 6.23  | 4.43  | 1.95E-05 | 6.75E-04 | 2.6   | TC01002663. chr1         | - | 53458868  | 53459251  | 30  |               | ENSEMBL |
| TC0X000428.hg.1         | 1.2  | 8.22  | 3.41  | 8.53E-04 | 1.05E-02 | -0.87 | TC0X000428. chrX         | + | 78426469  | 78427726  | 30  | GPR174        | RefSeq  |

|                          |     |       |      |          |          |       |                           |   |           |           |      |              |         |
|--------------------------|-----|-------|------|----------|----------|-------|---------------------------|---|-----------|-----------|------|--------------|---------|
| TC02002490.hg.1          | 1.2 | 4.4   | 3.63 | 3.99E-04 | 5.94E-03 | -0.18 | TC02002490. chr2          | - | 165752696 | 165812035 | 287  | SLC38A11     | RefSeq  |
| TC01003767.hg.1          | 1.2 | 8.92  | 4.72 | 5.71E-06 | 3.04E-04 | 3.74  | TC01003767. chr1          | - | 207076631 | 207095378 | 180  | FAIM3        | RefSeq  |
| TC17001637.hg.1          | 1.2 | 7.77  | 5.15 | 8.71E-07 | 1.06E-04 | 5.49  | TC17001637. chr17         | - | 46210802  | 46507594  | 146  | SKAP1        | RefSeq  |
| TC14002189.hg.1          | 1.2 | 8.09  | 3.11 | 2.28E-03 | 2.21E-02 | -1.75 | TC14002189. chr14         | - | 106068003 | 107218968 | 1076 | IGHG1        | NONCODE |
| TC02004724.hg.1          | 1.2 | 6.91  | 4.48 | 1.53E-05 | 5.72E-04 | 2.82  | TC02004724. chr2          | - | 179537189 | 179544381 | 60   | TTN          | NONCODE |
| TC14001478.hg.1          | 1.2 | 7.28  | 3.88 | 1.64E-04 | 3.08E-03 | 0.63  | TC14001478. chr14         | - | 96176304  | 96180533  | 80   | TCL1A        | RefSeq  |
| TC14001441.hg.1          | 1.2 | 9.02  | 4.71 | 5.92E-06 | 3.11E-04 | 3.7   | TC14001441. chr14         | - | 92246095  | 92333880  | 218  | TC2N         | RefSeq  |
| TC06001094.hg.1          | 1.2 | 5.66  | 5.44 | 2.35E-07 | 4.86E-05 | 6.71  | TC06001094. chr6          | + | 150920999 | 151164799 | 315  | PLEKHG1      | RefSeq  |
| TC02002478.hg.1          | 1.2 | 7.06  | 4.62 | 8.58E-06 | 3.90E-04 | 3.36  | TC02002478. chr2          | - | 162848751 | 162931052 | 410  | DPP4         | RefSeq  |
| TC15000049.hg.1          | 1.2 | 5.71  | 2.92 | 4.08E-03 | 3.41E-02 | -2.27 | TC15000049. chr15         | + | 25299356  | 25299452  | 30   | SNORD116-2   | RefSeq  |
| TC02000038.hg.1          | 1.2 | 6.22  | 2.94 | 3.88E-03 | 3.29E-02 | -2.22 | TC02000038. chr2          | + | 7865932   | 7870836   | 30   | LOC101929531 | ENSEMBL |
| TC06004125.hg.1          | 1.2 | 6.96  | 3.27 | 1.35E-03 | 1.48E-02 | -1.28 | TC06004125. chr6          | - | 32780540  | 32784825  | 148  | HLA-DOB      | RefSeq  |
| TC01004517.hg.1          | 1.2 | 4.58  | 2.81 | 5.61E-03 | 4.35E-02 | -2.55 | TC01004517. chr1          | + | 89647181  | 89647394  | 30   |              | NONCODE |
| TC15000436.hg.1          | 1.2 | 7.1   | 4.29 | 3.35E-05 | 9.74E-04 | 2.1   | TC15000436. chr15         | + | 57592563  | 57599967  | 72   | LINC00926    | RefSeq  |
| TC04002090.hg.1          | 1.2 | 8.6   | 4.68 | 6.70E-06 | 3.37E-04 | 3.59  | TC04002090. chr4          | + | 84009930  | 84010394  | 33   |              | Rinn    |
| TC10001863.hg.1          | 1.2 | 6.24  | 3.01 | 3.11E-03 | 2.79E-02 | -2.03 | TC10001863. chr10         | + | 6660597   | 6667308   | 66   |              | Rinn    |
| TC03000563.hg.1          | 1.2 | 8.84  | 4.68 | 6.67E-06 | 3.36E-04 | 3.59  | TC03000563. chr3          | + | 111260926 | 111384597 | 248  | CD96         | RefSeq  |
| TC0X000666.hg.1          | 1.2 | 7.32  | 3.68 | 3.31E-04 | 5.14E-03 | -0.01 | TC0X000666. chrX          | + | 135730336 | 135742549 | 70   | CD40LG       | RefSeq  |
| TC14000101.hg.1          | 1.2 | 6.69  | 3.74 | 2.66E-04 | 4.36E-03 | 0.19  | TC14000101. chr14         | + | 22336980  | 22733726  | 30   | TRAV13-1     | ENSEMBL |
| TC12001578.hg.1          | 1.2 | 8.69  | 4.66 | 7.35E-06 | 3.55E-04 | 3.5   | TC12001578. chr12         | - | 55341802  | 55378456  | 210  | TESPA1       | RefSeq  |
| TC16000386.hg.1          | 1.2 | 7.18  | 2.91 | 4.20E-03 | 3.49E-02 | -2.29 | TC16000386. chr16         | + | 32063311  | 32063601  | 30   |              | ENSEMBL |
| TC08002364.hg.1          | 1.2 | 7.79  | 2.71 | 7.63E-03 | 5.47E-02 | -2.82 | TC08002364. chr8          | - | 67476954  | 67525175  | 160  | MYBL1        | NONCODE |
| TC04001092.hg.1          | 1.2 | 7.51  | 6    | 1.65E-08 | 1.43E-05 | 9.21  | TC04001092. chr4          | - | 25749049  | 25865382  | 437  | SEL1L3       | RefSeq  |
| TC6_mcf_hap5000170.hg.1  | 1.2 | 7.72  | 4.3  | 3.24E-05 | 9.51E-04 | 2.13  | TC6_mcf_hap5000170. chr6  | - | 3961419   | 3970467   | 100  | HLA-DQB1     | GenBank |
| TC15000064.hg.1          | 1.2 | 8.73  | 3.23 | 1.55E-03 | 1.63E-02 | -1.4  | TC15000064. chr15         | + | 25330531  | 25330624  | 30   | SNORD116-18  | RefSeq  |
| TC14001586.hg.1          | 1.2 | 6.13  | 3.43 | 7.99E-04 | 9.96E-03 | -0.81 | TC14001586. chr14         | + | 22180592  | 22181058  | 17   |              | NONCODE |
| TC15000051.hg.1          | 1.2 | 5.31  | 3.53 | 5.65E-04 | 7.63E-03 | -0.49 | TC15000051. chr15         | + | 25307479  | 25307575  | 30   | SNORD116-5   | RefSeq  |
| TC15000053.hg.1          | 1.2 | 5.31  | 3.53 | 5.65E-04 | 7.63E-03 | -0.49 | TC15000053. chr15         | + | 25312934  | 25313030  | 30   | SNORD116-5   | RefSeq  |
| TC15002563.hg.1          | 1.2 | 7.39  | 3.58 | 4.81E-04 | 6.76E-03 | -0.35 | TC15002563. chr15         | - | 60780483  | 60783123  | 30   | RORA         | NONCODE |
| TC05000865.hg.1          | 1.2 | 8.39  | 4.84 | 3.49E-06 | 2.32E-04 | 4.2   | TC05000865. chr5          | + | 156569944 | 156682201 | 323  | ITK          | RefSeq  |
| TC02005047.hg.1          | 1.2 | 6.41  | 4.48 | 1.57E-05 | 5.83E-04 | 2.8   | TC02005047. chr2          | - | 179390716 | 179672150 | 3708 | TTN          | RefSeq  |
| TC11001061.hg.1          | 1.2 | 9.36  | 4.38 | 2.33E-05 | 7.61E-04 | 2.43  | TC11001061. chr11         | + | 118215059 | 118225876 | 126  | CD3G         | RefSeq  |
| TC03001052.hg.1          | 1.2 | 6.81  | 4.87 | 3.09E-06 | 2.13E-04 | 4.31  | TC03001052. chr3          | + | 191046866 | 191116459 | 160  | CCDC50       | RefSeq  |
| TC15000052.hg.1          | 1.2 | 5.68  | 3.15 | 2.01E-03 | 2.00E-02 | -1.64 | TC15000052. chr15         | + | 25310172  | 25310269  | 30   | SNORD116-2   | RefSeq  |
| TC01001758.hg.1          | 1.2 | 6.93  | 5.76 | 5.31E-08 | 2.18E-05 | 8.11  | TC01001758. chr1          | + | 211499957 | 211548288 | 226  | TRAF5        | RefSeq  |
| TC12001426.hg.1          | 1.2 | 9.12  | 6.02 | 1.52E-08 | 1.43E-05 | 9.28  | TC12001426. chr12         | - | 46576841  | 46663208  | 267  | SLC38A1      | RefSeq  |
| TC01005698.hg.1          | 1.2 | 6.9   | 3.95 | 1.24E-04 | 2.50E-03 | 0.89  | TC01005698. chr1          | - | 111196209 | 111197947 | 30   |              | NONCODE |
| TC14000126.hg.1          | 1.2 | 8.35  | 3.29 | 1.29E-03 | 1.43E-02 | -1.24 | TC14000126. chr14         | + | 22999278  | 22999329  | 28   | TRAJ14       | ENSEMBL |
| TC18000554.hg.1          | 1.2 | 8.62  | 5.24 | 5.86E-07 | 8.38E-05 | 5.86  | TC18000554. chr18         | - | 60790579  | 60987361  | 109  | BCL2         | RefSeq  |
| TC15001217.hg.1          | 1.2 | 8.63  | 5.16 | 8.63E-07 | 1.05E-04 | 5.5   | TC15001217. chr15         | - | 38780302  | 38857776  | 230  | RASGRP1      | RefSeq  |
| TC15002091.hg.1          | 1.2 | 6.82  | 4.46 | 1.72E-05 | 6.19E-04 | 2.71  | TC15002091. chr15         | + | 25230007  | 25233381  | 60   | PWAR5        | NONCODE |
| TC6_dbb_hap3000180.hg.1  | 1.2 | 11.25 | 3.99 | 1.09E-04 | 2.27E-03 | 1.01  | TC6_dbb_hap3000180. chr6  | - | 3794488   | 3794590   | 8    | HLA-DRB1     | GenBank |
| TC14001850.hg.1          | 1.2 | 8.06  | 5.71 | 6.56E-08 | 2.36E-05 | 7.91  | TC14001850. chr14         | + | 100610216 | 100610573 | 30   |              | NONCODE |
| TC02001083.hg.1          | 1.2 | 9.01  | 5.24 | 5.84E-07 | 8.38E-05 | 5.86  | TC02001083. chr2          | + | 182321619 | 182402468 | 480  | ITGA4        | RefSeq  |
| TC6_dbb_hap3000084.hg.1  | 1.2 | 7.27  | 3.74 | 2.70E-04 | 4.41E-03 | 0.18  | TC6_dbb_hap3000084. chr6  | + | 3877688   | 3900041   | 185  | HLA-DQA1     | GenBank |
| TC6_mann_hap4000075.hg.1 | 1.2 | 7.27  | 3.74 | 2.70E-04 | 4.41E-03 | 0.18  | TC6_mann_hap4000075. chr6 | + | 4052121   | 4074486   | 185  | HLA-DQA1     | GenBank |
| TC01001974.hg.1          | 1.2 | 5.6   | 4.42 | 2.01E-05 | 6.89E-04 | 2.57  | TC01001974. chr1          | + | 241695434 | 241758949 | 280  | KMO          | RefSeq  |
| TC05002628.hg.1          | 1.2 | 9.08  | 4.09 | 7.38E-05 | 1.69E-03 | 1.37  | TC05002628. chr5          | + | 133451350 | 133483920 | 80   | TCF7         | NONCODE |

|                          |     |      |      |          |          |       |                              |   |           |           |     |              |         |
|--------------------------|-----|------|------|----------|----------|-------|------------------------------|---|-----------|-----------|-----|--------------|---------|
| TC14002280.hg.1          | 1.2 | 7.5  | 2.8  | 5.90E-03 | 4.52E-02 | -2.59 | TC14002280. chr14            | - | 107169931 | 107170428 | 22  | IGHV1-69     | ENSEMBL |
| TC16001073.hg.1          | 1.2 | 7.06 | 2.89 | 4.44E-03 | 3.64E-02 | -2.34 | TC16001073. chr16            | - | 33740806  | 33741090  | 30  |              | ENSEMBL |
| TC15000061.hg.1          | 1.2 | 9.23 | 2.96 | 3.62E-03 | 3.13E-02 | -2.16 | TC15000061. chr15            | + | 25326433  | 25326526  | 30  | SNORD116-15  | RefSeq  |
| TC11003270.hg.1          | 1.2 | 5.71 | 4.23 | 4.31E-05 | 1.17E-03 | 1.86  | TC11003270. chr11            | - | 82686479  | 82688475  | 30  | RAB30        | NONCODE |
| TC14002284.hg.1          | 1.2 | 6.98 | 2.98 | 3.36E-03 | 2.96E-02 | -2.09 | TC14002284. chr14            | - | 107218676 | 107219365 | 30  | IGHV3-74     | ENSEMBL |
| TC11000956.hg.1          | 1.2 | 7.97 | 4.44 | 1.80E-05 | 6.40E-04 | 2.67  | TC11000956. chr11            | + | 102188181 | 102210135 | 160 | BIRC3        | RefSeq  |
| TC01001339.hg.1          | 1.2 | 6.33 | 5    | 1.74E-06 | 1.53E-04 | 4.84  | TC01001339. chr1             | + | 158259563 | 158264564 | 120 | CD1C         | RefSeq  |
| TC01001022.hg.1          | 1.2 | 8.36 | 4.39 | 2.25E-05 | 7.41E-04 | 2.47  | TC01001022. chr1             | + | 117297007 | 117311851 | 90  | CD2          | RefSeq  |
| TC15000060.hg.1          | 1.2 | 6.79 | 2.83 | 5.28E-03 | 4.14E-02 | -2.49 | TC15000060. chr15            | + | 25325288  | 25325381  | 30  | SNORD116-14  | RefSeq  |
| TC08000023.hg.1          | 1.2 | 5.97 | 4.34 | 2.75E-05 | 8.49E-04 | 2.28  | TC08000023. chr8             | + | 6602685   | 6602765   | 30  | MIR4659A     | RefSeq  |
| TC02002827.hg.1          | 1.2 | 9.22 | 5.27 | 5.25E-07 | 7.99E-05 | 5.96  | TC02002827. chr2             | - | 225629807 | 225907330 | 718 | DOCK10       | RefSeq  |
| TC16001860.hg.1          | 1.2 | 7.99 | 2.94 | 3.83E-03 | 3.27E-02 | -2.21 | TC16001860. chr16            | - | 33647308  | 33661699  | 30  |              | Broad   |
| TC15000050.hg.1          | 1.2 | 6.97 | 3.63 | 3.96E-04 | 5.90E-03 | -0.17 | TC15000050. chr15            | + | 25302006  | 25302102  | 30  | SNORD116-3   | RefSeq  |
| TC15000055.hg.1          | 1.2 | 6.97 | 3.63 | 3.96E-04 | 5.90E-03 | -0.17 | TC15000055. chr15            | + | 25318253  | 25318349  | 30  | SNORD116-3   | RefSeq  |
| TC01003403.hg.1          | 1.2 | 8.79 | 4.45 | 1.78E-05 | 6.37E-04 | 2.68  | TC01003403. chr1             | - | 160454820 | 160493052 | 155 | SLAMF6       | RefSeq  |
| TC05000227.hg.1          | 1.2 | 7.01 | 2.78 | 6.15E-03 | 4.66E-02 | -2.63 | TC05000227. chr5             | + | 54320081  | 54330398  | 83  | GZMK         | RefSeq  |
| TC11001707.hg.1          | 1.2 | 3.31 | 3.5  | 6.19E-04 | 8.19E-03 | -0.58 | TC11001707. chr11            | - | 45743090  | 45743119  | 6   |              | GenBank |
| TC09002409.hg.1          | 1.2 | 5.35 | 4.47 | 1.60E-05 | 5.91E-04 | 2.78  | TC09002409. chr9             | - | 14606167  | 14609996  | 30  |              | NONCODE |
| TC16000158.hg.1          | 1.2 | 8.53 | 5.24 | 6.02E-07 | 8.49E-05 | 5.83  | TC16000158. chr16            | + | 10971039  | 11023624  | 260 | CITA         | RefSeq  |
| TC15000063.hg.1          | 1.2 | 8.72 | 3.19 | 1.78E-03 | 1.82E-02 | -1.53 | TC15000063. chr15            | + | 25328734  | 25328827  | 30  | SNORD116-19  | RefSeq  |
| TC01005699.hg.1          | 1.2 | 8.61 | 4.62 | 8.64E-06 | 3.92E-04 | 3.35  | TC01005699. chr1             | - | 111197952 | 111199662 | 30  |              | NONCODE |
| TC10000060.hg.1          | 1.2 | 6.22 | 3.09 | 2.42E-03 | 2.31E-02 | -1.8  | TC10000060. chr10            | + | 6660678   | 6667308   | 36  | LOC101928150 | ENSEMBL |
| TC14002247.hg.1          | 1.2 | 6.97 | 2.74 | 7.01E-03 | 5.12E-02 | -2.74 | TC14002247. chr14            | - | 106518400 | 106518932 | 30  | IGHV3-7      | ENSEMBL |
| TC6_mcf_hap5000076.hg.1  | 1.2 | 8.24 | 3.31 | 1.20E-03 | 1.35E-02 | -1.17 | TC6_mcf_hap5 chr6_mcf_hap5   | + | 3934836   | 3955581   | 123 | HLA-DQA1     | GenBank |
| TC6_mann_hap4000170.hg.1 | 1.2 | 9.15 | 4.14 | 6.05E-05 | 1.47E-03 | 1.55  | TC6_mann_hap4 chr6_mann_hap4 | - | 4489886   | 4506101   | 230 | HLA-DPA1     | RefSeq  |
| TC6_qbl_hap6000190.hg.1  | 1.2 | 9.15 | 4.14 | 6.05E-05 | 1.47E-03 | 1.55  | TC6_qbl_hap6 chr6_qbl_hap6   | - | 4264797   | 4281012   | 230 | HLA-DPA1     | RefSeq  |
| TC12001392.hg.1          | 1.2 | 6.81 | 4.34 | 2.70E-05 | 8.40E-04 | 2.3   | TC12001392. chr12            | - | 39943835  | 40013843  | 140 | ABCD2        | RefSeq  |
| TC09002474.hg.1          | 1.2 | 7.31 | 4.54 | 1.19E-05 | 4.86E-04 | 3.05  | TC09002474. chr9             | - | 36840556  | 37026572  | 63  | PAX5         | NONCODE |
| TC01000834.hg.1          | 1.2 | 4.7  | 2.72 | 7.44E-03 | 5.37E-02 | -2.79 | TC01000834. chr1             | + | 89726265  | 89735437  | 30  | RP4-620F22.2 | Havana  |
| TC15000024.hg.1          | 1.2 | 6.35 | 2.94 | 3.91E-03 | 3.31E-02 | -2.23 | TC15000024. chr15            | + | 22711945  | 22711970  | 2   |              | GenBank |
| TC15000148.hg.1          | 1.2 | 6.35 | 2.94 | 3.91E-03 | 3.31E-02 | -2.23 | TC15000148. chr15            | + | 28953531  | 28953556  | 2   |              | GenBank |
| TC15000207.hg.1          | 1.2 | 6.35 | 2.94 | 3.91E-03 | 3.31E-02 | -2.23 | TC15000207. chr15            | + | 32691459  | 32691484  | 2   |              | GenBank |
| TC15000238.hg.1          | 1.2 | 6.35 | 2.94 | 3.91E-03 | 3.31E-02 | -2.23 | TC15000238. chr15            | + | 34677951  | 34677976  | 2   |              | GenBank |
| TC15000243.hg.1          | 1.2 | 6.35 | 2.94 | 3.91E-03 | 3.31E-02 | -2.23 | TC15000243. chr15            | + | 34824172  | 34824197  | 2   |              | GenBank |
| TC15001014.hg.1          | 1.2 | 6.35 | 2.94 | 3.91E-03 | 3.31E-02 | -2.23 | TC15001014. chr15            | - | 20771430  | 20771455  | 2   |              | GenBank |
| TC15001053.hg.1          | 1.2 | 6.35 | 2.94 | 3.91E-03 | 3.31E-02 | -2.23 | TC15001053. chr15            | - | 23259259  | 23259284  | 2   |              | GenBank |
| TC15001115.hg.1          | 1.2 | 6.35 | 2.94 | 3.91E-03 | 3.31E-02 | -2.23 | TC15001115. chr15            | - | 30379164  | 30379189  | 2   |              | GenBank |
| TC15001129.hg.1          | 1.2 | 6.35 | 2.94 | 3.91E-03 | 3.31E-02 | -2.23 | TC15001129. chr15            | - | 30431264  | 30431289  | 2   |              | GenBank |
| TC15001157.hg.1          | 1.2 | 6.35 | 2.94 | 3.91E-03 | 3.31E-02 | -2.23 | TC15001157. chr15            | - | 31087687  | 31087712  | 2   |              | GenBank |
| TC15001673.hg.1          | 1.2 | 6.35 | 2.94 | 3.91E-03 | 3.31E-02 | -2.23 | TC15001673. chr15            | - | 76072677  | 76072702  | 2   |              | GenBank |
| TC6_cox_hap2000202.hg.1  | 1.2 | 9.3  | 4.13 | 6.35E-05 | 1.52E-03 | 1.51  | TC6_cox_hap2 chr6_cox_hap2   | - | 4476526   | 4492734   | 219 | HLA-DPA1     | RefSeq  |
| TC6_apd_hap1000107.hg.1  | 1.2 | 9.19 | 4.19 | 4.97E-05 | 1.29E-03 | 1.73  | TC6_apd_hap1 chr6_apd_hap1   | - | 4319165   | 4335362   | 230 | HLA-DPA1     | RefSeq  |
| TC6_mcf_hap5000177.hg.1  | 1.2 | 9.19 | 4.19 | 4.97E-05 | 1.29E-03 | 1.73  | TC6_mcf_hap5 chr6_mcf_hap5   | - | 4369219   | 4385416   | 230 | HLA-DPA1     | RefSeq  |
| TC15002209.hg.1          | 1.2 | 7.12 | 4.48 | 1.56E-05 | 5.82E-04 | 2.8   | TC15002209. chr15            | + | 57592039  | 57600717  | 268 |              | NONCODE |
| TC02004912.hg.1          | 1.2 | 7.85 | 3.33 | 1.12E-03 | 1.28E-02 | -1.11 | TC02004912. chr2             | - | 242961960 | 242968327 | 40  |              | Broad   |
| TC06001578.hg.1          | 1.2 | 9.19 | 4.19 | 5.02E-05 | 1.30E-03 | 1.72  | TC06001578. chr6             | - | 33032346  | 33048555  | 230 | HLA-DPA1     | RefSeq  |
| TC6_dbb_hap3000188.hg.1  | 1.2 | 9.19 | 4.19 | 5.02E-05 | 1.30E-03 | 1.72  | TC6_dbb_hap3 chr6_dbb_hap3   | - | 4313685   | 4329894   | 230 | HLA-DPA1     | RefSeq  |
| TC6_ssto_hap7000172.hg.1 | 1.2 | 9.21 | 4.2  | 4.74E-05 | 1.25E-03 | 1.78  | TC6_ssto_hap7 chr6_ssto_hap7 | - | 4512850   | 4529059   | 226 | HLA-DPA1     | RefSeq  |

|                          |     |      |      |          |          |       |                              |   |           |           |     |              |         |
|--------------------------|-----|------|------|----------|----------|-------|------------------------------|---|-----------|-----------|-----|--------------|---------|
| TC02001199.hg.1          | 1.2 | 8.18 | 4.71 | 6.00E-06 | 3.14E-04 | 3.69  | TC02001199. chr2             | + | 204571198 | 204603636 | 160 | CD28         | RefSeq  |
| TC0X000337.hg.1          | 1.2 | 4.83 | 3.79 | 2.21E-04 | 3.82E-03 | 0.36  | TC0X000337. chrX             | + | 56100757  | 56102014  | 30  |              | ENSEMBL |
| TC02004860.hg.1          | 1.2 | 8.68 | 5.05 | 1.40E-06 | 1.35E-04 | 5.05  | TC02004860. chr2             | - | 235401690 | 235403788 | 30  |              | NONCODE |
| TC14000123.hg.1          | 1.2 | 8.75 | 3.87 | 1.70E-04 | 3.16E-03 | 0.6   | TC14000123. chr14            | + | 22971215  | 22971276  | 30  | TRAJ38       | ENSEMBL |
| TC18000555.hg.1          | 1.2 | 6.21 | 3.49 | 6.40E-04 | 8.40E-03 | -0.61 | TC18000555. chr18            | - | 60861822  | 60861898  | 30  |              | ENSEMBL |
| TC07000918.hg.1          | 1.2 | 9.03 | 3.44 | 7.80E-04 | 9.77E-03 | -0.78 | TC07000918. chr7             | + | 142448391 | 142448743 | 30  |              | UCSC    |
| TC01002849.hg.1          | 1.2 | 8.53 | 2.92 | 4.14E-03 | 3.45E-02 | -2.28 | TC01002849. chr1             | - | 89646831  | 89664633  | 175 | GBP4         | RefSeq  |
| TC14002250.hg.1          | 1.2 | 7.18 | 2.87 | 4.71E-03 | 3.80E-02 | -2.39 | TC14002250. chr14            | - | 106573233 | 106573800 | 30  | LOC100293211 | ENSEMBL |
| TC19001116.hg.1          | 1.2 | 8.1  | 4.11 | 6.76E-05 | 1.59E-03 | 1.45  | TC19001116. chr19            | - | 7753643   | 7767032   | 150 | FCER2        | RefSeq  |
| TC03000549.hg.1          | 1.2 | 6.5  | 5.13 | 9.61E-07 | 1.10E-04 | 5.4   | TC03000549. chr3             | + | 108541545 | 108573852 | 120 | TRAT1        | RefSeq  |
| TC6_dbb_hap3000181.hg.1  | 1.2 | 8.1  | 4.75 | 5.10E-06 | 2.87E-04 | 3.84  | TC6_dbb_hap3 chr6_dbb_hap3   | - | 3905881   | 3915822   | 105 | HLA-DQB1     | GenBank |
| TC05003035.hg.1          | 1.2 | 7.75 | 4.22 | 4.38E-05 | 1.18E-03 | 1.85  | TC05003035. chr5             | - | 66478116  | 66492612  | 60  | CD180        | NONCODE |
| TC15002019.hg.1          | 1.2 | 6.24 | 3.32 | 1.17E-03 | 1.32E-02 | -1.15 | TC15002019. chr15            | - | 102293649 | 102293678 | 6   |              | GenBank |
| TC15002022.hg.1          | 1.2 | 6.24 | 3.32 | 1.17E-03 | 1.32E-02 | -1.15 | TC15002022. chr15            | - | 102293993 | 102294022 | 6   |              | GenBank |
| TC15002026.hg.1          | 1.2 | 6.24 | 3.32 | 1.17E-03 | 1.32E-02 | -1.15 | TC15002026. chr15            | - | 102294519 | 102294548 | 6   |              | GenBank |
| TC15002036.hg.1          | 1.2 | 6.24 | 3.32 | 1.17E-03 | 1.32E-02 | -1.15 | TC15002036. chr15            | - | 102296006 | 102296035 | 6   |              | GenBank |
| TC15002039.hg.1          | 1.2 | 6.24 | 3.32 | 1.17E-03 | 1.32E-02 | -1.15 | TC15002039. chr15            | - | 102296341 | 102296370 | 6   |              | GenBank |
| TC15002041.hg.1          | 1.2 | 6.24 | 3.32 | 1.17E-03 | 1.32E-02 | -1.15 | TC15002041. chr15            | - | 102296958 | 102296987 | 6   |              | GenBank |
| TC15002044.hg.1          | 1.2 | 6.24 | 3.32 | 1.17E-03 | 1.32E-02 | -1.15 | TC15002044. chr15            | - | 102297484 | 102297513 | 6   |              | GenBank |
| TC15002047.hg.1          | 1.2 | 6.24 | 3.32 | 1.17E-03 | 1.32E-02 | -1.15 | TC15002047. chr15            | - | 102298348 | 102298377 | 6   |              | GenBank |
| TC15002050.hg.1          | 1.2 | 6.24 | 3.32 | 1.17E-03 | 1.32E-02 | -1.15 | TC15002050. chr15            | - | 102299219 | 102299248 | 6   |              | GenBank |
| TC15002051.hg.1          | 1.2 | 6.24 | 3.32 | 1.17E-03 | 1.32E-02 | -1.15 | TC15002051. chr15            | - | 102299836 | 102299865 | 6   |              | GenBank |
| TC01003404.hg.1          | 1.2 | 6.33 | 4.12 | 6.52E-05 | 1.54E-03 | 1.48  | TC01003404. chr1             | - | 160473166 | 160473246 | 30  |              | ENSEMBL |
| TC6_ssto_hap7000165.hg.1 | 1.2 | 8.05 | 4.57 | 1.08E-05 | 4.54E-04 | 3.15  | TC6_ssto_hap7 chr6_ssto_hap7 | - | 4055996   | 4063243   | 76  | HLA-DQB1     | GenBank |
| TC02001886.hg.1          | 1.2 | 6.77 | 4.26 | 3.72E-05 | 1.04E-03 | 2     | TC02001886. chr2             | - | 60751624  | 60755350  | 30  |              | GenBank |
| TC03002724.hg.1          | 1.2 | 4.79 | 4.78 | 4.54E-06 | 2.69E-04 | 3.95  | TC03002724. chr3             | + | 191113180 | 191116458 | 30  | CCDC50       | NONCODE |
| TC02004397.hg.1          | 1.2 | 8.88 | 2.9  | 4.36E-03 | 3.59E-02 | -2.32 | TC02004397. chr2             | - | 89416834  | 89417284  | 22  |              | NONCODE |
| TC16001512.hg.1          | 1.2 | 6.42 | 2.93 | 4.01E-03 | 3.38E-02 | -2.25 | TC16001512. chr16            | + | 32926412  | 32926831  | 20  |              | Broad   |
| TC02002962.hg.1          | 1.2 | 8.02 | 3.56 | 5.06E-04 | 7.03E-03 | -0.39 | TC02002962. chr2             | - | 242967334 | 242968327 | 30  | AC093642.4   | Havana  |
| TC01003366.hg.1          | 1.2 | 6    | 4.1  | 7.16E-05 | 1.66E-03 | 1.4   | TC01003366. chr1             | - | 157715521 | 157746922 | 189 | FCRL2        | RefSeq  |
| TC17001455.hg.1          | 1.2 | 8.79 | 5.25 | 5.65E-07 | 8.19E-05 | 5.89  | TC17001455. chr17            | - | 37913968  | 38020441  | 126 | IKZF3        | RefSeq  |
| TC12000599.hg.1          | 1.2 | 6.03 | 4.24 | 4.01E-05 | 1.10E-03 | 1.93  | TC12000599. chr12            | + | 68383225  | 68415107  | 40  | IFNG-AS1     | ENSEMBL |
| TC02000850.hg.1          | 1.2 | 7.43 | 4.12 | 6.43E-05 | 1.53E-03 | 1.49  | TC02000850. chr2             | + | 132143133 | 132143204 | 30  |              | UCSC    |
| TC03002723.hg.1          | 1.2 | 5.12 | 5.27 | 5.05E-07 | 7.73E-05 | 6     | TC03002723. chr3             | + | 191089936 | 191090896 | 30  |              | NONCODE |
| TC13001576.hg.1          | 1.2 | 6.98 | 4.13 | 6.22E-05 | 1.50E-03 | 1.53  | TC13001576. chr13            | - | 74700603  | 74702042  | 30  |              | NONCODE |
| TC14002191.hg.1          | 1.2 | 6.69 | 3.32 | 1.16E-03 | 1.32E-02 | -1.14 | TC14002191. chr14            | + | 22918107  | 22934912  | 140 | TRDJ1        | ENSEMBL |
| TC14002265.hg.1          | 1.2 | 8.48 | 3.1  | 2.36E-03 | 2.26E-02 | -1.78 | TC14002265. chr14            | - | 106845323 | 106845789 | 47  | IGHV3-35     | ENSEMBL |
| TC12002850.hg.1          | 1.3 | 7.26 | 5.03 | 1.48E-06 | 1.39E-04 | 4.99  | TC12002850. chr12            | - | 46581574  | 46581823  | 30  | SLC38A1      | NONCODE |
| TC04000524.hg.1          | 1.3 | 6.88 | 5.12 | 1.01E-06 | 1.13E-04 | 5.35  | TC04000524. chr4             | + | 102332443 | 102995969 | 318 | BANK1        | RefSeq  |
| TC14002143.hg.1          | 1.3 | 7    | 3.84 | 1.90E-04 | 3.43E-03 | 0.5   | TC14002143. chr14            | - | 96176396  | 96176829  | 30  |              | NONCODE |
| TC03000633.hg.1          | 1.3 | 8.04 | 4.6  | 9.54E-06 | 4.18E-04 | 3.26  | TC03000633. chr3             | + | 122296449 | 122357894 | 243 | PARP15       | RefSeq  |
| TC22001005.hg.1          | 1.3 | 8.74 | 3.3  | 1.24E-03 | 1.39E-02 | -1.2  | TC22001005. chr22            | + | 22735428  | 23247213  | 35  |              | NONCODE |
| TC16000388.hg.1          | 1.3 | 9.68 | 2.9  | 4.33E-03 | 3.57E-02 | -2.32 | TC16000388. chr16            | + | 32077386  | 32077674  | 30  | IGHV3OR16-9  | ENSEMBL |
| TC05001419.hg.1          | 1.3 | 7.6  | 4.37 | 2.45E-05 | 7.82E-04 | 2.38  | TC05001419. chr5             | - | 66478103  | 66492627  | 70  | CD180        | RefSeq  |
| TC15001710.hg.1          | 1.3 | 9.88 | 3.65 | 3.73E-04 | 5.64E-03 | -0.12 | TC15001710. chr15            | - | 79042403  | 79042433  | 7   |              | GenBank |
| TC03001649.hg.1          | 1.3 | 7.1  | 5.27 | 5.06E-07 | 7.73E-05 | 6     | TC03001649. chr3             | - | 112182813 | 112218408 | 100 | BTLA         | RefSeq  |
| TC15002028.hg.1          | 1.3 | 6.22 | 3.59 | 4.61E-04 | 6.57E-03 | -0.31 | TC15002028. chr15            | - | 102294739 | 102294770 | 8   |              | GenBank |
| TC15002031.hg.1          | 1.3 | 6.22 | 3.59 | 4.61E-04 | 6.57E-03 | -0.31 | TC15002031. chr15            | - | 102295174 | 102295205 | 8   |              | GenBank |



|                          |     |       |      |          |          |       |                            |   |           |           |     |                      |
|--------------------------|-----|-------|------|----------|----------|-------|----------------------------|---|-----------|-----------|-----|----------------------|
| TC15002034.hg.1          | 1.3 | 6.22  | 3.59 | 4.61E-04 | 6.57E-03 | -0.31 | TC15002034. chr15          | - | 102295700 | 102295731 | 8   | GenBank              |
| TC15002043.hg.1          | 1.3 | 6.22  | 3.59 | 4.61E-04 | 6.57E-03 | -0.31 | TC15002043. chr15          | - | 102297178 | 102297209 | 8   | GenBank              |
| TC15002046.hg.1          | 1.3 | 6.22  | 3.59 | 4.61E-04 | 6.57E-03 | -0.31 | TC15002046. chr15          | - | 102297698 | 102297729 | 8   | GenBank              |
| TC15002049.hg.1          | 1.3 | 6.22  | 3.59 | 4.61E-04 | 6.57E-03 | -0.31 | TC15002049. chr15          | - | 102298569 | 102298600 | 8   | GenBank              |
| TC02004258.hg.1          | 1.3 | 6.74  | 4.27 | 3.67E-05 | 1.03E-03 | 2.01  | TC02004258. chr2           | - | 60751633  | 60755350  | 30  | NONCODE              |
| TC10001555.hg.1          | 1.3 | 6.86  | 5.82 | 4.04E-08 | 1.98E-05 | 8.37  | TC10001555. chr10          | - | 97951455  | 98031333  | 280 | BLNK RefSeq          |
| TC14002274.hg.1          | 1.3 | 7.62  | 3.67 | 3.42E-04 | 5.27E-03 | -0.04 | TC14002274. chr14          | - | 107048672 | 107049341 | 30  | IGHV3-53 ENSEMBL     |
| TC14002256.hg.1          | 1.3 | 7.08  | 3.94 | 1.32E-04 | 2.60E-03 | 0.84  | TC14002256. chr14          | - | 106691673 | 106692203 | 20  | IGHV3-21 ENSEMBL     |
| TC16000385.hg.1          | 1.3 | 10.41 | 3.01 | 3.11E-03 | 2.79E-02 | -2.02 | TC16000385. chr16          | + | 31973409  | 31985682  | 30  | ENSEMBL              |
| TC09001627.hg.1          | 1.3 | 5.92  | 2.85 | 5.03E-03 | 3.99E-02 | -2.45 | TC09001627. chr9           | - | 131012390 | 131012416 | 3   | GenBank              |
| TC14002252.hg.1          | 1.3 | 7.68  | 2.79 | 6.09E-03 | 4.62E-02 | -2.62 | TC14002252. chr14          | - | 106610313 | 106610852 | 30  | IGHV3-15 ENSEMBL     |
| TC01003367.hg.1          | 1.3 | 7.91  | 3.8  | 2.15E-04 | 3.75E-03 | 0.39  | TC01003367. chr1           | - | 157764193 | 157789940 | 226 | FCRL1 RefSeq         |
| TC12002432.hg.1          | 1.3 | 6.07  | 4.9  | 2.71E-06 | 1.98E-04 | 4.43  | TC12002432. chr12          | + | 68383225  | 68628466  | 150 | IFNG-AS1 NONCODE     |
| TC13000829.hg.1          | 1.3 | 8.35  | 4.75 | 5.13E-06 | 2.89E-04 | 3.84  | TC13000829. chr13          | - | 99946784  | 99959749  | 40  | GPR183 RefSeq        |
| TC14002272.hg.1          | 1.3 | 6.71  | 3.38 | 9.41E-04 | 1.13E-02 | -0.95 | TC14002272. chr14          | - | 107012938 | 107013477 | 35  | IGHV3-49 ENSEMBL     |
| TC14002282.hg.1          | 1.3 | 6.17  | 2.76 | 6.50E-03 | 4.85E-02 | -2.68 | TC14002282. chr14          | - | 107198932 | 107199471 | 20  | IGHV3-72 ENSEMBL     |
| TC14002228.hg.1          | 1.3 | 6.08  | 3.16 | 1.92E-03 | 1.93E-02 | -1.59 | TC14002228. chr14          | - | 106361492 | 106361528 | 8   | IGHD3-16 ENSEMBL     |
| TC16001518.hg.1          | 1.3 | 8.17  | 3.04 | 2.86E-03 | 2.63E-02 | -1.95 | TC16001518. chr16          | + | 33629698  | 33630084  | 17  | Broad                |
| TC14002263.hg.1          | 1.3 | 9.55  | 3.55 | 5.21E-04 | 7.18E-03 | -0.42 | TC14002263. chr14          | - | 106815722 | 106816253 | 30  | EPC1 ENSEMBL         |
| TC12001202.hg.1          | 1.3 | 8     | 4.83 | 3.57E-06 | 2.35E-04 | 4.17  | TC12001202. chr12          | - | 9747147   | 9760497   | 70  | KLRB1 RefSeq         |
| TCOM000019.hg.1          | 1.3 | 8.51  | 3.64 | 3.83E-04 | 5.75E-03 | -0.14 | TCOM000019. chrM           | - | 15960     | 16024     | 30  | GenBank              |
| TC17001269.hg.1          | 1.3 | 5.43  | 4.31 | 3.15E-05 | 9.31E-04 | 2.15  | TC17001269. chr17          | - | 22026337  | 22026405  | 30  | GenBank              |
| TC14002255.hg.1          | 1.3 | 6.04  | 2.88 | 4.62E-03 | 3.74E-02 | -2.38 | TC14002255. chr14          | - | 106667581 | 106668095 | 23  | IGHV3-20 ENSEMBL     |
| TC16000387.hg.1          | 1.3 | 8.52  | 2.75 | 6.73E-03 | 4.98E-02 | -2.71 | TC16000387. chr16          | + | 32070548  | 32070635  | 30  | UCSC                 |
| TC14002279.hg.1          | 1.3 | 7.68  | 3.36 | 9.94E-04 | 1.17E-02 | -1    | TC14002279. chr14          | - | 107131033 | 107131560 | 30  | IGHV3-66 ENSEMBL     |
| TC22001009.hg.1          | 1.3 | 9.18  | 2.75 | 6.81E-03 | 5.01E-02 | -2.72 | TC22001009. chr22          | + | 23261707  | 23262023  | 30  | NONCODE              |
| TC02004432.hg.1          | 1.3 | 3.9   | 3.84 | 1.85E-04 | 3.36E-03 | 0.52  | TC02004432. chr2           | - | 100705115 | 100705776 | 30  | AC092168.4 NONCODE   |
| TC02003402.hg.1          | 1.3 | 7.9   | 2.84 | 5.18E-03 | 4.08E-02 | -2.48 | TC02003402. chr2           | + | 90198907  | 90199183  | 30  | NONCODE              |
| TC04000362.hg.1          | 1.3 | 6.01  | 5.21 | 6.75E-07 | 9.09E-05 | 5.73  | TC04000362. chr4           | + | 68424446  | 68473055  | 120 | STAP1 RefSeq         |
| TC19002611.hg.1          | 1.3 | 8.63  | 4.79 | 4.35E-06 | 2.63E-04 | 3.99  | TC19002611. chr19          | + | 35820072  | 35838264  | 190 | CD22 RefSeq          |
| TC16000396.hg.1          | 1.3 | 8.92  | 3.28 | 1.33E-03 | 1.47E-02 | -1.27 | TC16000396. chr16          | + | 33006369  | 33006839  | 30  | IGHV3OR16-10 ENSEMBL |
| TC14002213.hg.1          | 1.3 | 9.76  | 4.43 | 1.90E-05 | 6.62E-04 | 2.62  | TC14002213. chr14          | - | 106320349 | 106322323 | 50  | IGHM ENSEMBL         |
| TC14002268.hg.1          | 1.3 | 7.55  | 3.14 | 2.05E-03 | 2.03E-02 | -1.65 | TC14002268. chr14          | - | 106926188 | 106926724 | 30  | IGHV3-43 ENSEMBL     |
| TC6_ssto_hap7000077.hg.1 | 1.3 | 8.74  | 2.8  | 5.84E-03 | 4.49E-02 | -2.58 | TC6_ssto_ha chr6_ssto_hap7 | + | 4038586   | 4044828   | 63  | HLA-DQA1 GenBank     |
| TC05003326.hg.1          | 1.3 | 4.69  | 4.82 | 3.69E-06 | 2.40E-04 | 4.14  | TC05003326. chr5           | - | 158470618 | 158472793 | 30  | NONCODE              |
| TC14002261.hg.1          | 1.3 | 8.64  | 3.26 | 1.42E-03 | 1.54E-02 | -1.32 | TC14002261. chr14          | - | 106791005 | 106791536 | 40  | IGHV3-30 ENSEMBL     |
| TC19000588.hg.1          | 1.3 | 9.03  | 4.79 | 4.25E-06 | 2.60E-04 | 4.01  | TC19000588. chr19          | + | 42381190  | 42385439  | 80  | CD79A RefSeq         |
| TC22001449.hg.1          | 1.3 | 9.39  | 2.75 | 6.81E-03 | 5.02E-02 | -2.72 | TC22001449. chr22          | + | 23264765  | 23265085  | 10  | IgL7 ENSEMBL         |
| TC14002257.hg.1          | 1.3 | 8.58  | 2.84 | 5.13E-03 | 4.06E-02 | -2.47 | TC14002257. chr14          | - | 106725201 | 106725733 | 30  | IGHV3-23 ENSEMBL     |
| TC01002064.hg.1          | 1.3 | 8.32  | 3.67 | 3.48E-04 | 5.35E-03 | -0.05 | TC01002064. chr1           | - | 566187    | 566265    | 29  | ENSEMBL              |
| TC22000467.hg.1          | 1.4 | 9     | 2.74 | 6.91E-03 | 5.08E-02 | -2.73 | TC22000467. chr22          | - | 17385315  | 17385395  | 30  | UCSC                 |
| TC14002234.hg.1          | 1.4 | 5.88  | 3.32 | 1.14E-03 | 1.31E-02 | -1.13 | TC14002234. chr14          | - | 106370355 | 106370385 | 6   | IGHD3-10 ENSEMBL     |
| TC14002214.hg.1          | 1.4 | 8.15  | 4.79 | 4.25E-06 | 2.60E-04 | 4.01  | TC14002214. chr14          | - | 106326591 | 106329064 | 60  | IGHA1 UCSC           |
| TC11000510.hg.1          | 1.4 | 8.29  | 5.26 | 5.44E-07 | 8.10E-05 | 5.93  | TC11000510. chr11          | + | 60223282  | 60238233  | 168 | MS4A1 RefSeq         |
| TC14002241.hg.1          | 1.5 | 4.07  | 3.15 | 1.99E-03 | 1.99E-02 | -1.63 | TC14002241. chr14          | - | 106382685 | 106382715 | 6   | IGHD2-2 ENSEMBL      |
| TC14002240.hg.1          | 1.5 | 5.49  | 3.47 | 7.03E-04 | 9.02E-03 | -0.69 | TC14002240. chr14          | - | 106380218 | 106380248 | 6   | IGHD3-3 ENSEMBL      |
