# Supplementary material for: Transcriptome-wide study of TNF-inhibitor therapy in rheumatoid arthritis reveals early signature of successful treatment
Source: PubMed Central journal article supplement (PMC7948368; doi:10.1186/s13075-021-02451-9), 2021-03-10
Supplement: 13075_2021_2451_MOESM2_ESM.pdf [file 13075_2021_2451_MOESM2_ESM.pdf]

| Ingenuity Canonical Pathways                                                   | -LOG(p-value) | Ratio  | Molecules                                                                                                 |
|--------------------------------------------------------------------------------|---------------|--------|-----------------------------------------------------------------------------------------------------------|
| Altered T Cell and B Cell Signaling in Rheumatoid Arthritis                    | 9.85          | 0.173  | TLR2,CD28,TLR4,CD40LG,HLA-DOA,HLA-DRB1,TLR5,TLR6,TLR8,HLA-DQA1,HLA-DOB,IL1B,CD79A,HLA-DQB1                |
| TREM1 Signaling                                                                | 9.6           | 0.186  | TREM1,ICAM1,CIITA,TLR8,TLR2,TLR4,TLR5,NLRP12,PLCG2,TLR6,IL1B,NLRC4,ITGAX                                  |
| Dendritic Cell Maturation                                                      | 7.25          | 0.0947 | HLA-DOA,CD40LG,ICAM1,HLA-DQA1,CD58,IGHG1,HLA-DQB1,CREB5,TLR2,TLR4,MAPK14,HLA-DRB1,PLCG2,IL1B,HLA-DOB,CD1C |
| Allograft Rejection Signaling                                                  | 6.86          | 0.188  | CD28,HLA-DOA,CD40LG,HLA-DRB1,HLA-DQA1,HLA-DOB,IGHG1,HLA-DQB1,HLA-DPA1                                     |
| Communication between Innate and Adaptive Immune Cells                         | 6.69          | 0.134  | TLR2,CD28,TLR4,CD40LG,HLA-DRB1,TLR5,TLR6,TLR8,IL1B,IGHA1,IGHG1                                            |
| Nur77 Signaling in T Lymphocytes                                               | 6.62          | 0.176  | CD3G,CD28,HLA-DOA,HLA-DRB1,HLA-DQA1,HLA-DOB,HLA-DQB1,BCL2,MAP3K2                                          |
| phagosome formation                                                            | 6.6           | 0.118  | TLR2,FCAR,MARCKS,TLR4,TLR5,PLCG2,TLR6,FCER1A,TLR8,IGHG1,ITGA4,FCER2                                       |
| iCOS-iCOSL Signaling in T Helper Cells                                         | 6.55          | 0.117  | CD3G,GAB2,CD28,HLA-DOA,CD40LG,HLA-DRB1,TRAT1,HLA-DQA1,HLA-DOB,HLA-DQB1,ITK,PTEN                           |
| B Cell Development                                                             | 6.48          | 0.259  | HLA-DOA,HLA-DRB1,IGH,HLA-DQA1,HLA-DOB,CD79A,HLA-DQB1                                                      |
| B Cell Receptor Signaling                                                      | 6.4           | 0.0877 | ETS1,BLNK,GAB2,SOS2,CD79A,IGHG1,BCL6,CREB5,PTEN,PAX5,MAPK14,PLCG2,CD22,BCL2A1,MAP3K2                      |
| OX40 Signaling Pathway                                                         | 6.4           | 0.167  | CD3G,HLA-DOA,HLA-DRB1,HLA-DQA1,HLA-DOB,TRAF5,HLA-DQB1,HLA-DPA1,BCL2                                       |
| Autoimmune Thyroid Disease Signaling                                           | 6.21          | 0.19   | CD28,HLA-DOA,CD40LG,HLA-DRB1,HLA-DQA1,HLA-DOB,IGHG1,HLA-DQB1                                              |
| NF- $\kappa$ B Signaling                                                       | 5.71          | 0.0828 | CD40LG,TLR8,IRAK3,IL1R1,IGF2R,TLR2,IL1R2,TLR4,TLR5,PLCG2,TLR6,IGF1R,IL1B,TRAF5                            |
| Type I Diabetes Mellitus Signaling                                             | 5.55          | 0.104  | CD3G,CD28,HLA-DOA,HLA-DRB1,MAPK14,HLA-DQA1,HLA-DOB,IL1B,HLA-DQB1,IL1R1,BCL2                               |
| Toll-like Receptor Signaling                                                   | 5.26          | 0.123  | TLR2,TLR4,LY96,MAPK14,TLR5,TLR6,TLR8,IL1B,IRAK3                                                           |
| Granulocyte Adhesion and Diapedesis                                            | 5.11          | 0.0788 | IL1R2,HRH2,ICAM1,C5AR1,MMP8,FPR2,IL1B,IL1R1,MMP25,MMP9,ITGA4,IL18RAP,FPR1                                 |
| Role of NFAT in Regulation of the Immune Response                              | 5.08          | 0.0783 | BLNK,CD28,CD3G,HLA-DOA,HLA-DRB1,PLCG2,SOS2,FCER1A,HLA-DQA1,HLA-DOB,CD79A,HLA-DQB1,ITK                     |
| Primary Immunodeficiency Signaling                                             | 4.95          | 0.159  | BLNK,CD40LG,IGH,CIITA,CD79A,IGHA1,IGHG1                                                                   |
| Graft-versus-Host Disease Signaling                                            | 4.95          | 0.159  | CD28,HLA-DOA,HLA-DRB1,HLA-DQA1,HLA-DOB,IL1B,HLA-DQB1                                                      |
| Role of Macrophages, Fibroblasts and Endothelial Cells in Rheumatoid Arthritis | 4.82          | 0.0592 | ICAM1,C5AR1,TLR8,IGHG1,IRAK3,IL1R1,CREB5,IL18RAP,TLR2,IL1R2,TLR4,MAPK14,TLR5,PLCG2,TLR6,IL1B,TRAF5        |
| Cdc42 Signaling                                                                | 4.73          | 0.0853 | CD3G,HLA-DOA,HLA-DRB1,MAPK14,HLA-DQA1,HLA-DOB,LIMK2,HLA-DQB1,HLA-DPA1,ITGA4,ITK                           |
| T Helper Cell Differentiation                                                  | 4.63          | 0.119  | CD28,HLA-DOA,CD40LG,HLA-DRB1,HLA-DQA1,HLA-DOB,HLA-DQB1,BCL6                                               |
| PKC $\zeta$ Signaling in T Lymphocytes                                         | 4.49          | 0.0885 | CD3G,CD28,HLA-DOA,HLA-DRB1,PLCG2,SOS2,HLA-DQA1,HLA-DOB,HLA-DQB1,MAP3K2                                    |
| IL-4 Signaling                                                                 | 4.4           | 0.111  | HLA-DOA,HLA-DRB1,IGH,SOS2,HLA-DQA1,HLA-DOB,HLA-DQB1,FCER2                                                 |
| Antigen Presentation Pathway                                                   | 4.37          | 0.162  | HLA-DOA,HLA-DRB1,CIITA,HLA-DQA1,HLA-DOB,HLA-DPA1                                                          |
| Role of Pattern Recognition Receptors in Recognition of Bacteria and Viruses   | 4.29          | 0.084  | TLR2,TLR4,C5AR1,OAS2,TLR5,PLCG2,TLR6,TLR8,IL1B,NLRC4                                                      |

|                                                                           |      |        |                                                                      |
|---------------------------------------------------------------------------|------|--------|----------------------------------------------------------------------|
| LXR/RXR Activation                                                        | 4.23 | 0.0826 | IL1R2,TLR4,LY96,ORM1,ORM2,IL1B,IL1R1,ABCA1,MMP9,IL18RAP              |
| Hepatic Fibrosis / Hepatic Stellate Cell Activation                       | 4.02 | 0.0663 | IL1R2,TLR4,CD40LG,LY96,ICAM1,IGF1R,IL1B,ECE1,IL1R1,MMP9,IL18RAP,BCL2 |
| Atherosclerosis Signaling                                                 | 3.52 | 0.0744 | CD40LG,ICAM1,ORM1,ORM2,IL1B,ALOX5,TNFSF14,MMP9,ITGA4                 |
| Calcium-induced T Lymphocyte Apoptosis                                    | 3.26 | 0.103  | CD3G,HLA-DOA,HLA-DRB1,HLA-DQA1,HLA-DOB,HLA-DQB1                      |
| Leukocyte Extravasation Signaling                                         | 3.17 | 0.057  | ICAM1,MAPK14,PLCG2,RASGRP1,MMP8,BMX,NCF4,MMP25,MMP9,ITGA4,ITK        |
| CD28 Signaling in T Helper Cells                                          | 3.04 | 0.0708 | CD3G,CD28,HLA-DOA,HLA-DRB1,HLA-DQA1,HLA-DOB,HLA-DQB1,ITK             |
| LPS/IL-1 Mediated Inhibition of RXR Function                              | 2.91 | 0.0529 | IL1R2,TLR4,LY96,ACOX1,IL1B,IL1R1,CHST15,SULT1B1,ABCA1,ACSL1,IL18RAP  |
| _tocopherol Degradation                                                   | 2.74 | 0.5    | CYP4F3,CYP4F2                                                        |
| CDP-diacylglycerol Biosynthesis I                                         | 2.59 | 0.188  | ABHD5,MBOAT2,GPAT3                                                   |
| Triacylglycerol Biosynthesis                                              | 2.58 | 0.121  | ABHD5,DGAT2,MBOAT2,GPAT3                                             |
| PPAR_/RXR_ Activation                                                     | 2.56 | 0.0545 | IL1R2,MAPK14,PLCG2,ACOX1,SOS2,IL1B,IL1R1,ABCA1,IL18RAP               |
| Protein Citrullination                                                    | 2.52 | 0.4    | PADI4,PADI2                                                          |
| Complement System                                                         | 2.44 | 0.111  | SERPING1,CR1,C5AR1,ITGAX                                             |
| Phosphatidylglycerol Biosynthesis II (Non-plastidic)                      | 2.43 | 0.167  | ABHD5,MBOAT2,GPAT3                                                   |
| Systemic Lupus Erythematosus Signaling                                    | 2.42 | 0.0485 | CD3G,CD28,CD40LG,PLCG2,IGH,SOS2,CD22,IL1B,CD79A,IGHG1                |
| Agranulocyte Adhesion and Diapedesis                                      | 2.39 | 0.0514 | ICAM1,C5AR1,MMP8,IL1B,CXCR1,IL1R1,MMP25,MMP9,ITGA4                   |
| IL-6 Signaling                                                            | 2.34 | 0.0603 | IL1R2,MAPK14,TNFAIP6,SOS2,IL1B,IL1R1,IL18RAP                         |
| p38 MAPK Signaling                                                        | 2.32 | 0.0598 | IL1R2,MAPK14,IL1B,IRAK3,IL1R1,CREB5,IL18RAP                          |
| Role of Osteoblasts, Osteoclasts and Chondrocytes in Rheumatoid Arthritis | 2.31 | 0.0467 | IL1R2,MAPK14,MMP8,IL1B,TRAF5,IL1R1,BIRC3,ALPL,IL18RAP,BCL2           |
| CD40 Signaling                                                            | 2.26 | 0.0781 | CD40LG,ICAM1,MAPK14,TRAF5,FCER2                                      |
| PI3K Signaling in B Lymphocytes                                           | 2.2  | 0.0569 | BLNK,TLR4,CD180,PLCG2,CD79A,IRS2,PTEN                                |
| Hematopoiesis from Pluripotent Stem Cells                                 | 2.2  | 0.0952 | CD3G,IGH,IGHA1,IGHG1                                                 |
| iNOS Signaling                                                            | 2.16 | 0.093  | TLR4,LY96,MAPK14,IRAK3                                               |
| IL-10 Signaling                                                           | 2.15 | 0.0735 | IL1R2,MAPK14,IL1B,IL1R1,IL18RAP                                      |
| T Cell Receptor Signaling                                                 | 2.14 | 0.0625 | CD3G,CD28,RASGRP1,SOS2,BMX,ITK                                       |
| Airway Pathology in Chronic Obstructive Pulmonary Disease                 | 2.09 | 0.25   | MMP8,MMP9                                                            |
| Salvage Pathways of Pyrimidine Deoxyribonucleotides                       | 2.09 | 0.25   | CDA,APOBEC3A                                                         |

|                                                                       |      |        |                                                                 |
|-----------------------------------------------------------------------|------|--------|-----------------------------------------------------------------|
| Phospholipase C Signaling                                             | 2.08 | 0.0433 | BLNK,MARCKS,CD3G,PLCG2,SOS2,CD79A,IGHG1,CREB5,ITGA4,ITK         |
| Caveolar-mediated Endocytosis Signaling                               | 2.07 | 0.0704 | FLOT2,FLOT1,ITGA4,ITGAX,MAP3K2                                  |
| Acute Phase Response Signaling                                        | 1.99 | 0.0476 | SERPING1,HP,MAPK14,ORM1,SOS2,ORM2,IL1B,IL1R1                    |
| Production of Nitric Oxide and Reactive Oxygen Species in Macrophages | 1.84 | 0.0447 | TLR2,TLR4,MAPK14,ORM1,PLCG2,ORM2,NCF4,MAP3K2                    |
| IL-8 Signaling                                                        | 1.78 | 0.0437 | ICAM1,DEFA1 (includes others),LIMK2,IRAK3,CXCR1,MMP9,ITGAX,BCL2 |
| Glycogen Degradation III                                              | 1.74 | 0.167  | PYGL,MGAM                                                       |
| PTEN Signaling                                                        | 1.73 | 0.0508 | SOS2,IGF1R,IGF2R,ITGA4,BCL2,PTEN                                |
| Tec Kinase Signaling                                                  | 1.69 | 0.0452 | TLR4,PLCG2,IGH,FCER1A,BMX,ITGA4,ITK                             |
| Crosstalk between Dendritic Cells and Natural Killer Cells            | 1.68 | 0.0562 | CD28,TLR4,CD40LG,KLRK4-KLRK1/KLRK1,HLA-DRB1                     |
| PPAR Signaling                                                        | 1.66 | 0.0556 | IL1R2,SOS2,IL1B,IL1R1,IL18RAP                                   |
| Colorectal Cancer Metastasis Signaling                                | 1.65 | 0.039  | TLR2,TLR4,TLR5,MMP8,TLR6,SOS2,TLR8,MMP25,MMP9                   |
| Hepatic Cholestasis                                                   | 1.65 | 0.0443 | IL1R2,TLR4,LY96,IL1B,IRAK3,IL1R1,IL18RAP                        |
| GM-CSF Signaling                                                      | 1.62 | 0.0645 | ETS1,CSF2RA,SOS2,BCL2A1                                         |
| Glioma Signaling                                                      | 1.54 | 0.0515 | PLCG2,SOS2,IGF1R,IGF2R,PTEN                                     |
| IL-12 Signaling and Production in Macrophages                         | 1.54 | 0.0458 | TLR2,TLR4,CD40LG,MAPK14,ORM1,ORM2                               |
| Inhibition of Matrix Metalloproteases                                 | 1.53 | 0.0789 | MMP8,MMP25,MMP9                                                 |
| Docosahexaenoic Acid (DHA) Signaling                                  | 1.5  | 0.0769 | IL1B,BCL2A1,BCL2                                                |
| HIF1_ Signaling                                                       | 1.49 | 0.05   | MAPK14,MMP8,MMP25,SLC2A3,MMP9                                   |
| Neuroprotective Role of THOP1 in Alzheimer's Disease                  | 1.48 | 0.075  | MME,ECE1,MMP9                                                   |
| Fc_RIIB Signaling in B Lymphocytes                                    | 1.45 | 0.0732 | BLNK,PLCG2,CD79A                                                |
| FLT3 Signaling in Hematopoietic Progenitor Cells                      | 1.43 | 0.0563 | GAB2,MAPK14,SOS2,CREB5                                          |
| G-Protein Coupled Receptor Signaling                                  | 1.43 | 0.0354 | HCAR3,HRH2,RGS2,RASGRP1,SOS2,FPR2,CREB5,HCAR2,FPR1              |
| HGF Signaling                                                         | 1.43 | 0.0481 | ETS1,PLCG2,SOS2,ITGA4,MAP3K2                                    |
| STAT3 Pathway                                                         | 1.39 | 0.0548 | MAPK14,IGF1R,IGF2R,BCL2                                         |
| Role of Tissue Factor in Cancer                                       | 1.38 | 0.0467 | MAPK14,PLAUR,IL1B,LIMK2,PTEN                                    |
| Fc Epsilon RI Signaling                                               | 1.37 | 0.0463 | MAPK14,PLCG2,IGH,SOS2,FCER1A                                    |
| G_s Signaling                                                         | 1.37 | 0.0463 | HCAR3,HRH2,RGS2,CREB5,HCAR2                                     |

|                                                                      |       |        |                                       |
|----------------------------------------------------------------------|-------|--------|---------------------------------------|
| D-myo-inositol (1,3,4)-trisphosphate Biosynthesis                    | 1.36  | 0.105  | IPMK,PTEN                             |
| Regulation of IL-2 Expression in Activated and Anergic T Lymphocytes | 1.31  | 0.0513 | CD3G,CD28,PLCG2,SOS2                  |
| 1D-myo-inositol Hexakisphosphate Biosynthesis V (from Ins(1,3,4)P3)  | 1.28  | 0.333  | IPMK                                  |
| Prostate Cancer Signaling                                            | 1.27  | 0.05   | SOS2,CREB5,BCL2,PTEN                  |
| HMGB1 Signaling                                                      | 1.23  | 0.0424 | TLR4,ICAM1,MAPK14,IL1B,IL1R1          |
| Melanocyte Development and Pigmentation Signaling                    | 1.21  | 0.0476 | PLCG2,SOS2,CREB5,BCL2                 |
| PI3K/AKT Signaling                                                   | 1.19  | 0.0413 | GAB2,SOS2,ITGA4,BCL2,PTEN             |
| Neuregulin Signaling                                                 | 1.18  | 0.0465 | PLCG2,SOS2,ITGA4,PTEN                 |
| FAK Signaling                                                        | 1.18  | 0.0465 | PLCG2,SOS2,ITGA4,PTEN                 |
| RANK Signaling in Osteoclasts                                        | 1.18  | 0.0465 | MAPK14,TRAF5,BIRC3,MAP3K2             |
| Superpathway of D-myo-inositol (1,4,5)-trisphosphate Metabolism      | 1.18  | 0.0833 | IPMK,PTEN                             |
| Pentose Phosphate Pathway (Oxidative Branch)                         | 1.16  | 0.25   | PGD                                   |
| Arginine Degradation I (Arginase Pathway)                            | 1.16  | 0.25   | ARG1                                  |
| NAD Biosynthesis III                                                 | 1.16  | 0.25   | NAMPT                                 |
| Acetate Conversion to Acetyl-CoA                                     | 1.16  | 0.25   | ACSL1                                 |
| Apoptosis Signaling                                                  | 1.15  | 0.0455 | PLCG2,BCL2A1,BIRC3,BCL2               |
| Thrombopoietin Signaling                                             | 1.13  | 0.0545 | GAB2,PLCG2,IRS2                       |
| Salvage Pathways of Pyrimidine Ribonucleotides                       | 1.11  | 0.044  | LIMK2,MAK,CDA,APOBEC3A                |
| Myc Mediated Apoptosis Signaling                                     | 1.08  | 0.0517 | SOS2,IGF1R,BCL2                       |
| Antioxidant Action of Vitamin C                                      | 1.06  | 0.0421 | MAPK14,CSF2RA,PLCG2,SLC2A3            |
| cAMP-mediated signaling                                              | 1.05  | 0.0324 | HCAR3,HRH2,RGS2,FPR2,CREB5,HCAR2,FPR1 |
| Paxillin Signaling                                                   | 1.02  | 0.0408 | MAPK14,SOS2,ITGA4,ITGAX               |
| Eicosanoid Signaling                                                 | 1.01  | 0.0484 | FPR2,ALOX5AP,ALOX5                    |
| D-myo-inositol-5-phosphate Metabolism                                | 1.01  | 0.0362 | PIP4P2,PLCG2,PPP4R1,ALPL,PTEN         |
| Hypoxia Signaling in the Cardiovascular System                       | 0.997 | 0.0476 | CREB5,UBE2D1,PTEN                     |
| Proline Biosynthesis II (from Arginine)                              | 0.993 | 0.167  | PADI4                                 |
| Urea Cycle                                                           | 0.993 | 0.167  | ARG1                                  |

|                                                                  |       |                                                    |
|------------------------------------------------------------------|-------|----------------------------------------------------|
| Arginine Degradation VI (Arginase 2 Pathway)                     | 0.993 | 0.167 ARG1                                         |
| Cytotoxic T Lymphocyte-mediated Apoptosis of Target Cells        | 0.984 | 0.0645 CD3G,BCL2                                   |
| 4-1BB Signaling in T Lymphocytes                                 | 0.984 | 0.0645 TNFRSF9,MAPK14                              |
| Inhibition of Angiogenesis by TSP1                               | 0.961 | 0.0625 MAPK14,MMP9                                 |
| Glucocorticoid Receptor Signaling                                | 0.955 | 0.0294 IL1R2,CD3G,ICAM1,MAPK14,SOS2,SLPI,IL1B,BCL2 |
| Superpathway of Inositol Phosphate Compounds                     | 0.946 | 0.0323 IPMK,PIP4P2,PLCG2,PPP4R1,ALPL,PTEN          |
| MIF-mediated Glucocorticoid Regulation                           | 0.938 | 0.0606 TLR4,LY96                                   |
| CCR5 Signaling in Macrophages                                    | 0.938 | 0.0448 CD3G,MAPK14,PLCG2                           |
| Inositol Pyrophosphates Biosynthesis                             | 0.93  | 0.143 IPMK                                         |
| Tryptophan Degradation to 2-amino-3-carboxymuconate Semialdehyde | 0.93  | 0.143 KMO                                          |
| NGF Signaling                                                    | 0.925 | 0.0377 PLCG2,SOS2,CREB5,MAP3K2                     |
| GDNF Family Ligand-Receptor Interactions                         | 0.923 | 0.0441 PLCG2,SOS2,IRS2                             |
| Chemokine Signaling                                              | 0.923 | 0.0441 MAPK14,PLCG2,LIMK2                          |
| Natural Killer Cell Signaling                                    | 0.904 | 0.037 KLRK4-KLRK1/KLRK1,PLCG2,KLRB1,SOS2           |
| Coagulation System                                               | 0.896 | 0.0571 F5,PLAUR                                    |
| Small Cell Lung Cancer Signaling                                 | 0.883 | 0.0423 TRAF5,BCL2,PTEN                             |
| PEDF Signaling                                                   | 0.883 | 0.0423 MAPK14,TCF7,BCL2                            |
| autophagy                                                        | 0.876 | 0.0556 W DFY3,BCL2                                 |
| Histidine Degradation III                                        | 0.876 | 0.125 HAL                                          |
| Citrulline Biosynthesis                                          | 0.876 | 0.125 ARG1                                         |
| Prolactin Signaling                                              | 0.857 | 0.0411 PLCG2,SOS2,TCF7                             |
| Integrin Signaling                                               | 0.84  | 0.03 PLCG2,SOS2,TTN,ITGA4,ITGAX,PTEN               |
| April Mediated Signaling                                         | 0.838 | 0.0526 MAPK14,TRAF5                                |
| Role of PKR in Interferon Induction and Antiviral Response       | 0.803 | 0.05 MAPK14,TRAF5                                  |
| B Cell Activating Factor Signaling                               | 0.803 | 0.05 MAPK14,TRAF5                                  |
| Pentose Phosphate Pathway                                        | 0.786 | 0.1 PGD                                            |
| Glycogen Degradation II                                          | 0.786 | 0.1 PYGL                                           |

|                                                         |       |                                       |
|---------------------------------------------------------|-------|---------------------------------------|
| Histidine Degradation VI                                | 0.786 | 0.1 HAL                               |
| G_i Signaling                                           | 0.786 | 0.0333 SOS2,FPR2,HCAR2,FPR1           |
| MIF Regulation of Innate Immunity                       | 0.786 | 0.0488 TLR4,LY96                      |
| Role of IL-17F in Allergic Inflammatory Airway Diseases | 0.786 | 0.0488 IL1B,CREB5                     |
| Dermatan Sulfate Biosynthesis (Late Stages)             | 0.77  | 0.0476 CHST15,SULT1B1                 |
| D-myo-inositol (1,4,5,6)-Tetrakisphosphate Biosynthesis | 0.768 | 0.0328 IPMK,PPP4R1,ALPL,PTEN          |
| D-myo-inositol (3,4,5,6)-tetrakisphosphate Biosynthesis | 0.768 | 0.0328 IPMK,PPP4R1,ALPL,PTEN          |
| Chondroitin Sulfate Biosynthesis (Late Stages)          | 0.738 | 0.0455 CHST15,SULT1B1                 |
| GNRH Signaling                                          | 0.726 | 0.0315 MAPK14,SOS2,CREB5,MAP3K2       |
| _Adrenergic Signaling                                   | 0.72  | 0.0353 PLCG2,PYGL,SLC8A1              |
| ErbB Signaling                                          | 0.72  | 0.0353 MAPK14,PLCG2,SOS2              |
| FGF Signaling                                           | 0.72  | 0.0353 MAPK14,SOS2,CREB5              |
| Bladder Cancer Signaling                                | 0.71  | 0.0349 MMP8,MMP25,MMP9                |
| MSP-RON Signaling Pathway                               | 0.709 | 0.0435 TLR2,TLR4                      |
| CTLA4 Signaling in Cytotoxic T Lymphocytes              | 0.7   | 0.0345 CD3G,CD28,TRAT1                |
| UVA-Induced MAPK Signaling                              | 0.7   | 0.0345 MAPK14,PARP15,PLCG2            |
| TGF-_ Signaling                                         | 0.7   | 0.0345 MAPK14,SOS2,BCL2               |
| Role of NFAT in Cardiac Hypertrophy                     | 0.695 | 0.0284 MAPK14,PLCG2,SOS2,IGF1R,SLC8A1 |
| PAK Signaling                                           | 0.69  | 0.0341 SOS2,LIMK2,ITGA4               |
| Fatty Acid Activation                                   | 0.684 | 0.0769 ACSL1                          |
| NAD biosynthesis II (from tryptophan)                   | 0.684 | 0.0769 KMO                            |
| Heparan Sulfate Biosynthesis (Late Stages)              | 0.681 | 0.0417 CHST15,SULT1B1                 |
| VEGF Signaling                                          | 0.68  | 0.0337 PLCG2,SOS2,BCL2                |
| IL-1 Signaling                                          | 0.662 | 0.033 MAPK14,IRAK3,IL1R1              |
| Death Receptor Signaling                                | 0.662 | 0.033 PARP15,BIRC3,BCL2               |
| Superpathway of Citrulline Metabolism                   | 0.655 | 0.0714 ARG1                           |
| Leukotriene Biosynthesis                                | 0.655 | 0.0714 ALOX5                          |

|                                            |       |        |                             |
|--------------------------------------------|-------|--------|-----------------------------|
| _glutamyl Cycle                            | 0.655 | 0.0714 | ANPEP                       |
| Vitamin-C Transport                        | 0.655 | 0.0714 | SLC2A3                      |
| CD27 Signaling in Lymphocytes              | 0.642 | 0.0392 | TRAF5,MAP3K2                |
| 3-phosphoinositide Degradation             | 0.634 | 0.0288 | PIP4P2,PPP4R1,ALPL,PTEN     |
| ERK/MAPK Signaling                         | 0.631 | 0.0269 | ETS1,PLCG2,SOS2,CREB5,ITGA4 |
| Endometrial Cancer Signaling               | 0.63  | 0.0385 | SOS2,PTEN                   |
| Chondroitin Sulfate Biosynthesis           | 0.63  | 0.0385 | CHST15,SULT1B1              |
| Oxidative Ethanol Degradation III          | 0.629 | 0.0667 | ACSL1                       |
| Unfolded protein response                  | 0.618 | 0.0377 | DNAJC3,BCL2                 |
| Regulation of eIF4 and p70S6K Signaling    | 0.613 | 0.0282 | MAPK14,SOS2,AGO4,ITGA4      |
| IGF-1 Signaling                            | 0.609 | 0.0309 | SOS2,IGF1R,IRS2             |
| Lymphotoxin _ Receptor Signaling           | 0.606 | 0.037  | TRAF5,TNFSF14               |
| Granzyme B Signaling                       | 0.605 | 0.0625 | LMNB1                       |
| Extrinsic Prothrombin Activation Pathway   | 0.605 | 0.0625 | F5                          |
| Parkinson's Signaling                      | 0.605 | 0.0625 | MAPK14                      |
| p53 Signaling                              | 0.601 | 0.0306 | MAPK14,BCL2,PTEN            |
| Heparan Sulfate Biosynthesis               | 0.595 | 0.0364 | CHST15,SULT1B1              |
| Dermatan Sulfate Biosynthesis              | 0.595 | 0.0364 | CHST15,SULT1B1              |
| Wnt/Ca+ pathway                            | 0.595 | 0.0364 | PLCG2,CREB5                 |
| Glioblastoma Multiforme Signaling          | 0.593 | 0.0276 | PLCG2,SOS2,IGF1R,PTEN       |
| Actin Nucleation by ARP-WASP Complex       | 0.584 | 0.0357 | SOS2,ITGA4                  |
| ErbB2-ErbB3 Signaling                      | 0.584 | 0.0357 | SOS2,PTEN                   |
| EGF Signaling                              | 0.584 | 0.0357 | MAPK14,SOS2                 |
| _linolenate Biosynthesis II (Animals)      | 0.582 | 0.0588 | ACSL1                       |
| Mitochondrial L-carnitine Shuttle Pathway  | 0.582 | 0.0588 | ACSL1                       |
| Cholecystokinin/Gastrin-mediated Signaling | 0.577 | 0.0297 | MAPK14,SOS2,IL1B            |
| Glioma Invasiveness Signaling              | 0.573 | 0.0351 | PLAUR,MMP9                  |

|                                                                                                       |       |        |                                        |
|-------------------------------------------------------------------------------------------------------|-------|--------|----------------------------------------|
| ErbB4 Signaling                                                                                       | 0.562 | 0.0345 | PLCG2,SOS2                             |
| Differential Regulation of Cytokine Production in Macrophages and T Helper Cells by IL-17A and IL-17F | 0.561 | 0.0556 | IL1B                                   |
| Induction of Apoptosis by HIV1                                                                        | 0.552 | 0.0339 | BIRC3,BCL2                             |
| ATM Signaling                                                                                         | 0.552 | 0.0339 | MAPK14,CREB5                           |
| Role of JAK1 and JAK3 in _c Cytokine Signaling                                                        | 0.542 | 0.0333 | BLNK,IRS2                              |
| 1D-myo-inositol Hexakisphosphate Biosynthesis II (Mammalian)                                          | 0.541 | 0.0526 | IPMK                                   |
| Ethanol Degradation IV                                                                                | 0.541 | 0.0526 | ACSL1                                  |
| Corticotropin Releasing Hormone Signaling                                                             | 0.532 | 0.028  | MAPK14,PLCG2,CREB5                     |
| Renin-Angiotensin Signaling                                                                           | 0.525 | 0.0278 | MAPK14,PLCG2,SOS2                      |
| Tryptophan Degradation III (Eukaryotic)                                                               | 0.522 | 0.05   | KMO                                    |
| Xenobiotic Metabolism Signaling                                                                       | 0.522 | 0.0234 | MAPK14,NQO2,IL1B,CHST15,SULT1B1,MAP3K2 |
| Dopamine-DARPP32 Feedback in cAMP Signaling                                                           | 0.52  | 0.0255 | KCNJ2,PLCG2,KCNJ15,CREB5               |
| ERK5 Signaling                                                                                        | 0.513 | 0.0317 | CREB5,MAP3K2                           |
| Estrogen-Dependent Breast Cancer Signaling                                                            | 0.513 | 0.0317 | IGF1R,CREB5                            |
| Pyridoxal 5'-phosphate Salvage Pathway                                                                | 0.513 | 0.0317 | LIMK2,MAK                              |
| Endoplasmic Reticulum Stress Pathway                                                                  | 0.505 | 0.0476 | DNAJC3                                 |
| IL-17A Signaling in Airway Cells                                                                      | 0.504 | 0.0312 | MAPK14,PTEN                            |
| Actin Cytoskeleton Signaling                                                                          | 0.502 | 0.0238 | TIAM2,SOS2,LIMK2,TTN,ITGA4             |
| Polyamine Regulation in Colon Cancer                                                                  | 0.488 | 0.0455 | MXD1                                   |
| Dopamine Degradation                                                                                  | 0.488 | 0.0455 | SULT1B1                                |
| Erythropoietin Signaling                                                                              | 0.478 | 0.0299 | PLCG2,SOS2                             |
| Role of MAPK Signaling in the Pathogenesis of Influenza                                               | 0.478 | 0.0299 | MAPK14,BCL2                            |
| Neurotrophin/TRK Signaling                                                                            | 0.478 | 0.0299 | SOS2,CREB5                             |
| Differential Regulation of Cytokine Production in Intestinal Epithelial Cells by IL-17A and IL-17F    | 0.473 | 0.0435 | IL1B                                   |
| Melatonin Signaling                                                                                   | 0.47  | 0.0294 | RORA,PLCG2                             |
| Growth Hormone Signaling                                                                              | 0.461 | 0.029  | PLCG2,IGF1R                            |
| Renal Cell Carcinoma Signaling                                                                        | 0.461 | 0.029  | ETS1,SOS2                              |



|                                                                    |       |        |                          |
|--------------------------------------------------------------------|-------|--------|--------------------------|
| p70S6K Signaling                                                   | 0.459 | 0.0254 | PLCG2,SOS2,CD79A         |
| IL-22 Signaling                                                    | 0.458 | 0.0417 | MAPK14                   |
| Lipid Antigen Presentation by CD1                                  | 0.458 | 0.0417 | CD1C                     |
| Tumoricidal Function of Hepatic Natural Killer Cells               | 0.458 | 0.0417 | ICAM1                    |
| Glutathione-mediated Detoxification                                | 0.458 | 0.0417 | ANPEP                    |
| RhoA Signaling                                                     | 0.447 | 0.025  | IGF1R,LIMK2,TTN          |
| IL-17A Signaling in Gastric Cells                                  | 0.444 | 0.04   | MAPK14                   |
| Role of JAK family kinases in IL-6-type Cytokine Signaling         | 0.444 | 0.04   | MAPK14                   |
| Ephrin Receptor Signaling                                          | 0.441 | 0.0233 | SOS2,LIMK2,CREB5,ITGA4   |
| Sertoli Cell-Sertoli Cell Junction Signaling                       | 0.436 | 0.0231 | MAPK14,ITGA4,MAP3K2,PTEN |
| LPS-stimulated MAPK Signaling                                      | 0.43  | 0.0274 | TLR4,MAPK14              |
| D-myo-inositol (1,4,5)-Trisphosphate Biosynthesis                  | 0.43  | 0.0385 | PLCG2                    |
| Pyrimidine Ribonucleotides Interconversion                         | 0.43  | 0.0385 | ENTPD1                   |
| FXR/RXR Activation                                                 | 0.419 | 0.024  | ORM1,ORM2,IL1B           |
| NRF2-mediated Oxidative Stress Response                            | 0.417 | 0.0226 | MAPK14,NQO2,DNAJC3,JUNB  |
| AMPK Signaling                                                     | 0.417 | 0.0226 | PFKFB3,MAPK14,IRS2,CREB5 |
| VEGF Family Ligand-Receptor Interactions                           | 0.409 | 0.0263 | PLCG2,SOS2               |
| TNFR2 Signaling                                                    | 0.405 | 0.0357 | BIRC3                    |
| Intrinsic Prothrombin Activation Pathway                           | 0.405 | 0.0357 | F5                       |
| Pyrimidine Ribonucleotides De Novo Biosynthesis                    | 0.405 | 0.0357 | ENTPD1                   |
| Insulin Receptor Signaling                                         | 0.403 | 0.0234 | SOS2,IRS2,PTEN           |
| PDGF Signaling                                                     | 0.402 | 0.026  | PLCG2,SOS2               |
| ILK Signaling                                                      | 0.4   | 0.0221 | IRS2,CREB5,MMP9,PTEN     |
| Acute Myeloid Leukemia Signaling                                   | 0.395 | 0.0256 | CSF2RA,SOS2              |
| Thyroid Hormone Metabolism II (via Conjugation and/or Degradation) | 0.393 | 0.0345 | SULT1B1                  |
| Ovarian Cancer Signaling                                           | 0.393 | 0.0231 | MMP9,BCL2,PTEN           |
| Clathrin-mediated Endocytosis Signaling                            | 0.387 | 0.0217 | ORM1,NUMB,ORM2,HIP1      |

|                                                                              |       |                                                  |
|------------------------------------------------------------------------------|-------|--------------------------------------------------|
| Ethanol Degradation II                                                       | 0.382 | 0.0333 ACSL1                                     |
| Fatty Acid _-oxidation I                                                     | 0.382 | 0.0333 ACSL1                                     |
| G Protein Signaling Mediated by Tubby                                        | 0.371 | 0.0323 PLCG2                                     |
| GPCR-Mediated Nutrient Sensing in Enteroendocrine Cells                      | 0.363 | 0.0241 PLCG2,FFAR2                               |
| Role of JAK2 in Hormone-like Cytokine Signaling                              | 0.361 | 0.0312 IRS2                                      |
| Circadian Rhythm Signaling                                                   | 0.351 | 0.0303 CREB5                                     |
| TWEAK Signaling                                                              | 0.351 | 0.0303 BIRC3                                     |
| Molecular Mechanisms of Cancer                                               | 0.346 | 0.0195 GAB2,MAPK14,RASGRP1,SOS2,BIRC3,ITGA4,BCL2 |
| IL-9 Signaling                                                               | 0.342 | 0.0294 IRS2                                      |
| G Beta Gamma Signaling                                                       | 0.334 | 0.0227 PLCG2,SOS2                                |
| IL-17A Signaling in Fibroblasts                                              | 0.333 | 0.0286 MAPK14                                    |
| Stearate Biosynthesis I (Animals)                                            | 0.333 | 0.0286 ACSL1                                     |
| Virus Entry via Endocytic Pathways                                           | 0.329 | 0.0225 PLCG2,ITGA4                               |
| Interferon Signaling                                                         | 0.324 | 0.0278 BCL2                                      |
| Notch Signaling                                                              | 0.315 | 0.027 NUMB                                       |
| Chronic Myeloid Leukemia Signaling                                           | 0.313 | 0.0217 GAB2,SOS2                                 |
| Fc_ Receptor-mediated Phagocytosis in Macrophages and Monocytes              | 0.308 | 0.0215 GAB2,PTEN                                 |
| SAPK/JNK Signaling                                                           | 0.308 | 0.0215 SOS2,MAP3K2                               |
| 3-phosphoinositide Biosynthesis                                              | 0.308 | 0.0201 PPP4R1,ALPL,PTEN                          |
| Mouse Embryonic Stem Cell Pluripotency                                       | 0.303 | 0.0213 MAPK14,SOS2                               |
| Aldosterone Signaling in Epithelial Cells                                    | 0.3   | 0.0199 PLCG2,SOS2,DNAJC3                         |
| Gap Junction Signaling                                                       | 0.3   | 0.0199 PLCG2,SOS2,MAP3K2                         |
| Telomerase Signaling                                                         | 0.294 | 0.0208 ETS1,SOS2                                 |
| Amyotrophic Lateral Sclerosis Signaling                                      | 0.289 | 0.0206 BIRC3,BCL2                                |
| Mechanisms of Viral Exit from Host Cells                                     | 0.285 | 0.0244 LMNB1                                     |
| Role of Hypercytokinemia/hyperchemokineemia in the Pathogenesis of Influenza | 0.285 | 0.0244 IL1B                                      |
| Germ Cell-Sertoli Cell Junction Signaling                                    | 0.281 | 0.0192 MAPK14,LIMK2,MAP3K2                       |

|                                                                   |       |        |                                         |
|-------------------------------------------------------------------|-------|--------|-----------------------------------------|
| Melanoma Signaling                                                | 0.277 | 0.0238 | PTEN                                    |
| UVC-Induced MAPK Signaling                                        | 0.277 | 0.0238 | MAPK14                                  |
| Rac Signaling                                                     | 0.262 | 0.0194 | LIMK2,ITGA4                             |
| Cardiac Hypertrophy Signaling                                     | 0.261 | 0.0182 | MAPK14,PLCG2,IGF1R,MAP3K2               |
| Pancreatic Adenocarcinoma Signaling                               | 0.25  | 0.0189 | MMP9,BCL2                               |
| fMLP Signaling in Neutrophils                                     | 0.246 | 0.0187 | FPR2,FPR1                               |
| TNFR1 Signaling                                                   | 0.245 | 0.0213 | BIRC3                                   |
| Huntington's Disease Signaling                                    | 0.245 | 0.0177 | SOS2,IGF1R,HIP1,CREB5                   |
| Endothelin-1 Signaling                                            | 0.242 | 0.0179 | MAPK14,PLCG2,ECE1                       |
| Role of NANOG in Mammalian Embryonic Stem Cell Pluripotency       | 0.239 | 0.0183 | SOS2,TCL1A                              |
| CREB Signaling in Neurons                                         | 0.238 | 0.0178 | PLCG2,SOS2,CREB5                        |
| Melatonin Degradation I                                           | 0.229 | 0.02   | SULT1B1                                 |
| Amyloid Processing                                                | 0.229 | 0.02   | MAPK14                                  |
| CCR3 Signaling in Eosinophils                                     | 0.224 | 0.0177 | MAPK14,LIMK2                            |
| Role of Cytokines in Mediating Communication between Immune Cells | 0.218 | 0.0192 | IL1B                                    |
| Semaphorin Signaling in Neurons                                   | 0.218 | 0.0192 | LIMK2                                   |
| UVB-Induced MAPK Signaling                                        | 0.213 | 0.0189 | MAPK14                                  |
| IL-2 Signaling                                                    | 0.213 | 0.0189 | SOS2                                    |
| Role of IL-17A in Arthritis                                       | 0.208 | 0.0185 | MAPK14                                  |
| Phospholipases                                                    | 0.204 | 0.0182 | PLCG2                                   |
| Superpathway of Melatonin Degradation                             | 0.204 | 0.0182 | SULT1B1                                 |
| Regulation of Cellular Mechanics by Calpain Protease              | 0.204 | 0.0182 | ITGA4                                   |
| Serotonin Degradation                                             | 0.199 | 0.0179 | SULT1B1                                 |
| Glutamate Receptor Signaling                                      | 0.199 | 0.0179 | SLC38A1                                 |
| Synaptic Long Term Potentiation                                   | 0     | 0.0172 | PLCG2,CREB5                             |
| Axonal Guidance Signaling                                         | 0     | 0.0164 | PLXNC1,PLCG2,MMP8,SOS2,LIMK2,MMP9,ITGA4 |
| Synaptic Long Term Depression                                     | 0     | 0.0147 | PLCG2,IGF1R                             |

|                                                   |   |         |              |
|---------------------------------------------------|---|---------|--------------|
| Aryl Hydrocarbon Receptor Signaling               | 0 | 0.0148  | NQO2,IL1B    |
| Mitochondrial Dysfunction                         | 0 | 0.00606 | BCL2         |
| VDR/RXR Activation                                | 0 | 0.013   | MXD1         |
| Ceramide Signaling                                | 0 | 0.0125  | BCL2         |
| Tight Junction Signaling                          | 0 | 0.00602 | PTEN         |
| TR/RXR Activation                                 | 0 | 0.0118  | HP           |
| Regulation of Actin-based Motility by Rho         | 0 | 0.0115  | ITGA4        |
| RAR Activation                                    | 0 | 0.0107  | MAPK14,PTEN  |
| 14-3-3-mediated Signaling                         | 0 | 0.00862 | PLCG2        |
| NF- $\kappa$ B Activation by Viruses              | 0 | 0.0137  | ITGA4        |
| IL-3 Signaling                                    | 0 | 0.0141  | GAB2         |
| IL-17 Signaling                                   | 0 | 0.0139  | MAPK14       |
| IL-15 Signaling                                   | 0 | 0.0159  | MAPK14       |
| Reelin Signaling in Neurons                       | 0 | 0.0127  | ITGA4        |
| Cellular Effects of Sildenafil (Viagra)           | 0 | 0.00806 | PLCG2        |
| Neuropathic Pain Signaling In Dorsal Horn Neurons | 0 | 0.0101  | PLCG2        |
| Relaxin Signaling                                 | 0 | 0.00758 | MMP9         |
| Factors Promoting Cardiogenesis in Vertebrates    | 0 | 0.0112  | MAPK14       |
| Agrin Interactions at Neuromuscular Junction      | 0 | 0.0149  | ITGA4        |
| Thrombin Signaling                                | 0 | 0.0107  | MAPK14,PLCG2 |
| CDK5 Signaling                                    | 0 | 0.0102  | MAPK14       |
| Type II Diabetes Mellitus Signaling               | 0 | 0.0175  | IRS2,ACSL1   |
| Non-Small Cell Lung Cancer Signaling              | 0 | 0.0154  | SOS2         |
| Sphingosine-1-phosphate Signaling                 | 0 | 0.00926 | PLCG2        |
| EIF2 Signaling                                    | 0 | 0.0116  | SOS2,AGO4    |
| Retinoic acid Mediated Apoptosis Signaling        | 0 | 0.0172  | PARP15       |
| Hereditary Breast Cancer Signaling                | 0 | 0.00794 | PTEN         |

|                                                                                 |   |         |                           |
|---------------------------------------------------------------------------------|---|---------|---------------------------|
| HER-2 Signaling in Breast Cancer                                                | 0 | 0.0132  | SOS2                      |
| Protein Kinase A Signaling                                                      | 0 | 0.0135  | PLCG2,PYGL,CREB5,TTN,PTEN |
| Leptin Signaling in Obesity                                                     | 0 | 0.0137  | PLCG2                     |
| Breast Cancer Regulation by Stathmin1                                           | 0 | 0.0105  | SOS2,LIMK2                |
| P2Y Purigenic Receptor Signaling Pathway                                        | 0 | 0.0169  | PLCG2,CREB5               |
| Signaling by Rho Family GTPases                                                 | 0 | 0.00858 | LIMK2,ITGA4               |
| RhoGDI Signaling                                                                | 0 | 0.0116  | LIMK2,ITGA4               |
| eNOS Signaling                                                                  | 0 | 0.0148  | AQP9,PLCG2                |
| Epithelial Adherens Junction Signaling                                          | 0 | 0.00699 | PTEN                      |
| G_q Signaling                                                                   | 0 | 0.0138  | RGS2,PLCG2                |
| Regulation of the Epithelial-Mesenchymal Transition Pathway                     | 0 | 0.0165  | ETS1,SOS2,MMP9            |
| Sperm Motility                                                                  | 0 | 0.00877 | PLCG2                     |
| Adipogenesis pathway                                                            | 0 | 0.00758 | TCF7                      |
| PCP pathway                                                                     | 0 | 0.0161  | JUNB                      |
| Estrogen Receptor Signaling                                                     | 0 | 0.00781 | SOS2                      |
| Cardiac _-adrenergic Signaling                                                  | 0 | 0.00758 | SLC8A1                    |
| Protein Ubiquitination Pathway                                                  | 0 | 0.0118  | DNAJC3,BIRC3,UBE2D1       |
| JAK/Stat Signaling                                                              | 0 | 0.0139  | SOS2                      |
| Wnt/_-catenin Signaling                                                         | 0 | 0.012   | FRAT1,KREMEN1             |
| BMP signaling pathway                                                           | 0 | 0.0135  | MAPK14                    |
| GPCR-Mediated Integration of Enteroendocrine Signaling Exemplified by an L Cell | 0 | 0.0143  | PLCG2                     |
| Gustation Pathway                                                               | 0 | 0.00847 | P2RY10                    |
| phagosome maturation                                                            | 0 | 0.00847 | HLA-DRB1                  |
| Macropinocytosis Signaling                                                      | 0 | 0.0147  | PLCG2                     |
| Calcium Signaling                                                               | 0 | 0.0176  | ASPH,SLC8A1,CREB5         |
